# Supplementary material for: Development of Inhibitors, Probes, and PROTAC Provides a Complete Toolbox to Study PARK7 in the Living Cell
Source: PubMed Central journal article supplement (PMC11129182; doi:10.1021/acs.jmedchem.3c02410), 2024-05-07

## SUPPORTING INFORMATION

### **Development of Inhibitors, Probes, and PROTAC Provides a Complete Toolbox to Study PARK7 in the Living Cell**

**Yuqing Jia,<sup>†,‡</sup> Merve Oyken,<sup>†</sup> Robbert Q. Kim,<sup>†</sup> Rayman T.N. Tjokrodirijo,<sup>§</sup> Arnoud H. de Ru,<sup>§</sup> Antonius P. A. Janssen,<sup>||</sup> Stephan M. Hacker,<sup>||</sup> Peter A. van Veelen,<sup>§</sup> Paul P. Geurink<sup>\*,†</sup> and Aysegul Sapmaz<sup>\*,†</sup>**

<sup>†</sup> Department of Cell and Chemical Biology, Division of Chemical Biology and Drug Discovery, Leiden University Medical Center, Leiden 2333 ZC, The Netherlands

<sup>‡</sup> Laboratory for Organic Chemistry, Department of Chemistry and Applied Biosciences, ETH Zürich, Zürich CH-8093, Switzerland

<sup>§</sup> Center for Proteomics and Metabolomics, Leiden University Medical Center, Leiden 2333 ZA, The Netherlands

<sup>||</sup> Department of Molecular Physiology, Leiden Institute of Chemistry, Leiden University, Leiden 2333 CC, The Netherlands.

\* Corresponding authors: A.S. (a.sapmaz@lumc.nl); P.P.G. (p.p.geurink@lumc.nl)

## Table of contents

|                                                                                                                             |     |
|-----------------------------------------------------------------------------------------------------------------------------|-----|
| Figure S1. Assessment of the cell permeability of <b>JYQ-88</b> .....                                                       | S3  |
| Figure S2. Inhibition of PARK7 by 3 inhibitors and amine precursor.....                                                     | S4  |
| Figure S3. Activity evaluation of inhibitors against DUBs in HEK293T cells.....                                             | S5  |
| Figure S4. Assessment of covalent bond formation of <b>JYQ-164, JYQ-173</b> .....                                           | S6  |
| Figure S5. IC <sub>50</sub> determination of <b>JYQ-164, JYQ-173</b> .....                                                  | S7  |
| Table S1. Inhibition values and selectivity ratios of <b>JYQ-88, JYQ-164, and JYQ-173</b><br>between PARK7 and UCHL1 .....  | S7  |
| Figure S6. Cytotoxicity assay for <b>JYQ-164</b> and <b>JYQ-173</b> in A549 cells .....                                     | S8  |
| Figure S7. PARK7 labeling in HEK293T and A549 cells with probes.....                                                        | S9  |
| Figure S8. Cell permeability and cellular PARK7 labeling efficiency of <b>JYQ-192,</b><br><b>JYQ-196, and JYQ-197</b> ..... | S10 |
| Figure S9. Off-target validation of <b>JYQ-196</b> in HEK293T and A549 cells.....                                           | S12 |
| Figure S10. Degradation evaluation of PROTACs <b>JYQ-187, JYQ-188</b> .....                                                 | S13 |
| Figure S11. Plate lay-out and LC-MS analysis of the compound library.....                                                   | S14 |
| NMR spectra .....                                                                                                           | S15 |
| LC-MS spectra .....                                                                                                         | S44 |

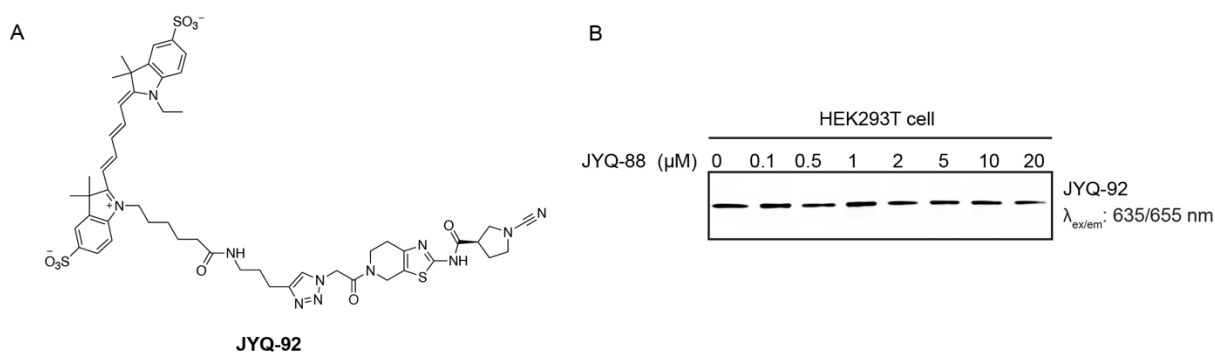

**Figure S1.** Assessment of the cell permeability of **JYQ-88**. (A) Structure of **JYQ-92**. (B) Target engagement of **JYQ-88** in HEK293T cells. HEK293T cells were incubated with a concentration series of **JYQ-88** for 24 h, followed by cell lysis and incubation with PARK7 probe **JYQ-92** for 1 h at 37 °C. The reactions were stopped by the addition of NuPAGE™ LDS sample buffer (4x). Samples were resolved by SDS-PAGE using a 12% Bis-Tris gel with MES SDS running buffer (Novex, NuPAGE) and visualized by fluorescence scanning on a Typhoon FLA 9500 (GE Healthcare Life Sciences) using a Cy5 channel ( $\lambda_{ex/em}$  635/655 nm). The disappearance of the **JYQ-92**-labeled band in the cell lysates as a result of HEK293T cells treatment with the indicated concentration of **JYQ-88** is used as a measurement of cellular PARK7 engagement with **JYQ-88**.

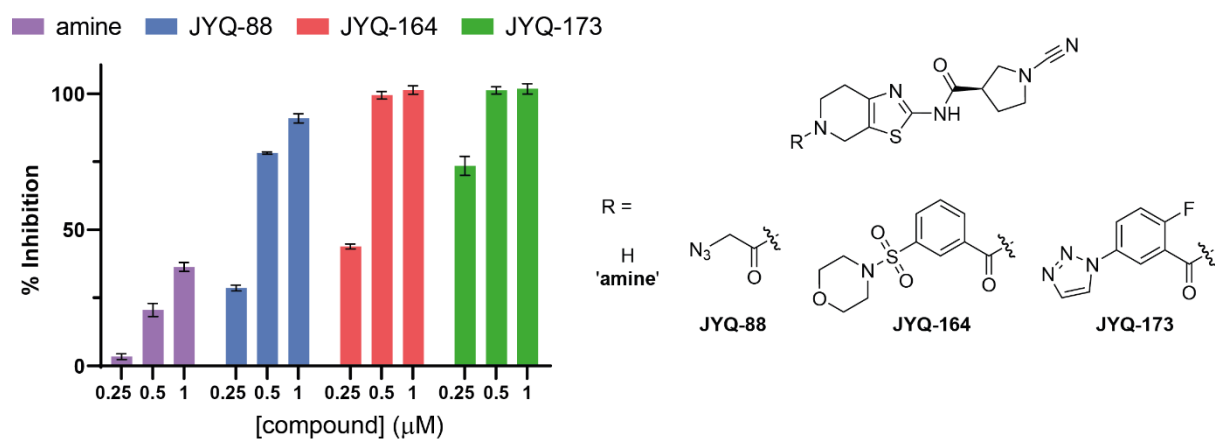

**Figure S2.** Inhibition of PARK7 at 0.25, 0.5 and 1  $\mu\text{M}$  final concentration of three PARK7 inhibitors and their amine precursor, determined using the PARK7 FP assay.

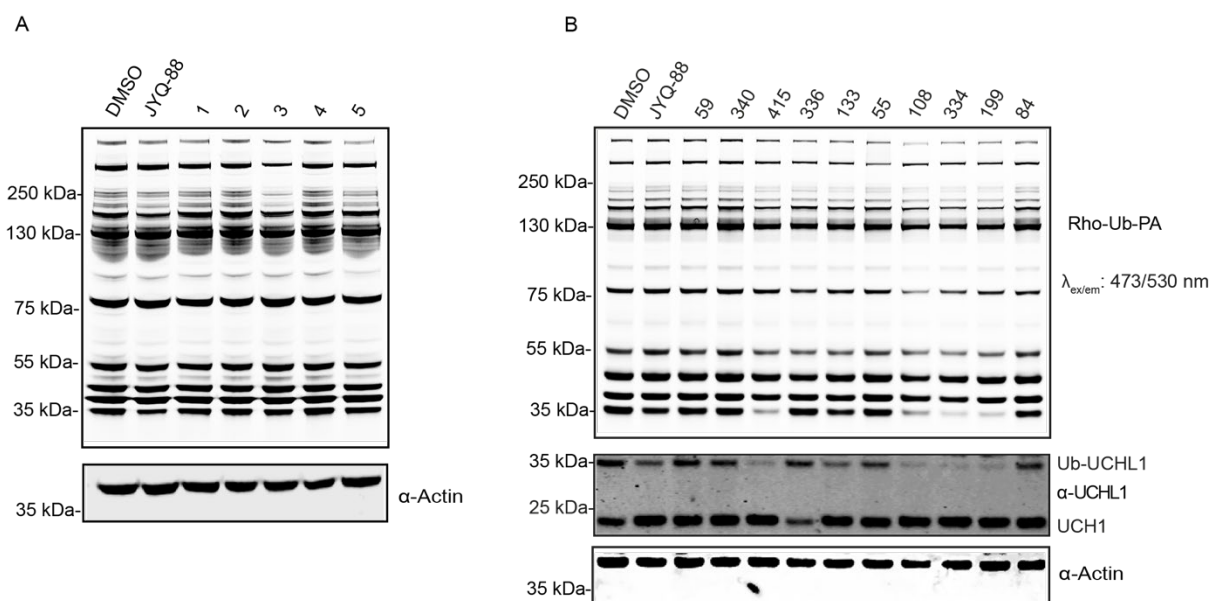

**Figure S3.** Activity evaluation of inhibitors against DUBs in HEK293T cells. (A) Inhibitors from structure modification. (B) Inhibitors from HTS. HEK293T cells were incubated with 5  $\mu$ M of the indicated compounds for 24 h, followed by cell lysis and incubation with Rho-Ub-PA probe for 30 min at 37  $^{\circ}$ C. Samples were resolved by SDS-PAGE using a 4-12% Bis-Tris gel with MOPS SDS running buffer (Novex, NuPAGE) and visualized by fluorescence scanning on a Typhoon FLA 9500 (GE Healthcare Life Sciences) using a Rhodamine channel ( $\lambda_{ex/em}$  473/530 nm), followed by transferring to Nitrocellulose membranes and Western blot analysis.

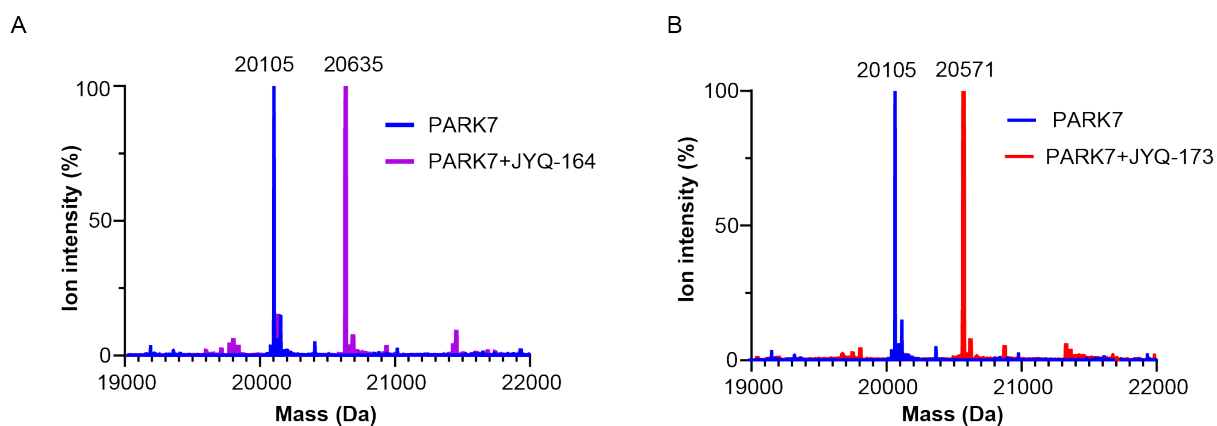

**Figure S4.** Assessment of covalent bond formation of **JYQ-164** and **JYQ-173** with PARK7. Purified recombinant PARK7 protein was analyzed by intact mass spectrometry following incubation with **JYQ-164** or **JYQ-173**. Both inhibitors formed a covalent complex with PARK7 as indicated by a molecular weight increase of 520 Da (panel A) and 466 Da (panel B).

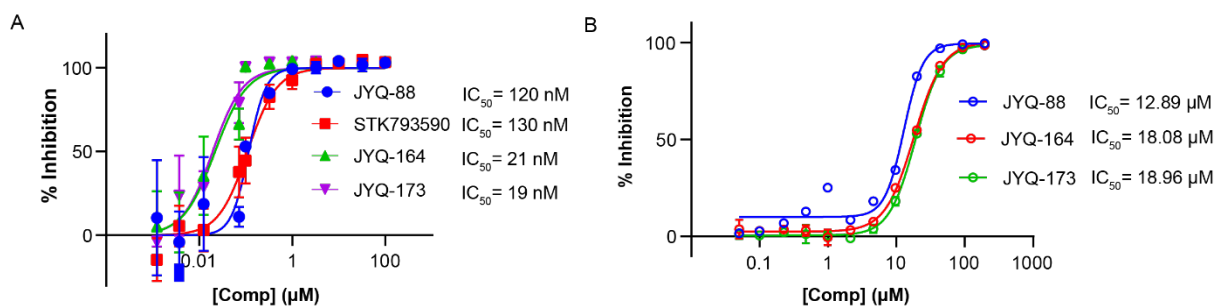

**Figure S5.** IC<sub>50</sub> determinations. (A) IC<sub>50</sub> determination of **JYQ-164**, **JYQ-173**, **JYQ-88**, and **STK793590** for PARK7 using the DiFUMAc assay. (B) IC<sub>50</sub> determination of **JYQ-88**, **JYQ-164**, and **JYQ-173** for UCHL1 using Ub-RhoMorpholine as substrate.

**Table S1.** Inhibition values and selectivity ratios of **JYQ-88**, **JYQ-164**, and **JYQ-173** between PARK7 and UCHL1. The inhibition value is given as IC<sub>50</sub> (μM).

| Compound | PARK7 | UCHL1 | Selectivity ratio |
|----------|-------|-------|-------------------|
| JYQ-88   | 0.120 | 12.89 | 100               |
| JYQ-164  | 0.021 | 18.08 | 861               |
| JYQ-173  | 0.019 | 18.96 | 998               |

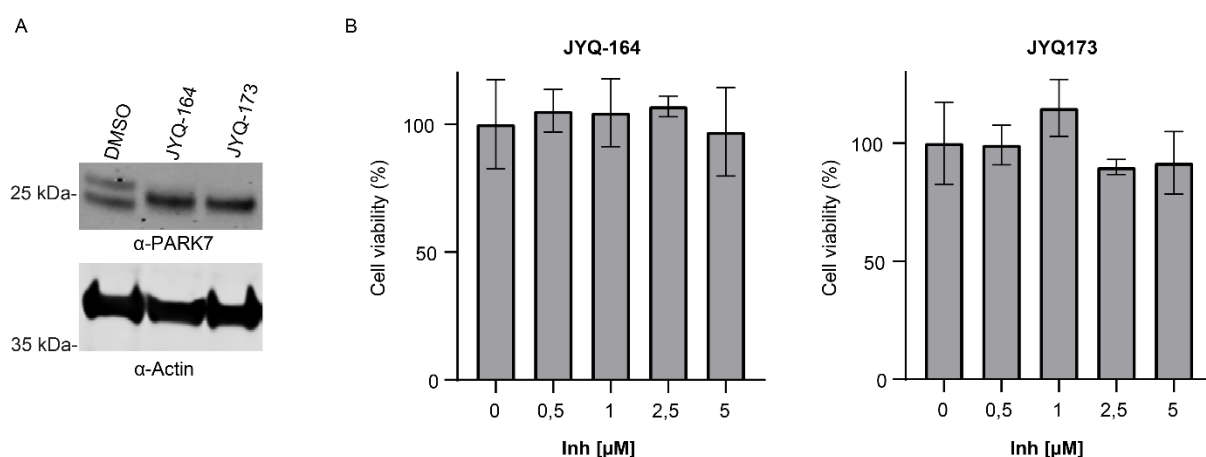

**Figure S6.** Cytotoxicity assay for **JYQ-164** and **JYQ-173** in A549 cells. (A) PARK7 engagement of **JYQ-164** and **JYQ-173** in A549 cells. A549 cells were incubated with 1 μM of the indicated compounds for 72 h, where the inhibitors were renewed after 36 h, followed by cell lysis and incubation with PARK7 probe **JYQ-92** for 1 h at 37 °C. The reactions were stopped by addition of NuPAGE™ LDS sample buffer (4x), followed by cell lysis, SDS-PAGE, fluorescence scanning, and immunoblotting against PARK7 and β-actin. β-actin was used as a loading control. (B) A549 cells were incubated with indicated concentration of **JYQ-164** (left panel) or **JYQ-173** (right panel) for 72 h where the inhibitors were renewed after 36 h. Cell viability was measured using the CellTiter-Blue assay. Relative viability was normalized to untreated control and corrected for background signal.



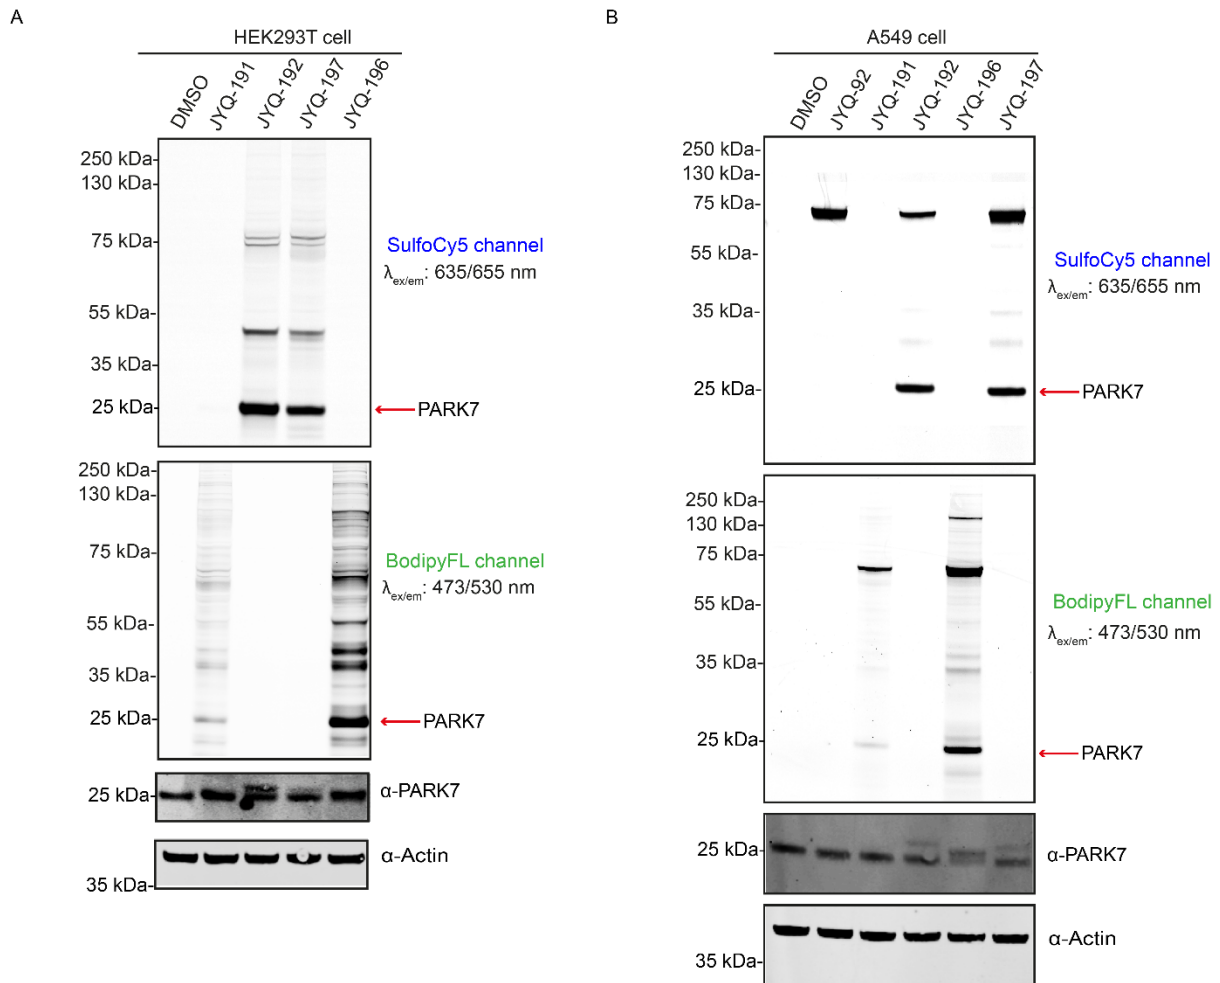

**Figure S7.** Assessment of PARK7 labeling in HEK293T and A549 cells with probes derived from PARK7 inhibitors **JYQ-164** and **JYQ-173**. HEK293T (A) and A549 (B) cells were incubated with 5  $\mu\text{M}$  final concentration of indicated probes or DMSO for 24 h, followed by cell lysis, SDS-PAGE, fluorescence scanning, and immunoblotting against PARK7 and  $\beta$ -actin.  $\beta$ -actin was used as a loading control.

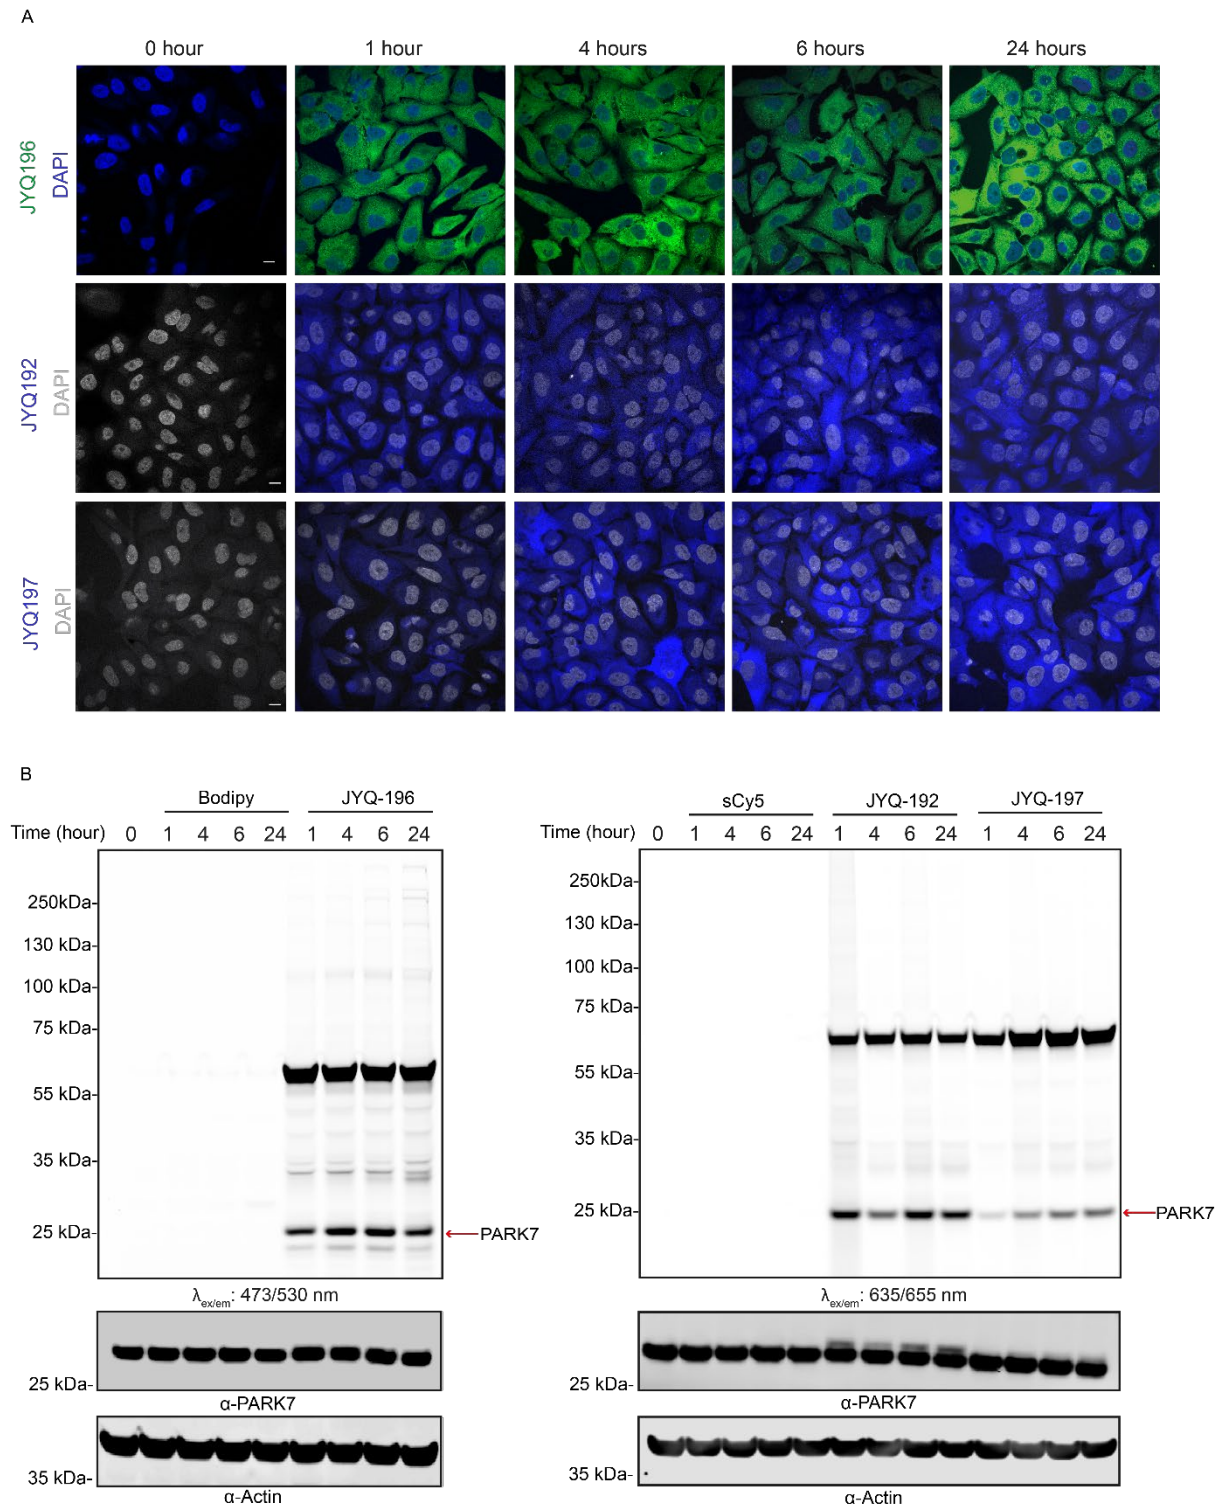

**Figure S8.** Assessment of cell permeability and cellular PARK7 labeling efficiency of **JYQ-192**, **JYQ-196**, and **JYQ-197**. (A) Representative confocal images of fixed A549 cells treated with 5  $\mu$ M final concentration of **JYQ-192**, **JYQ-196**, or **JYQ-197** at the indicated time points. **JYQ-196** (green) overlays with DAPI (blue) in the top panel, and **JYQ-192** and **JYQ-197** (blue) overlays with DAPI (gray) in the middle and bottom

panel, respectively. Scale bars = 10  $\mu\text{m}$ . (B) A549 cells treated with 5  $\mu\text{M}$  final concentration of **JYQ-192**, **JYQ-196**, **JYQ-197**, SulfoCy5 or BodipyFL at the indicated time points followed by cell lysis, SDS-PAGE, fluorescence scanning, and immunoblotting against PARK7 and  $\beta$ -actin.  $\beta$ -actin was used as a loading control.

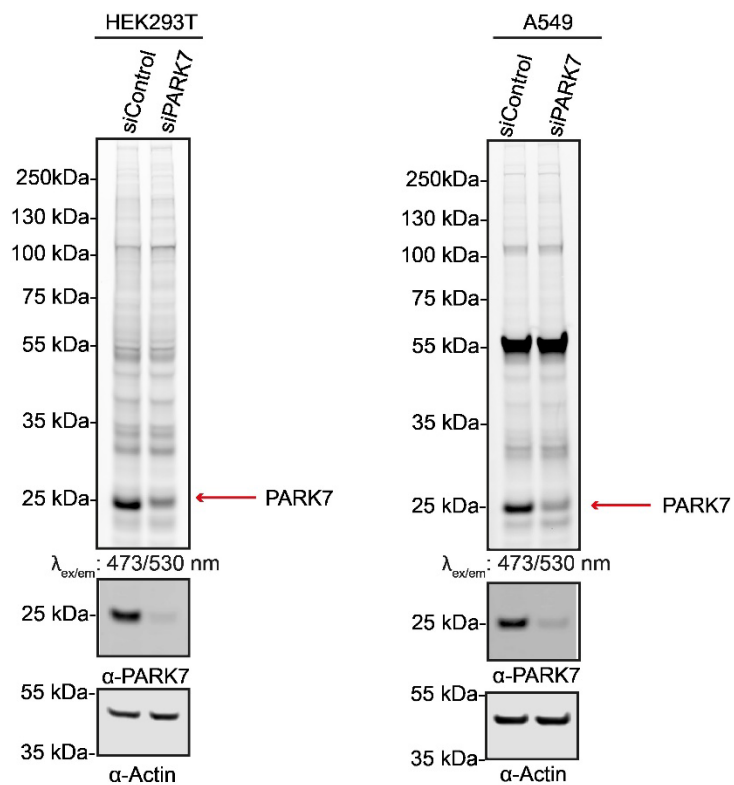

**Figure S9.** Off-target validation of **JYQ-196** in HEK293T and A549 cells. HEK293T cells and A549 cells were transfected with siControl or siPARK7 and incubated for 48 h. 5  $\mu$ M final concentration of **JYQ-196** was added to the samples and cells were incubated for 4 h, followed by cell lysis, SDS-PAGE, fluorescence scanning, and immunoblotting against PARK7 and  $\beta$ -actin.  $\beta$ -actin was used as a loading control.

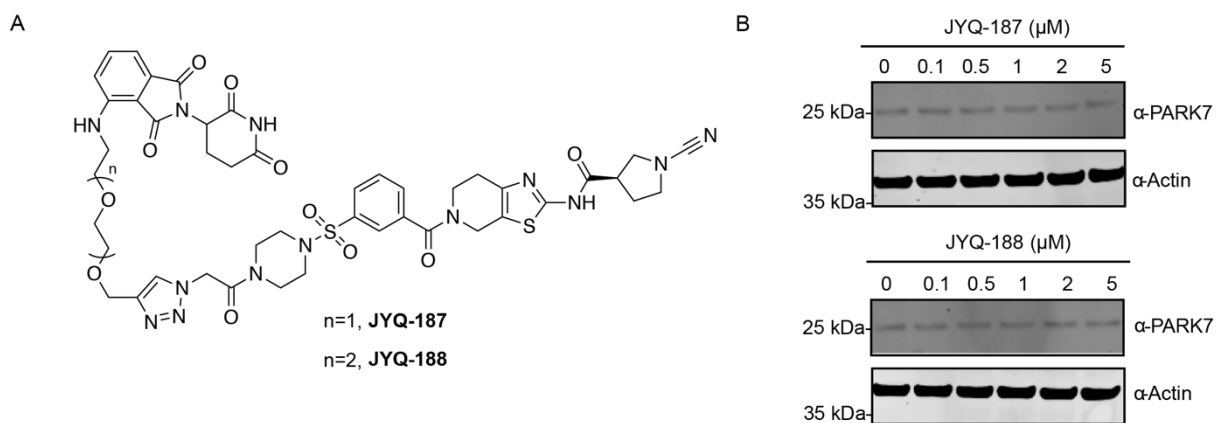

**Figure S10.** Degradation evaluation of PROTACs **JYQ-187** and **JYQ-188**. (A) Structures of PROTACs **JYQ-187** and **JYQ-188**. (B) PARK7 degradation efficacy with PROTACs **JYQ-187**, **JYQ-188**. A549 cells were incubated with indicated PROTACs for 8 h before cell lysis and western blot analysis.

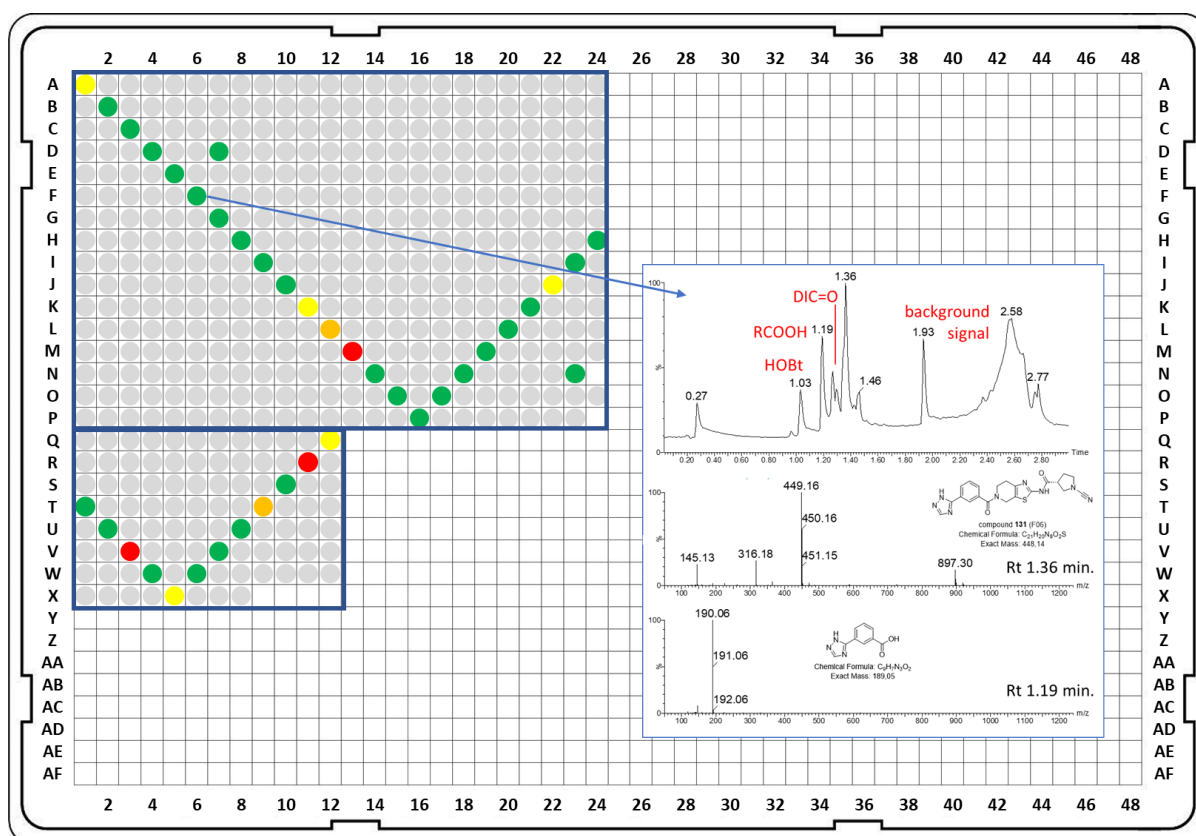

**Figure S11.** Plate lay-out showing the LC-MS analysis results of the compound library. A representative number of compounds (38 in total) covering all rows and columns in the plate were analyzed as indicated: 30 nL of the crude compound mixtures from the 10 mM synthesis plate was diluted in 30  $\mu$ L ACN/H<sub>2</sub>O 1:1 v/v and analyzed by LC-MS (1  $\mu$ L injection). Product formation was assessed qualitatively from the LC-MS spectra. Colors represent product quality. **Green:** main product peak; **yellow:** intermediate product peak; **orange:** minor product peak; **red:** no product observed; **grey:** not analyzed. Insert: example of a typical LC-MS trace (compound **131**; well F06).

# NMR Spectra

## <sup>1</sup>H-NMR and <sup>13</sup>C-NMR of compound 1 in DMSO.

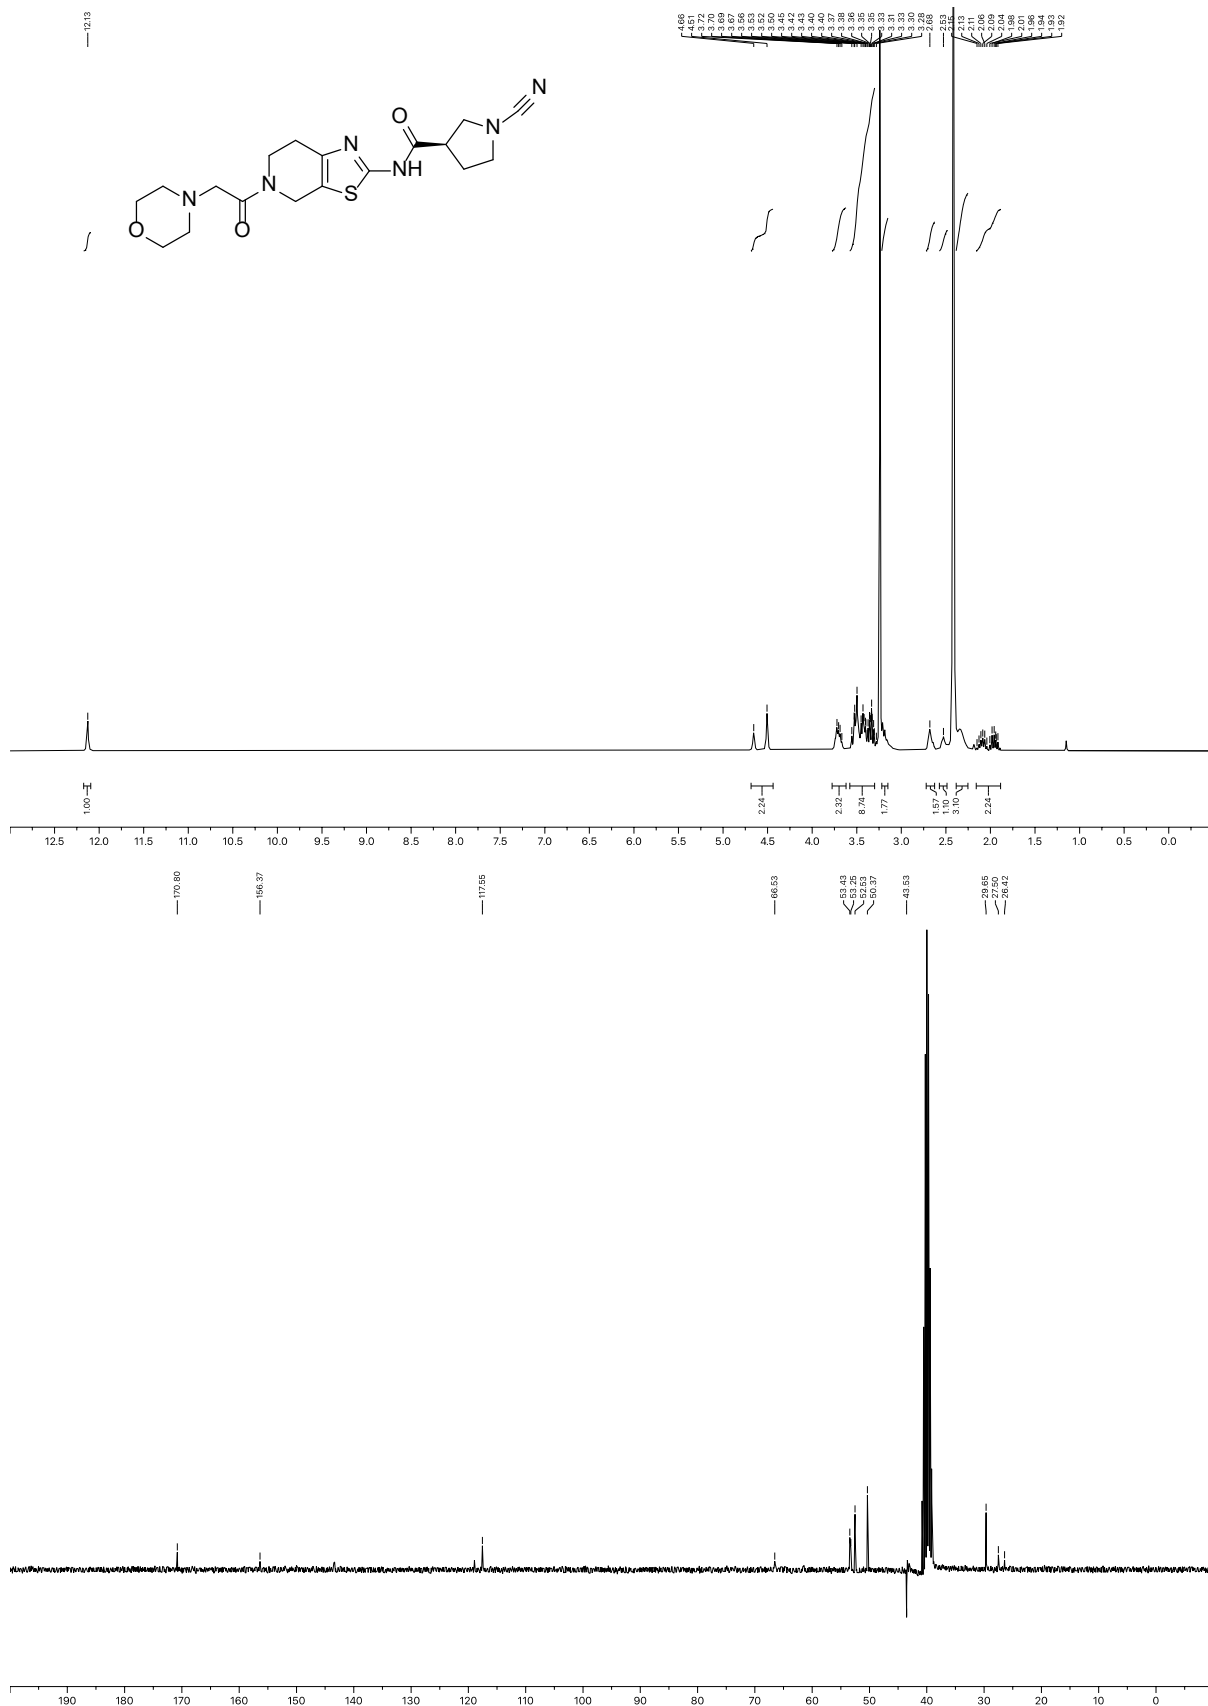

# <sup>1</sup>H-NMR and <sup>13</sup>C-NMR of compound 2 in DMSO.

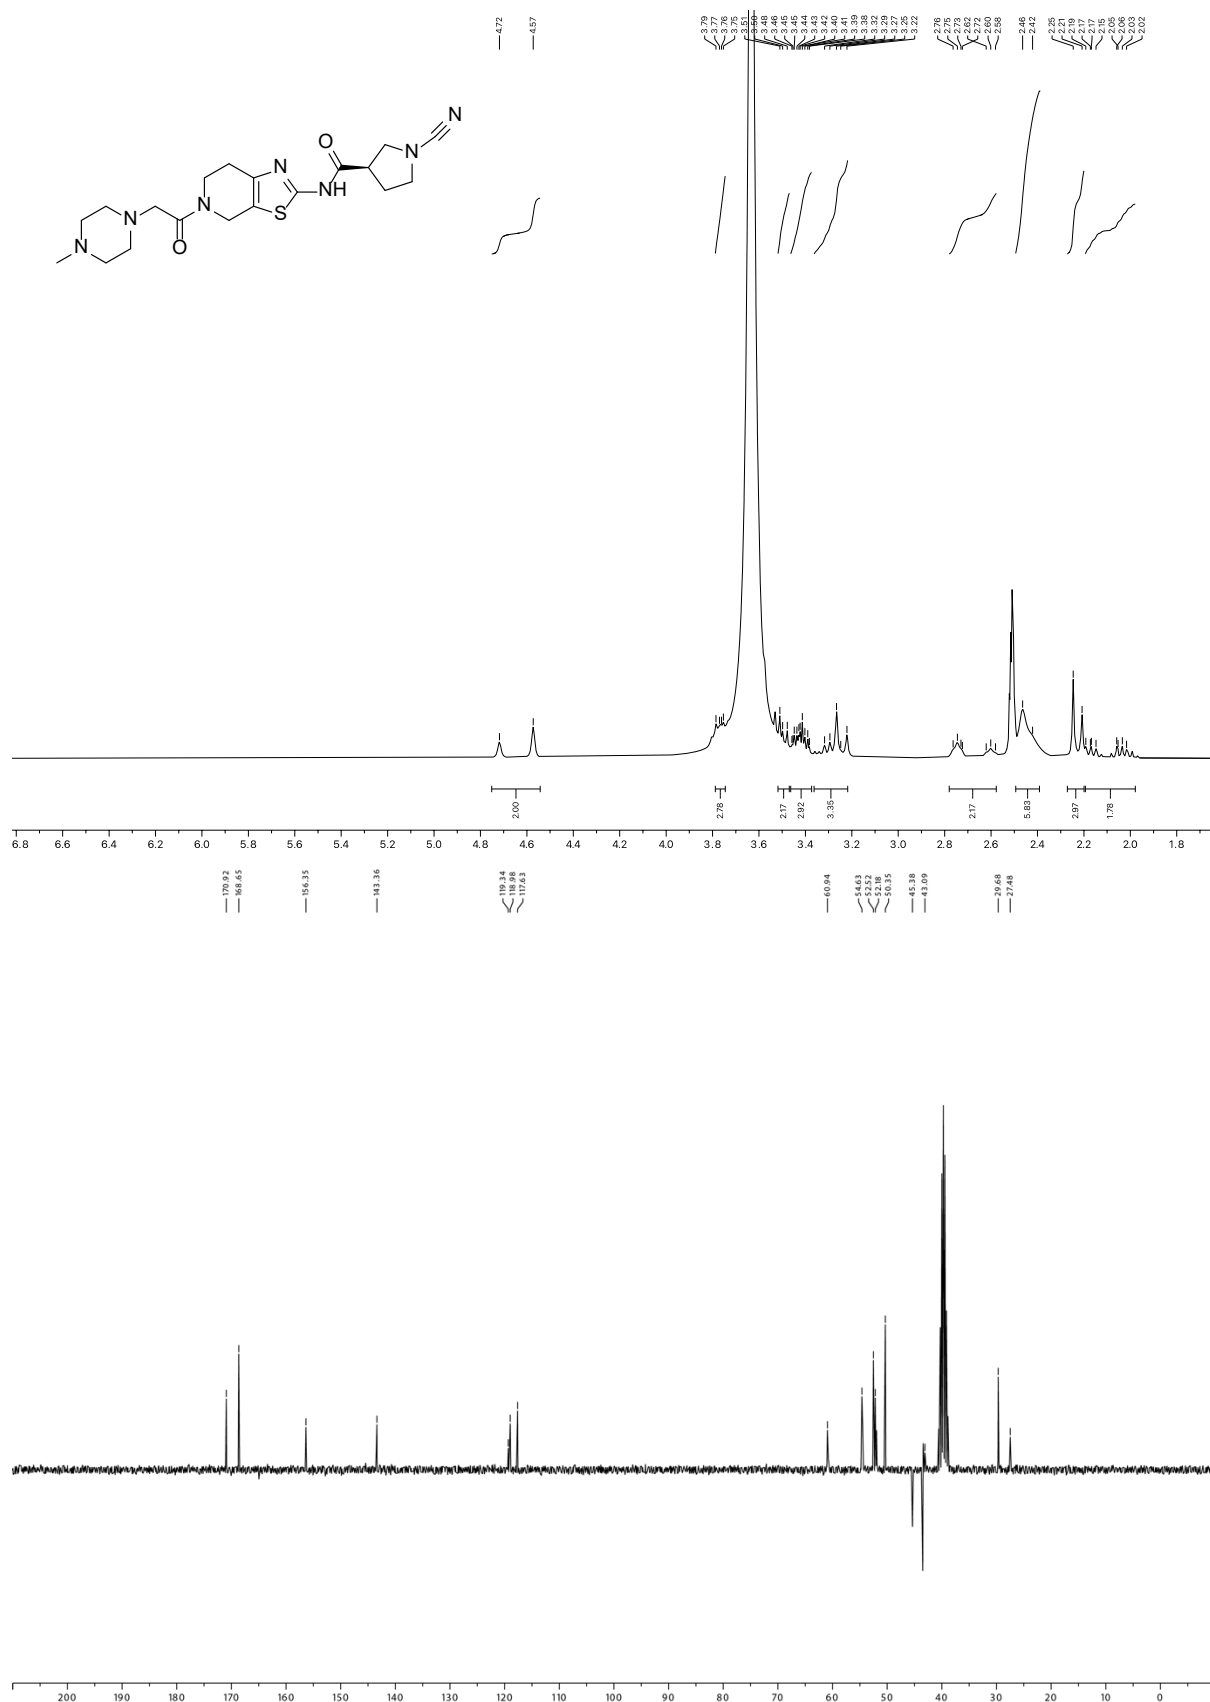



**<sup>1</sup>H-NMR and <sup>13</sup>C-NMR of compound 3 in DMSO.**

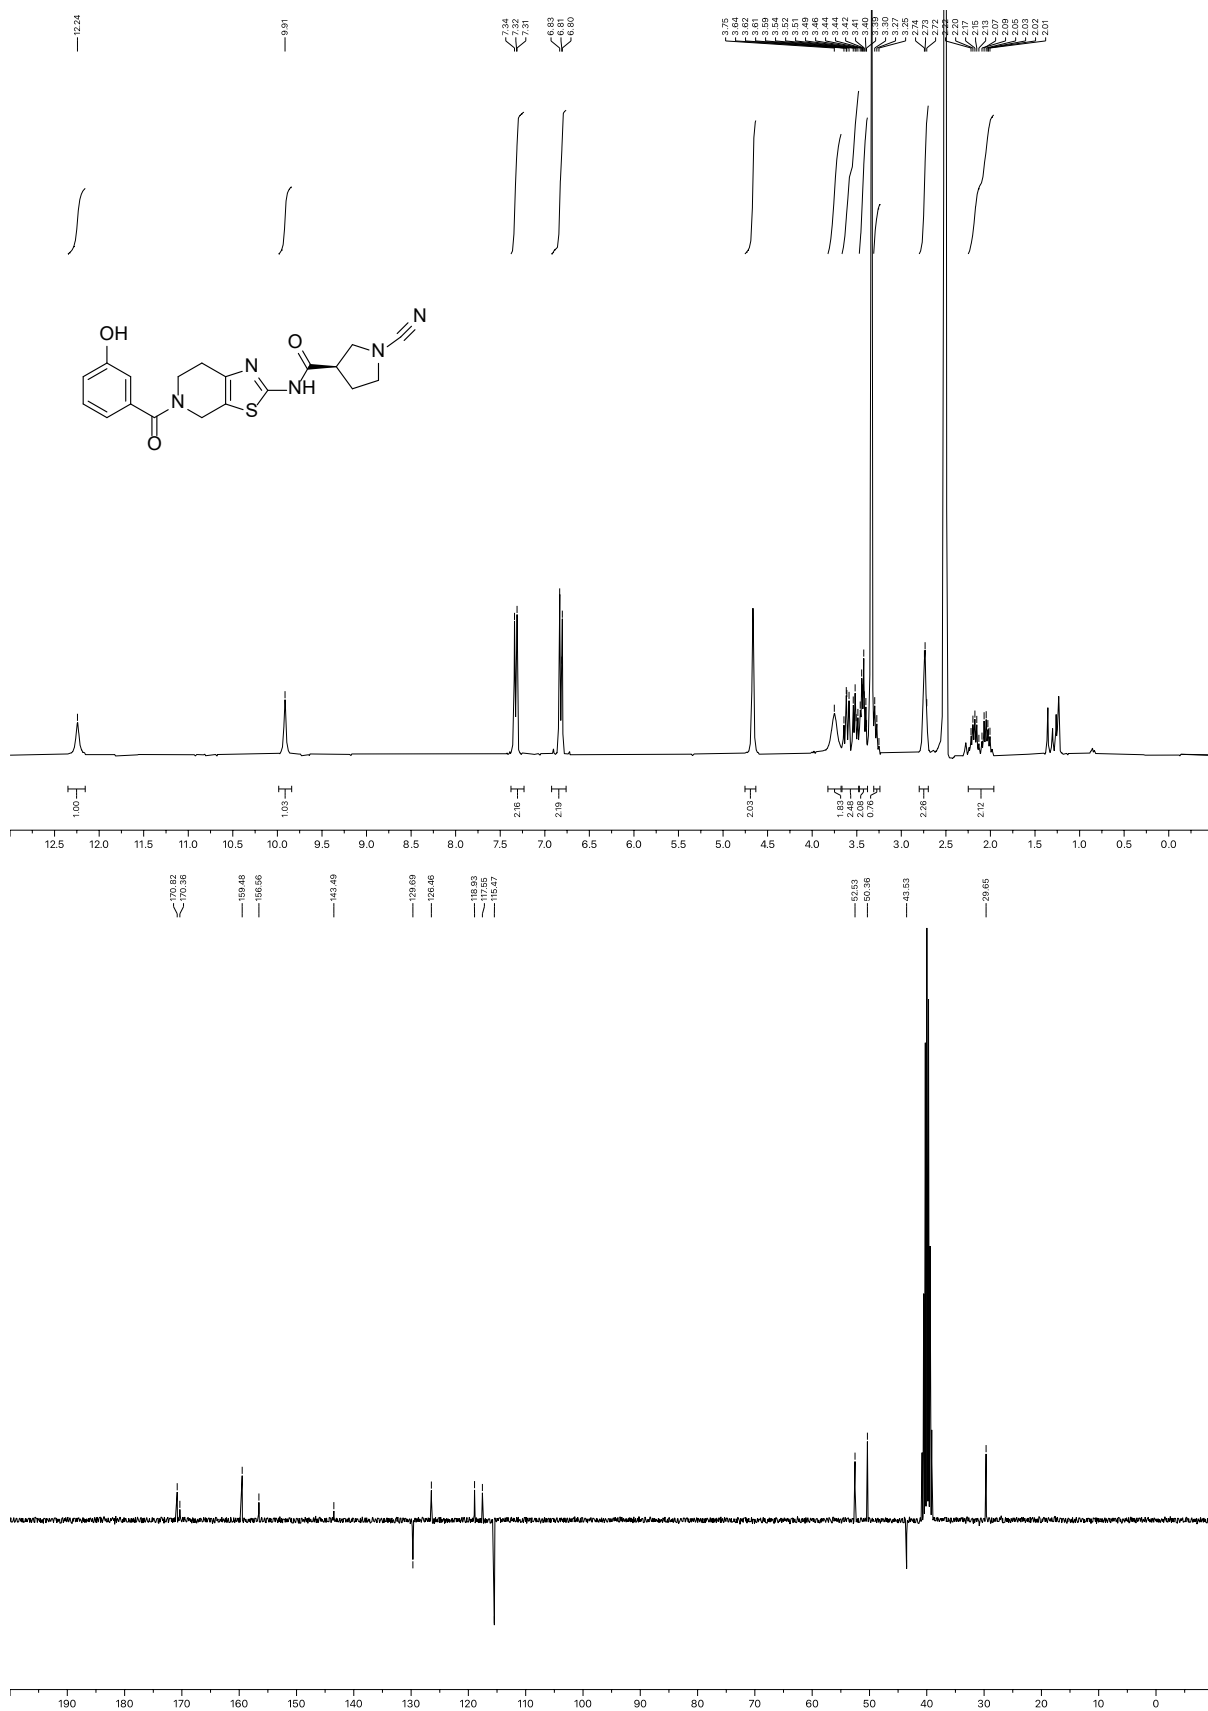

**<sup>1</sup>H-NMR and <sup>13</sup>C-NMR of compound 4 in CD<sub>3</sub>OD.**

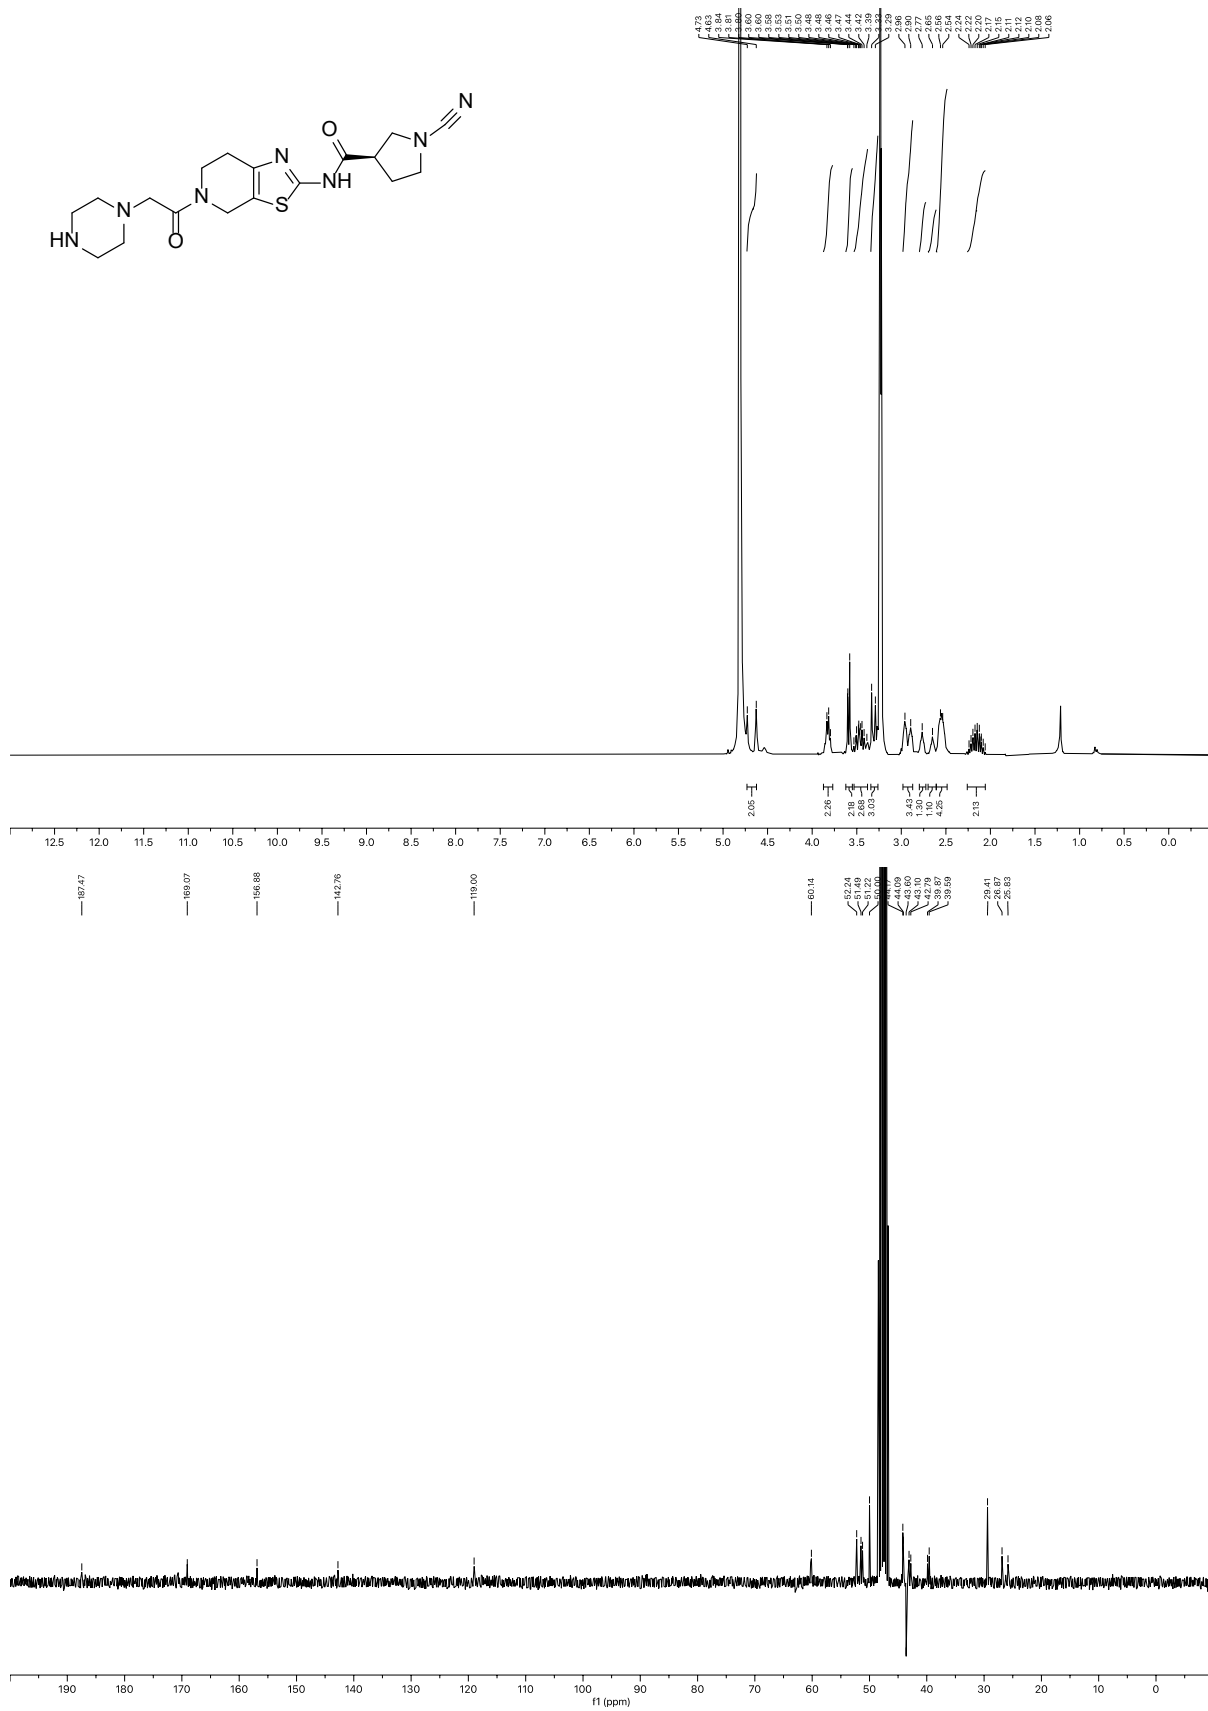

**<sup>1</sup>H-NMR of compound 5 in CD<sub>3</sub>OD.**

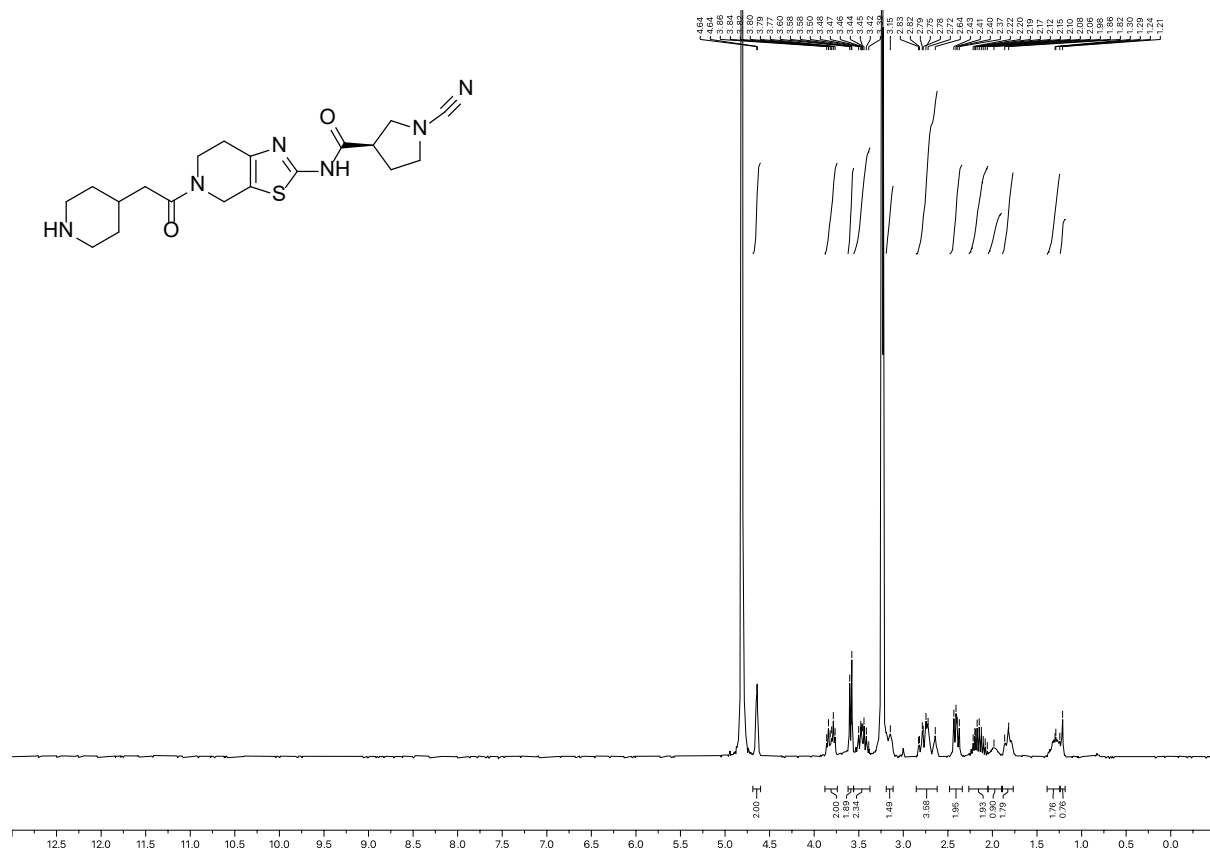

**$^1\text{H-NMR}$  of compound 59 in  $\text{CD}_3\text{OD}$  and  $^{13}\text{C-NMR}$  of compound 59 in  $\text{DMSO}$ .**

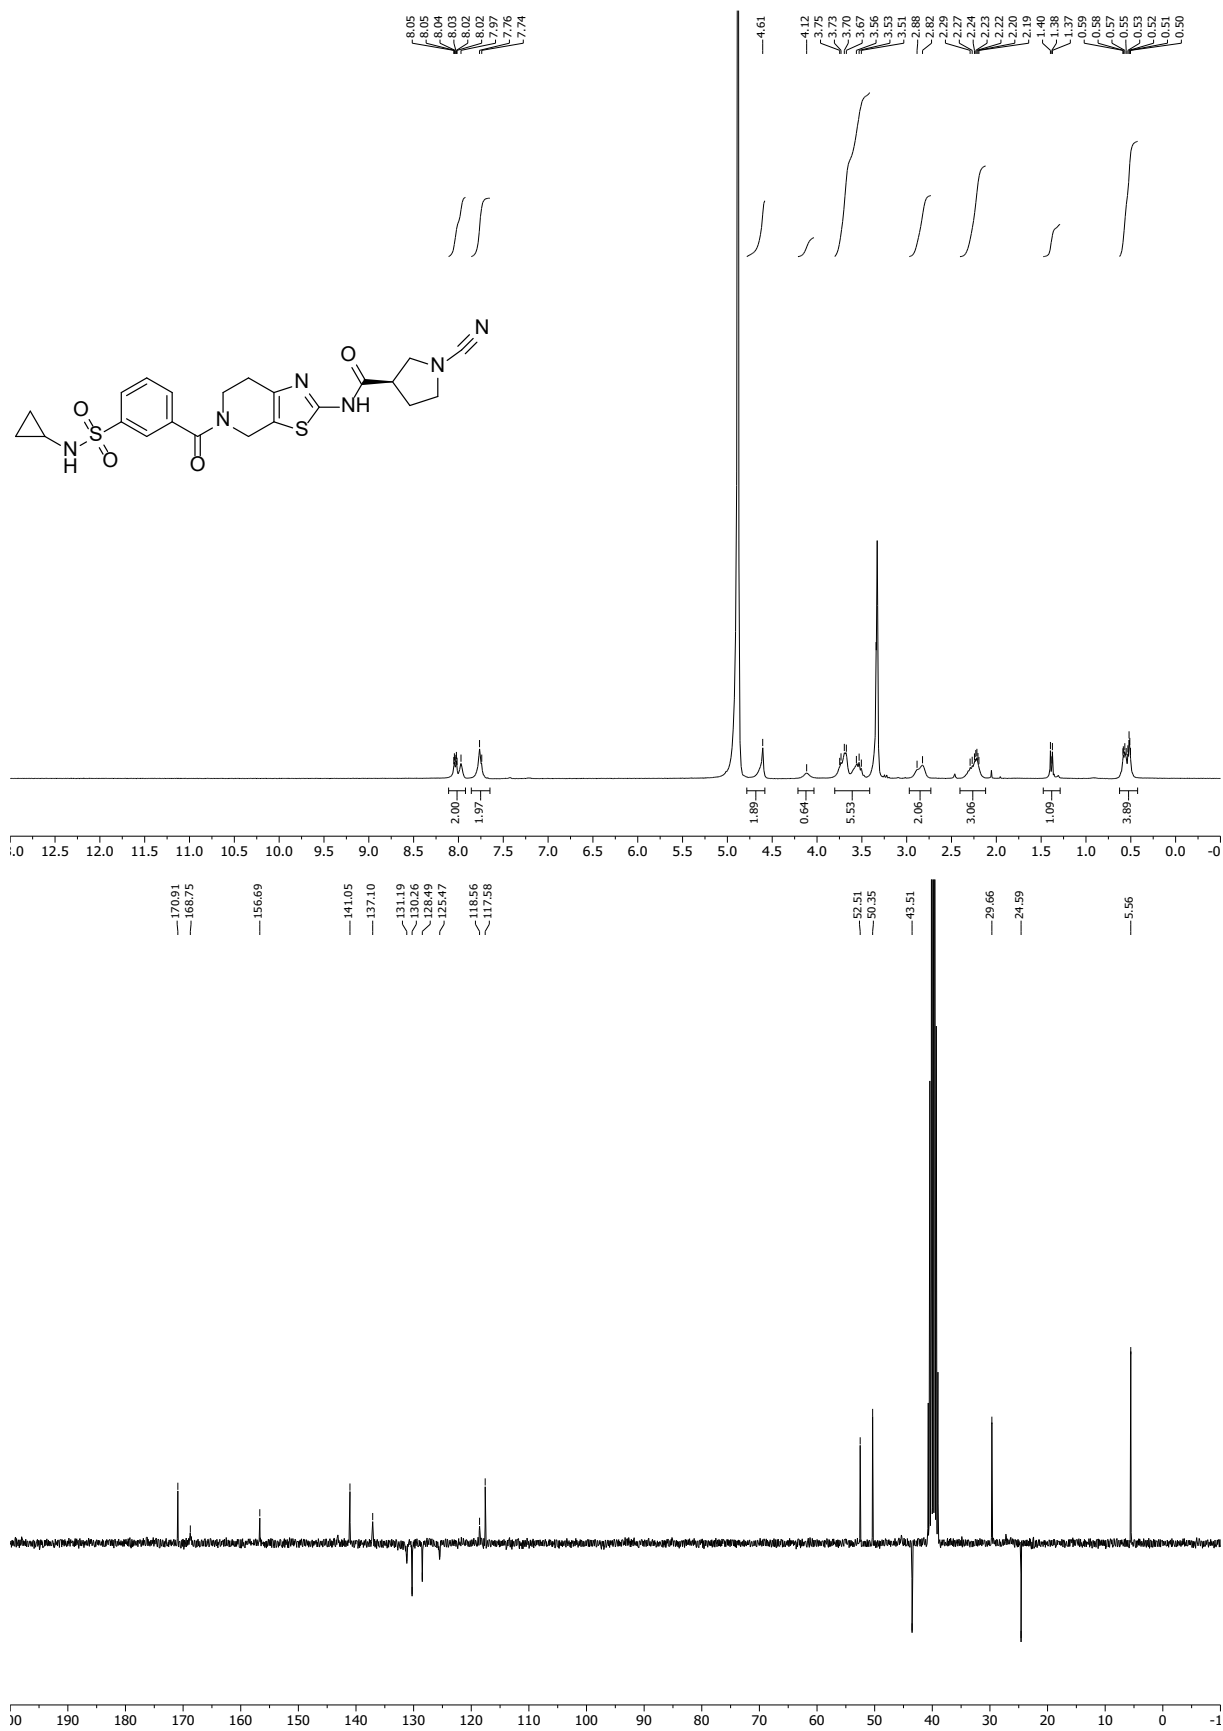

**<sup>1</sup>H-NMR and <sup>13</sup>C-NMR of compound 340 (JYQ-164) in DMSO.**

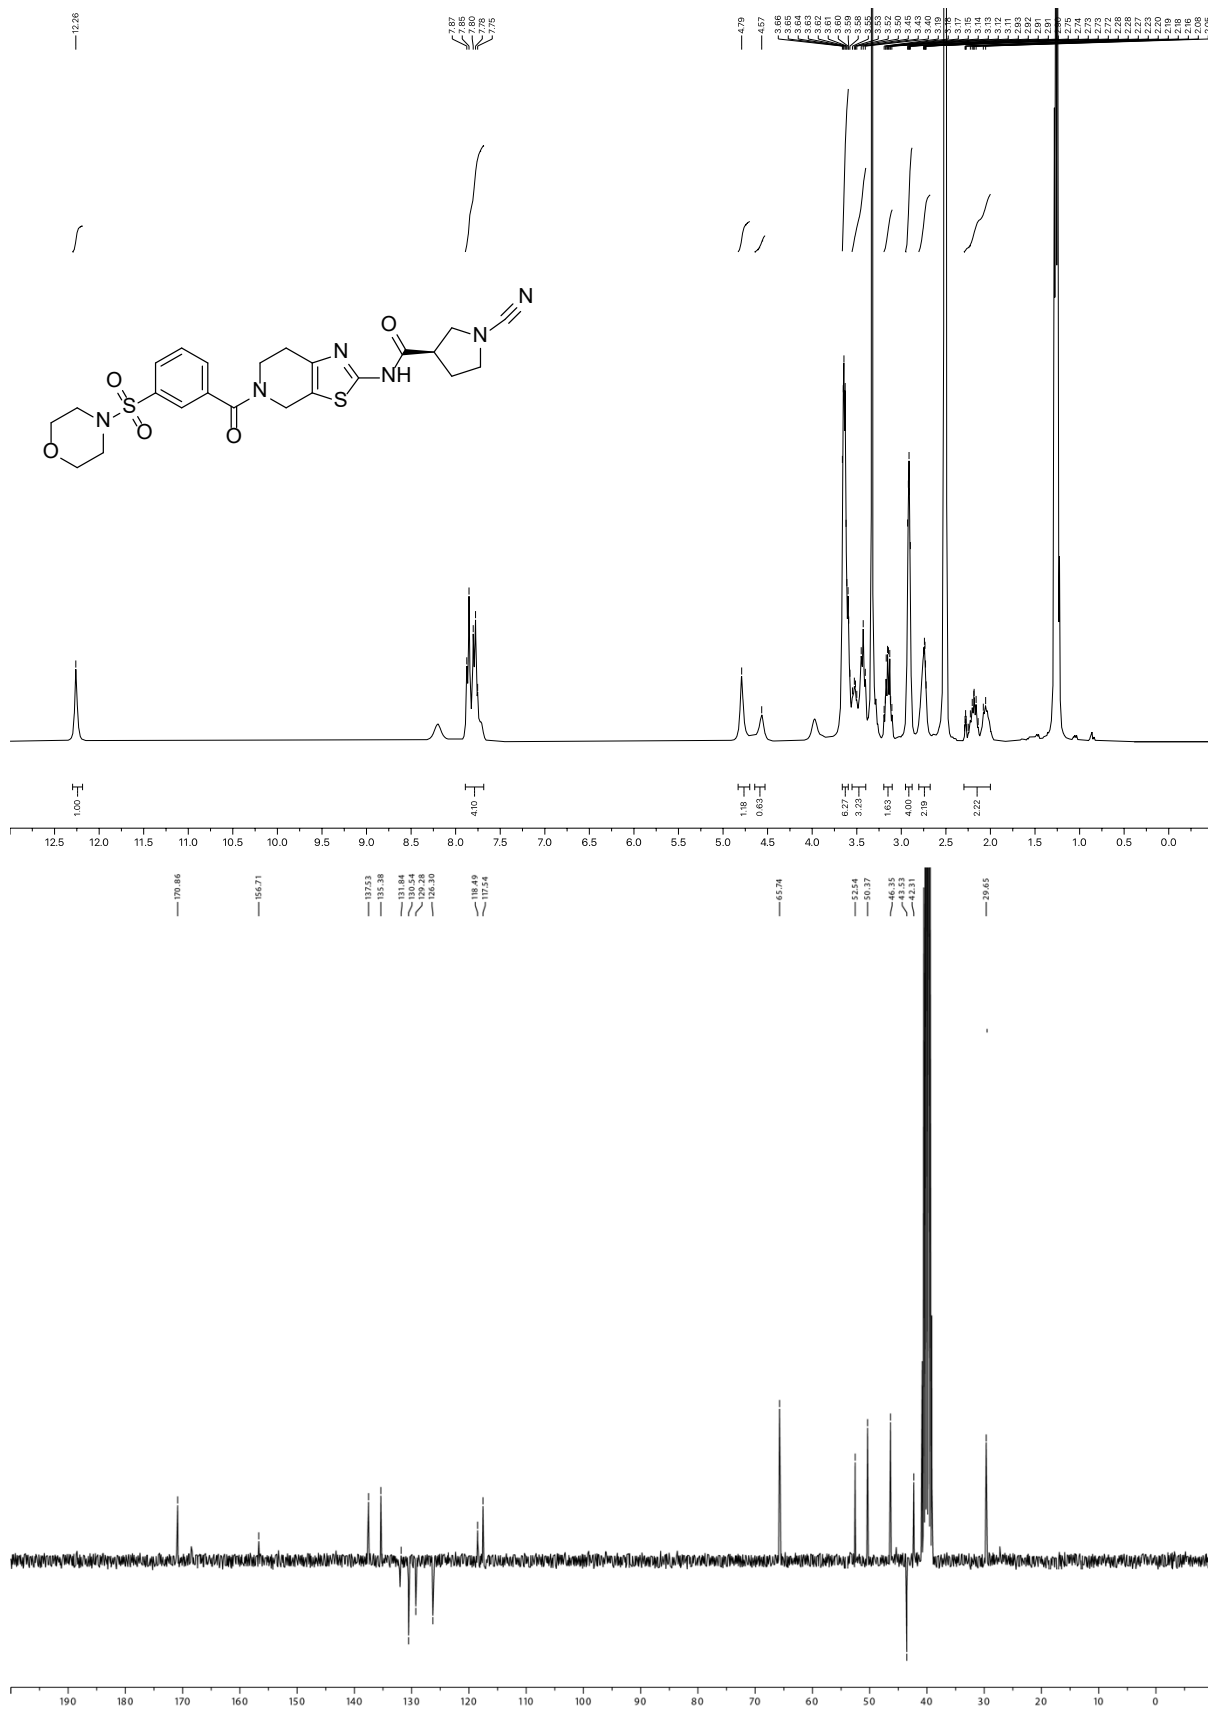

**$^1\text{H-NMR}$  and  $^{13}\text{C-NMR}$  of compound 415 in DMSO.**

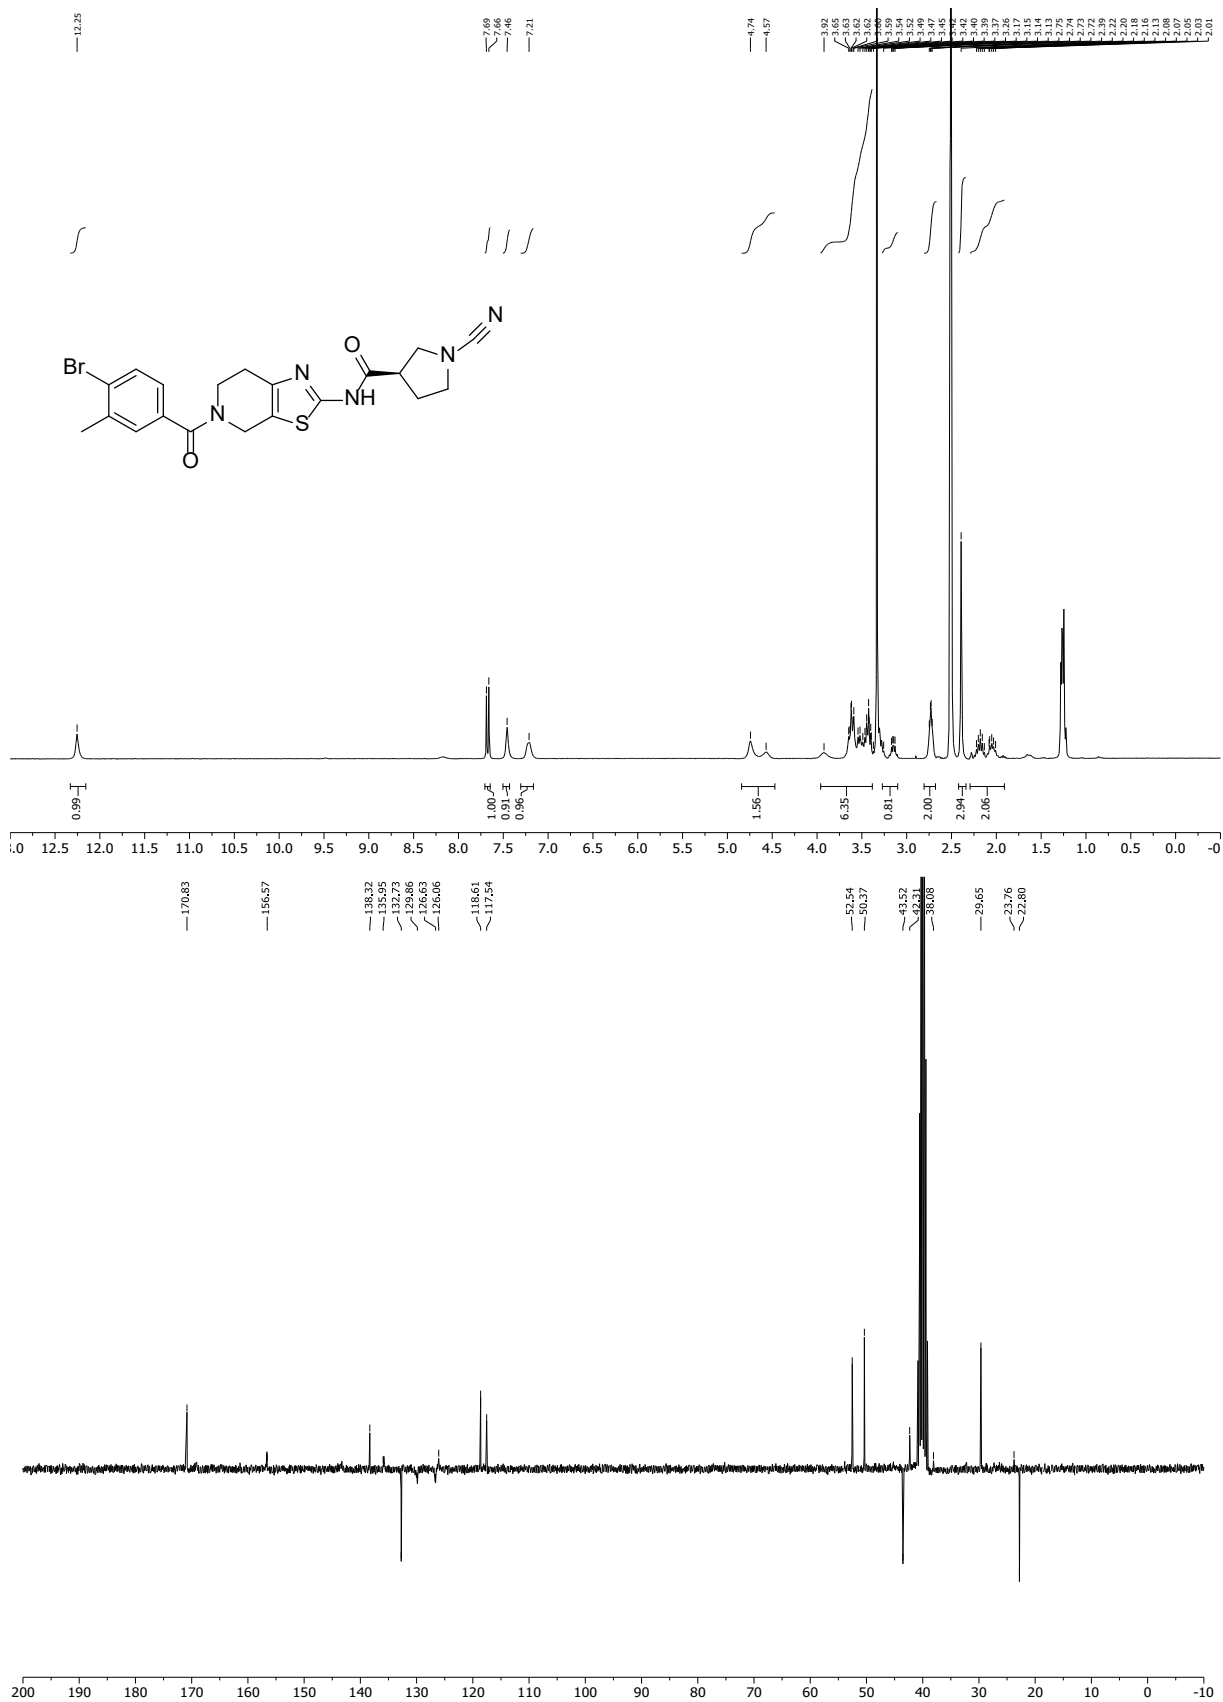

**<sup>1</sup>H-NMR and <sup>13</sup>C-NMR of compound 336 in DMSO.**

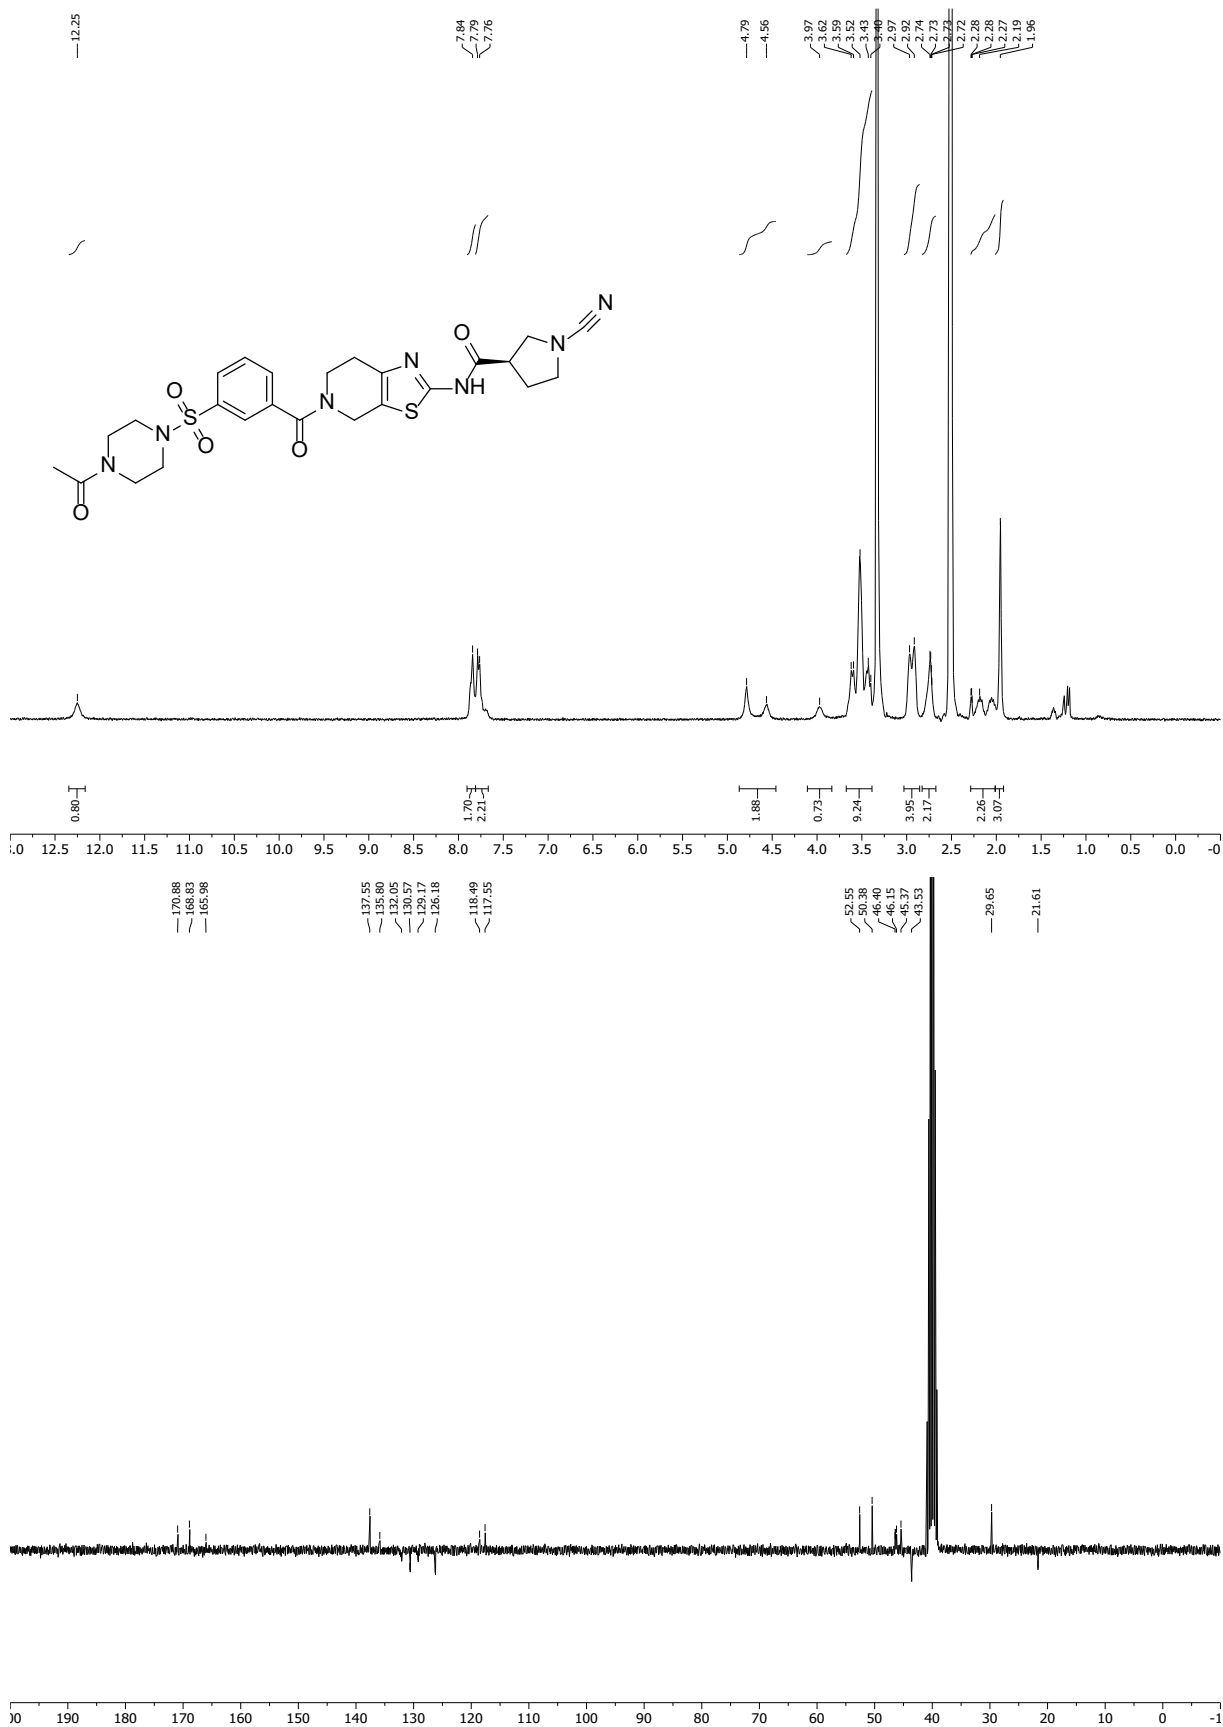





**<sup>1</sup>H-NMR and <sup>13</sup>C-NMR of compound 55 in DMSO.**

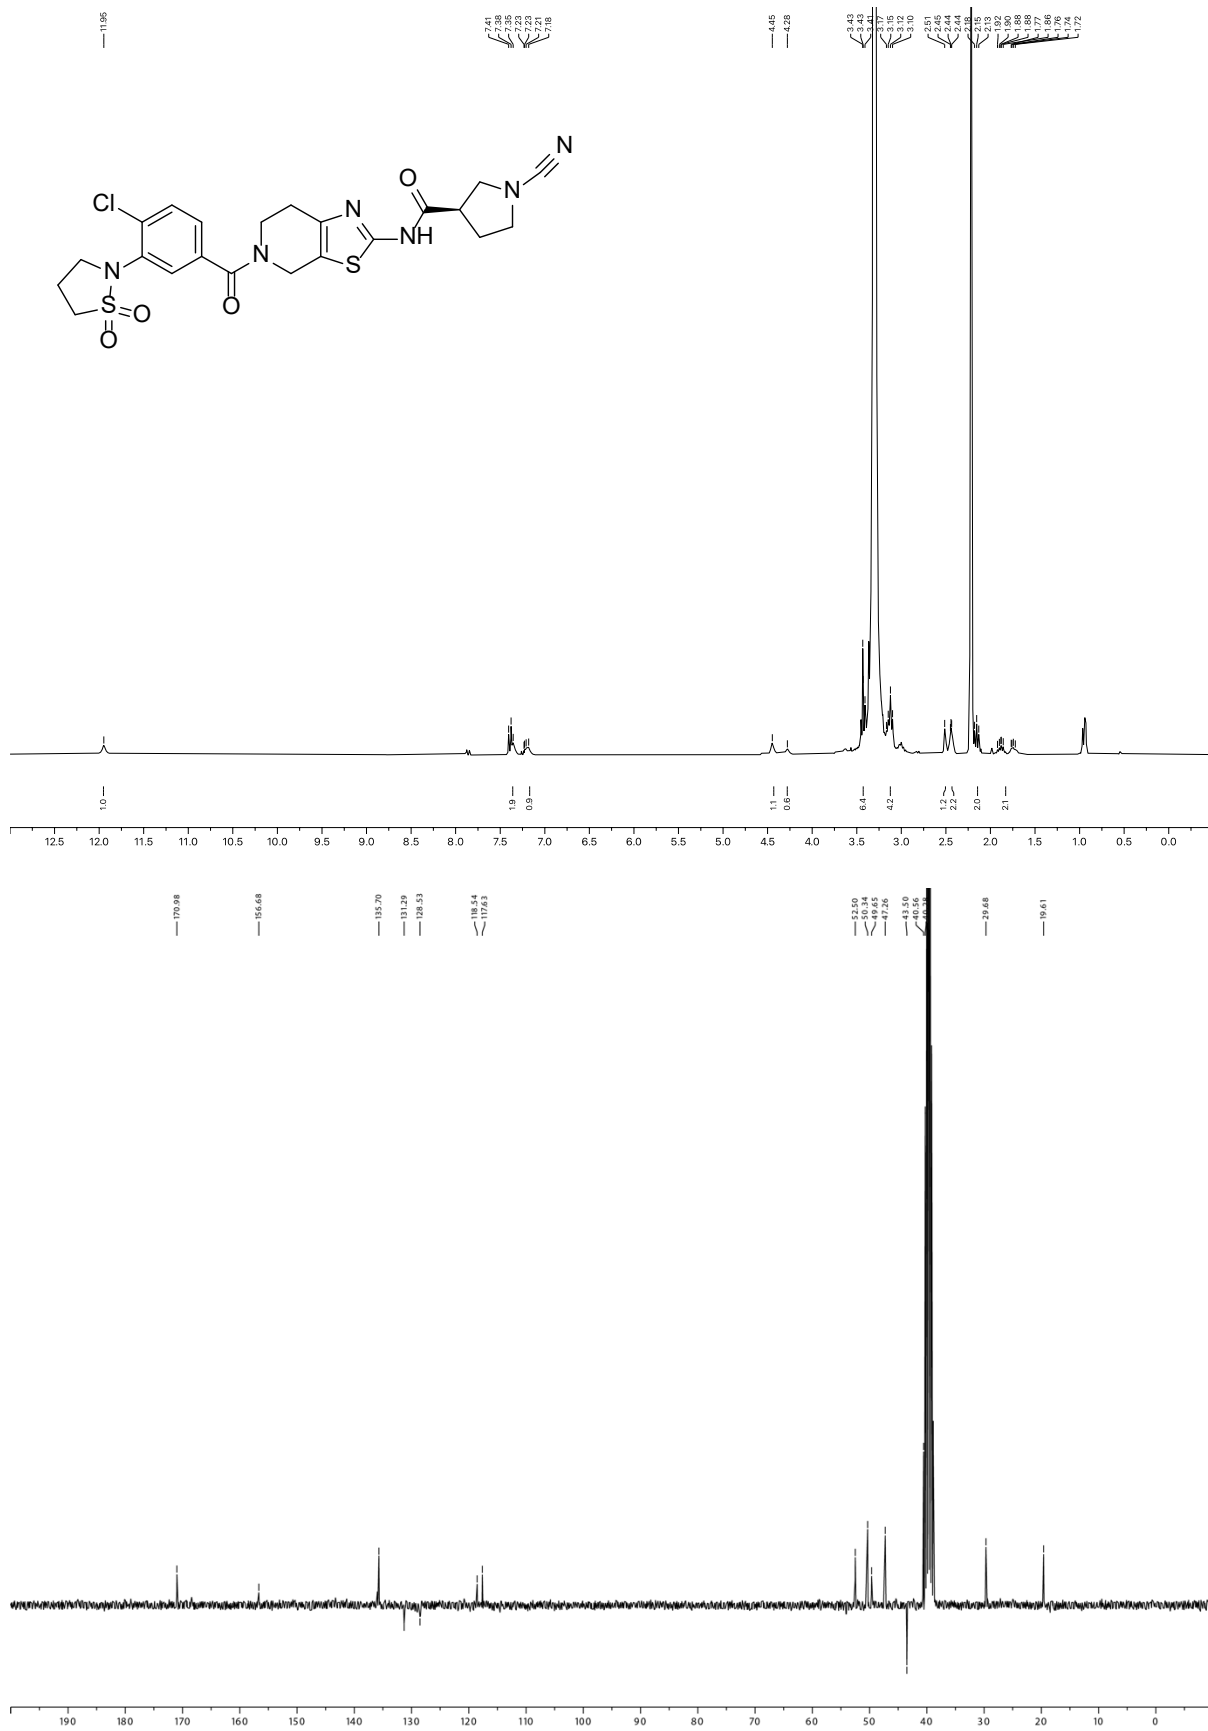

**<sup>1</sup>H-NMR and <sup>13</sup>C-NMR of compound 108 in DMSO.**

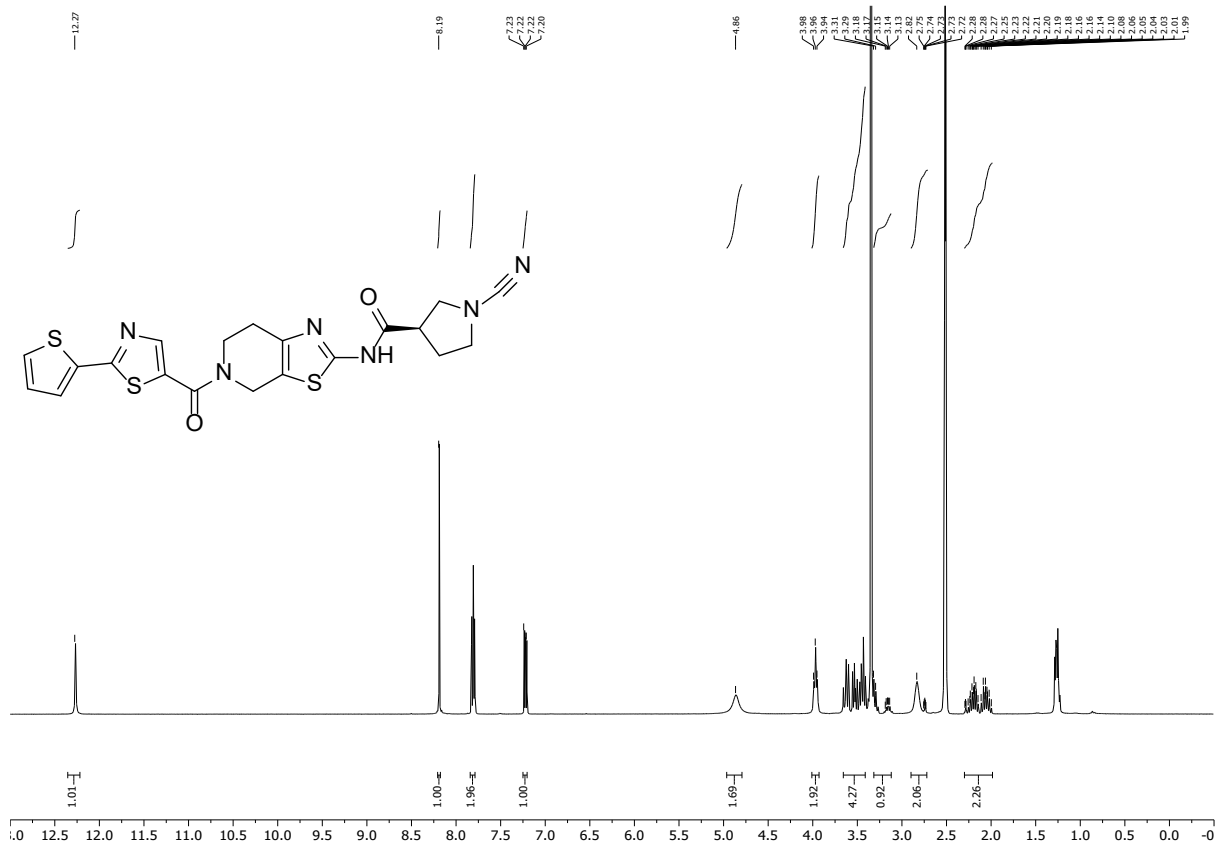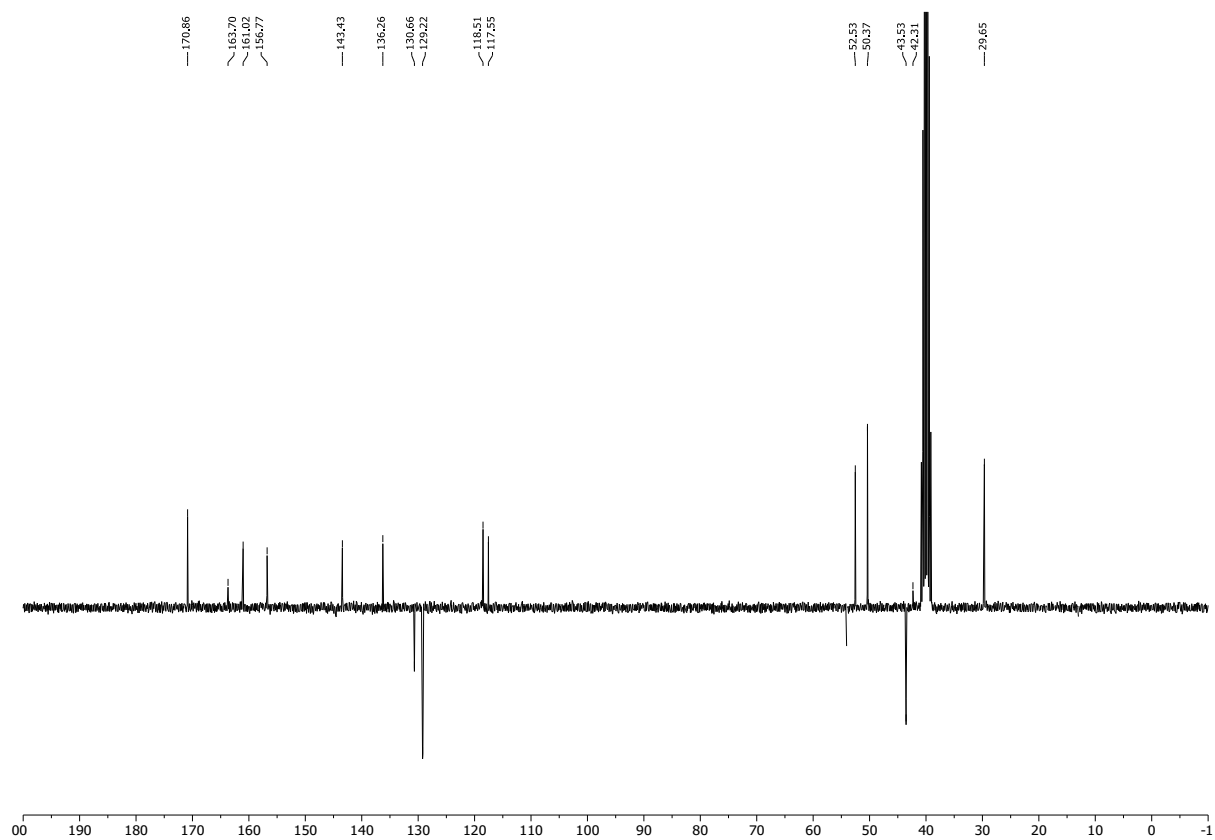

**<sup>1</sup>H-NMR and <sup>13</sup>C-NMR of compound 334 in DMSO.**

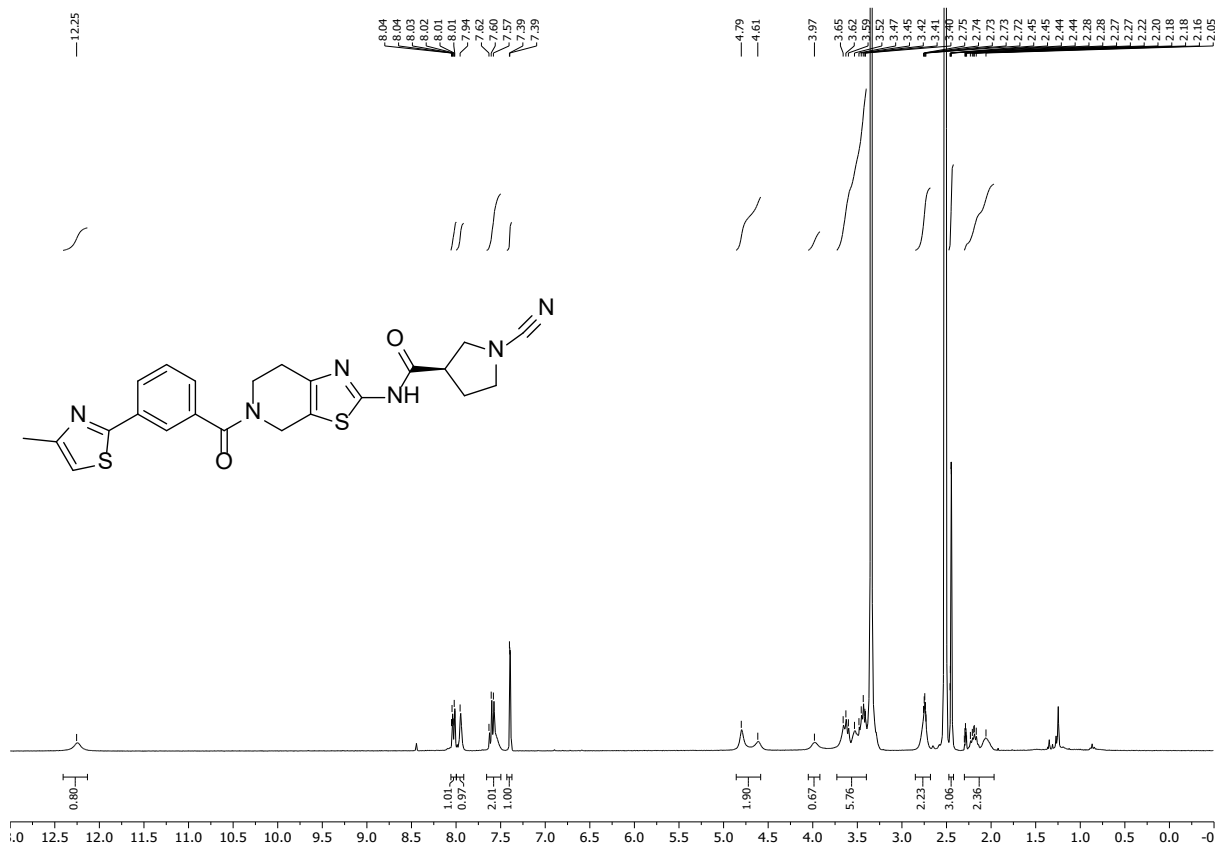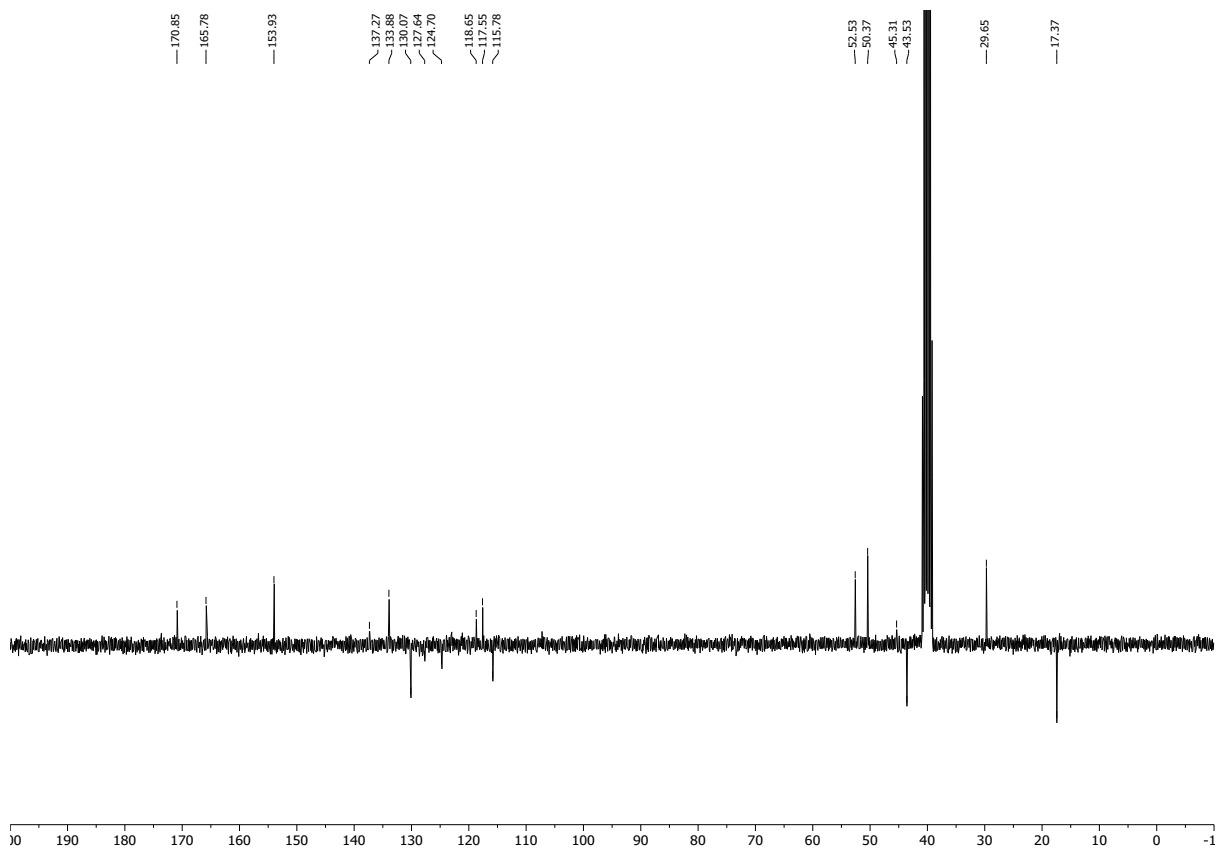

**<sup>1</sup>H-NMR and <sup>13</sup>C-NMR of compound 199 in DMSO.**

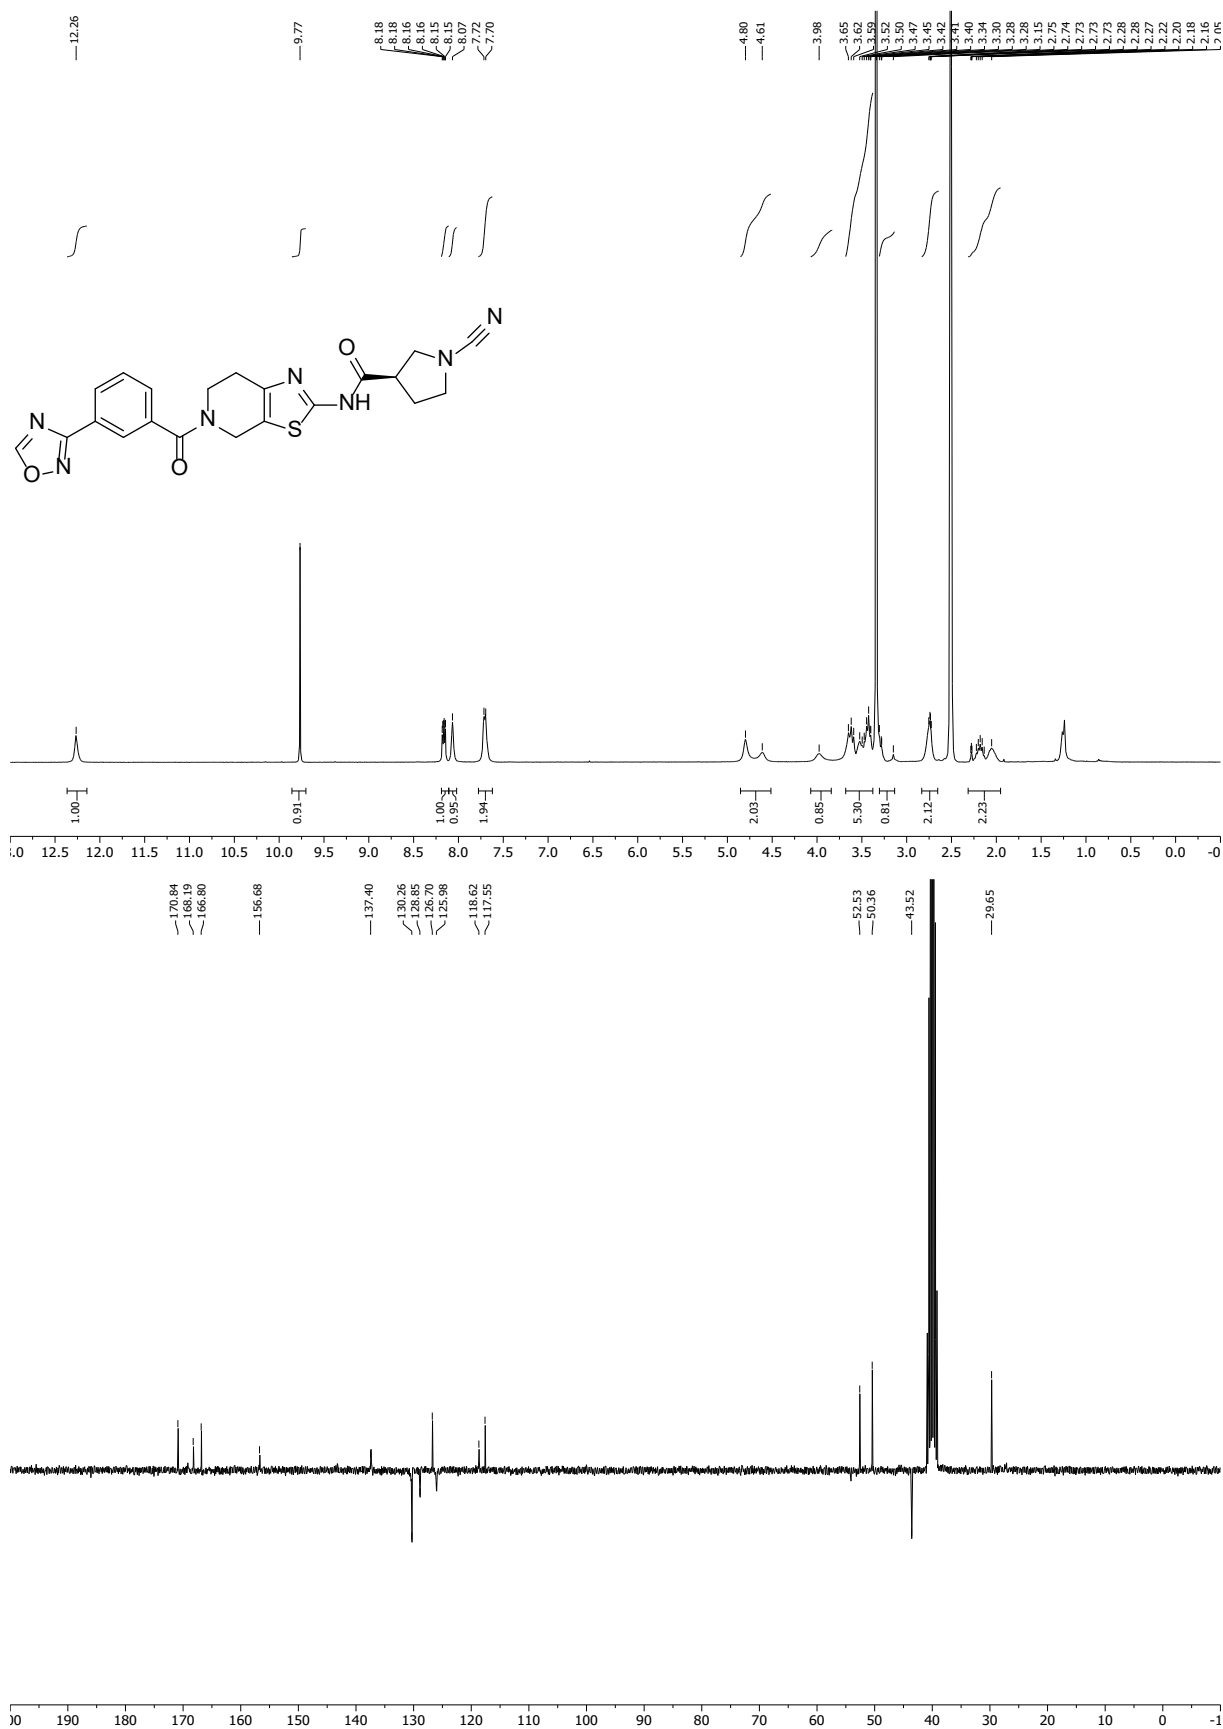

**<sup>1</sup>H-NMR and <sup>13</sup>C-NMR of compound 84 (JYQ-173) in DMSO.**

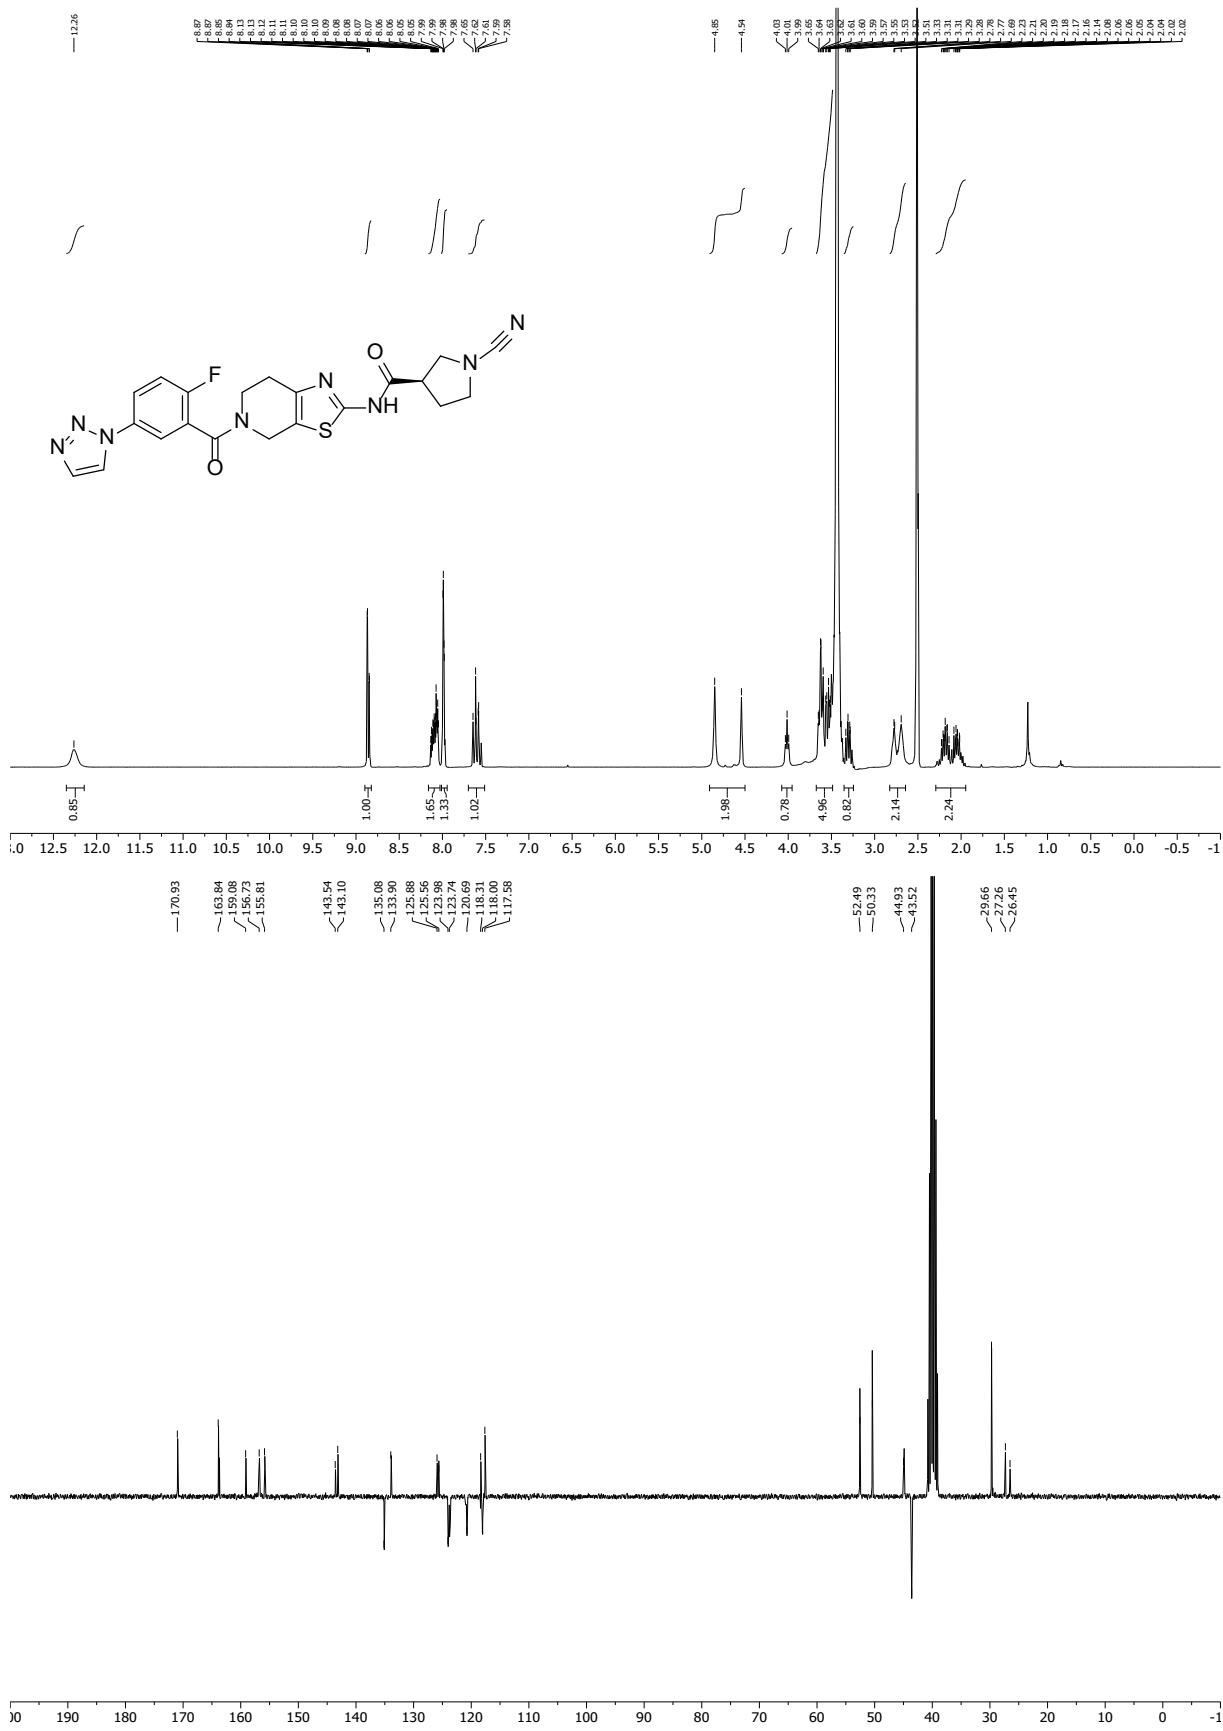

**<sup>1</sup>H-NMR and <sup>13</sup>C-NMR of compound 482 in DMSO.**

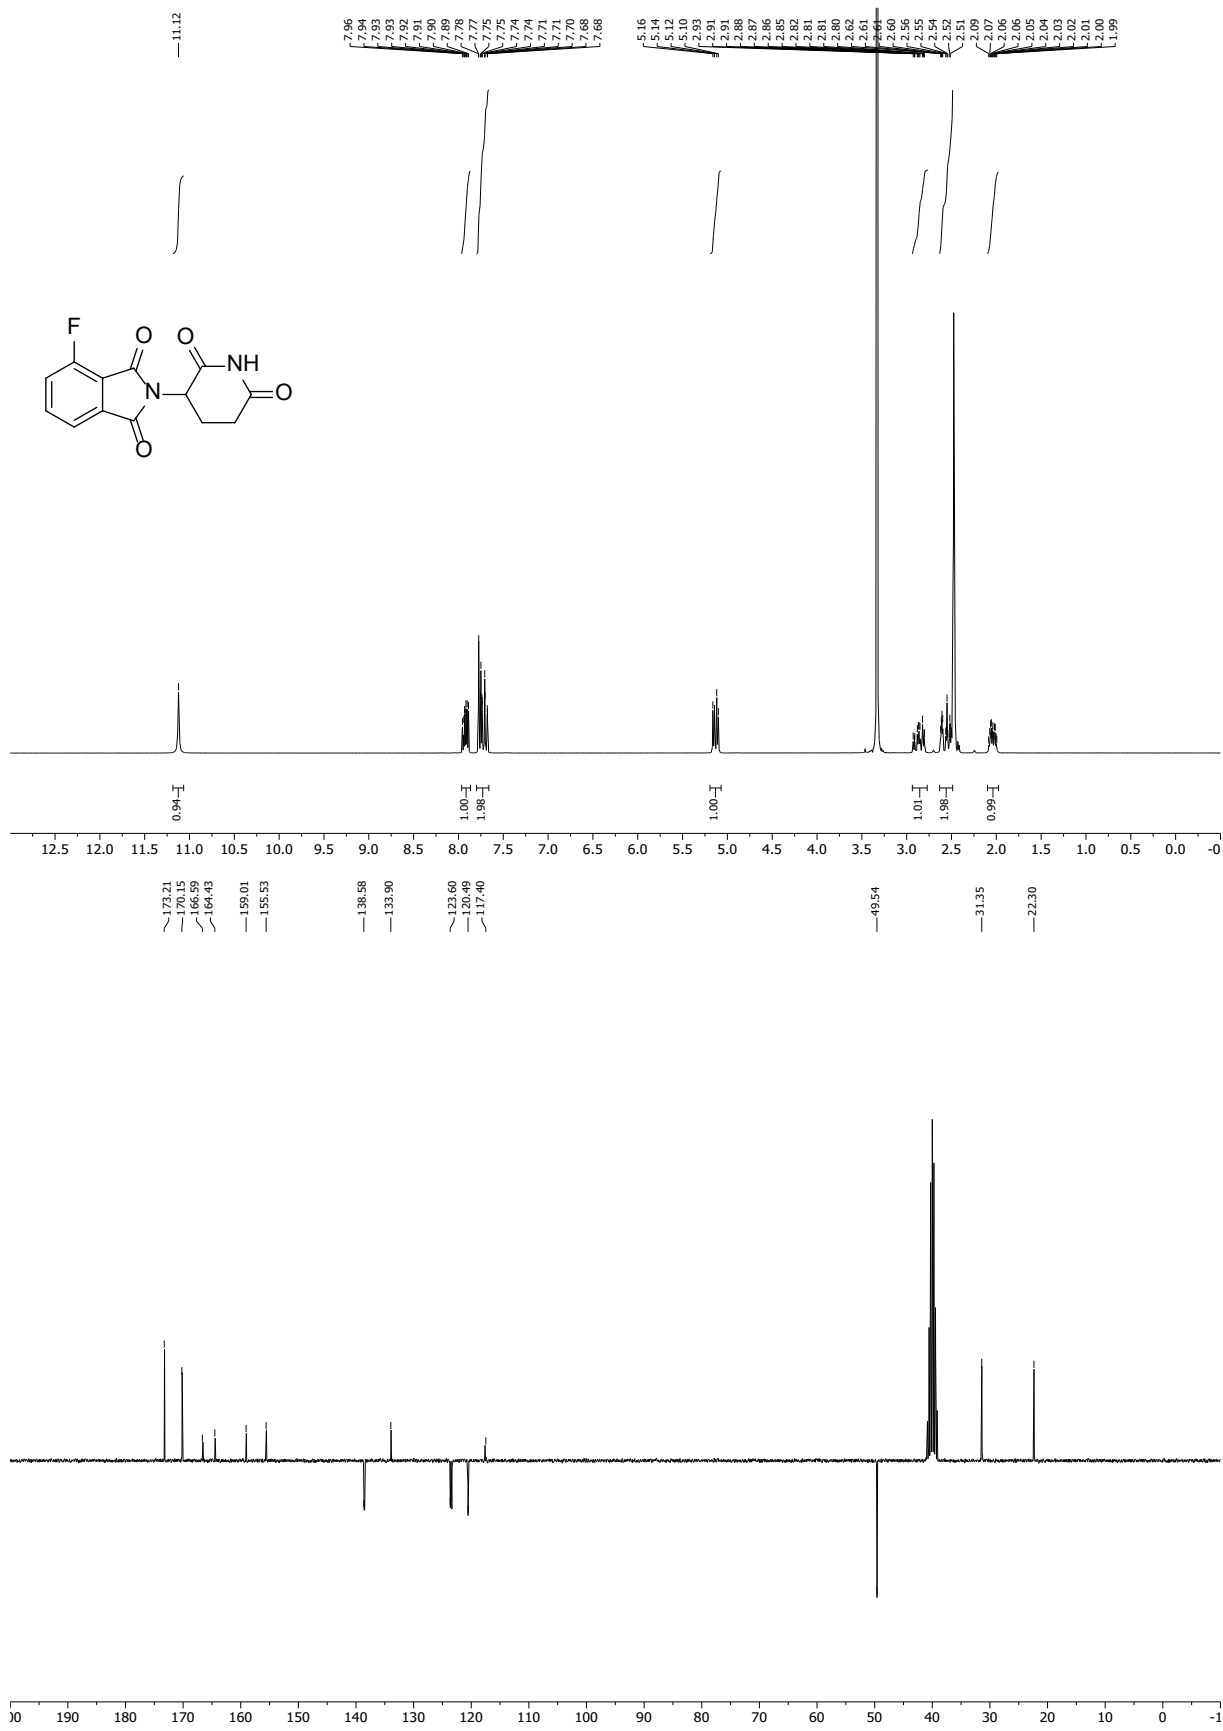

**<sup>1</sup>H-NMR and <sup>13</sup>C-NMR of compound 483a in CDCl<sub>3</sub>.**

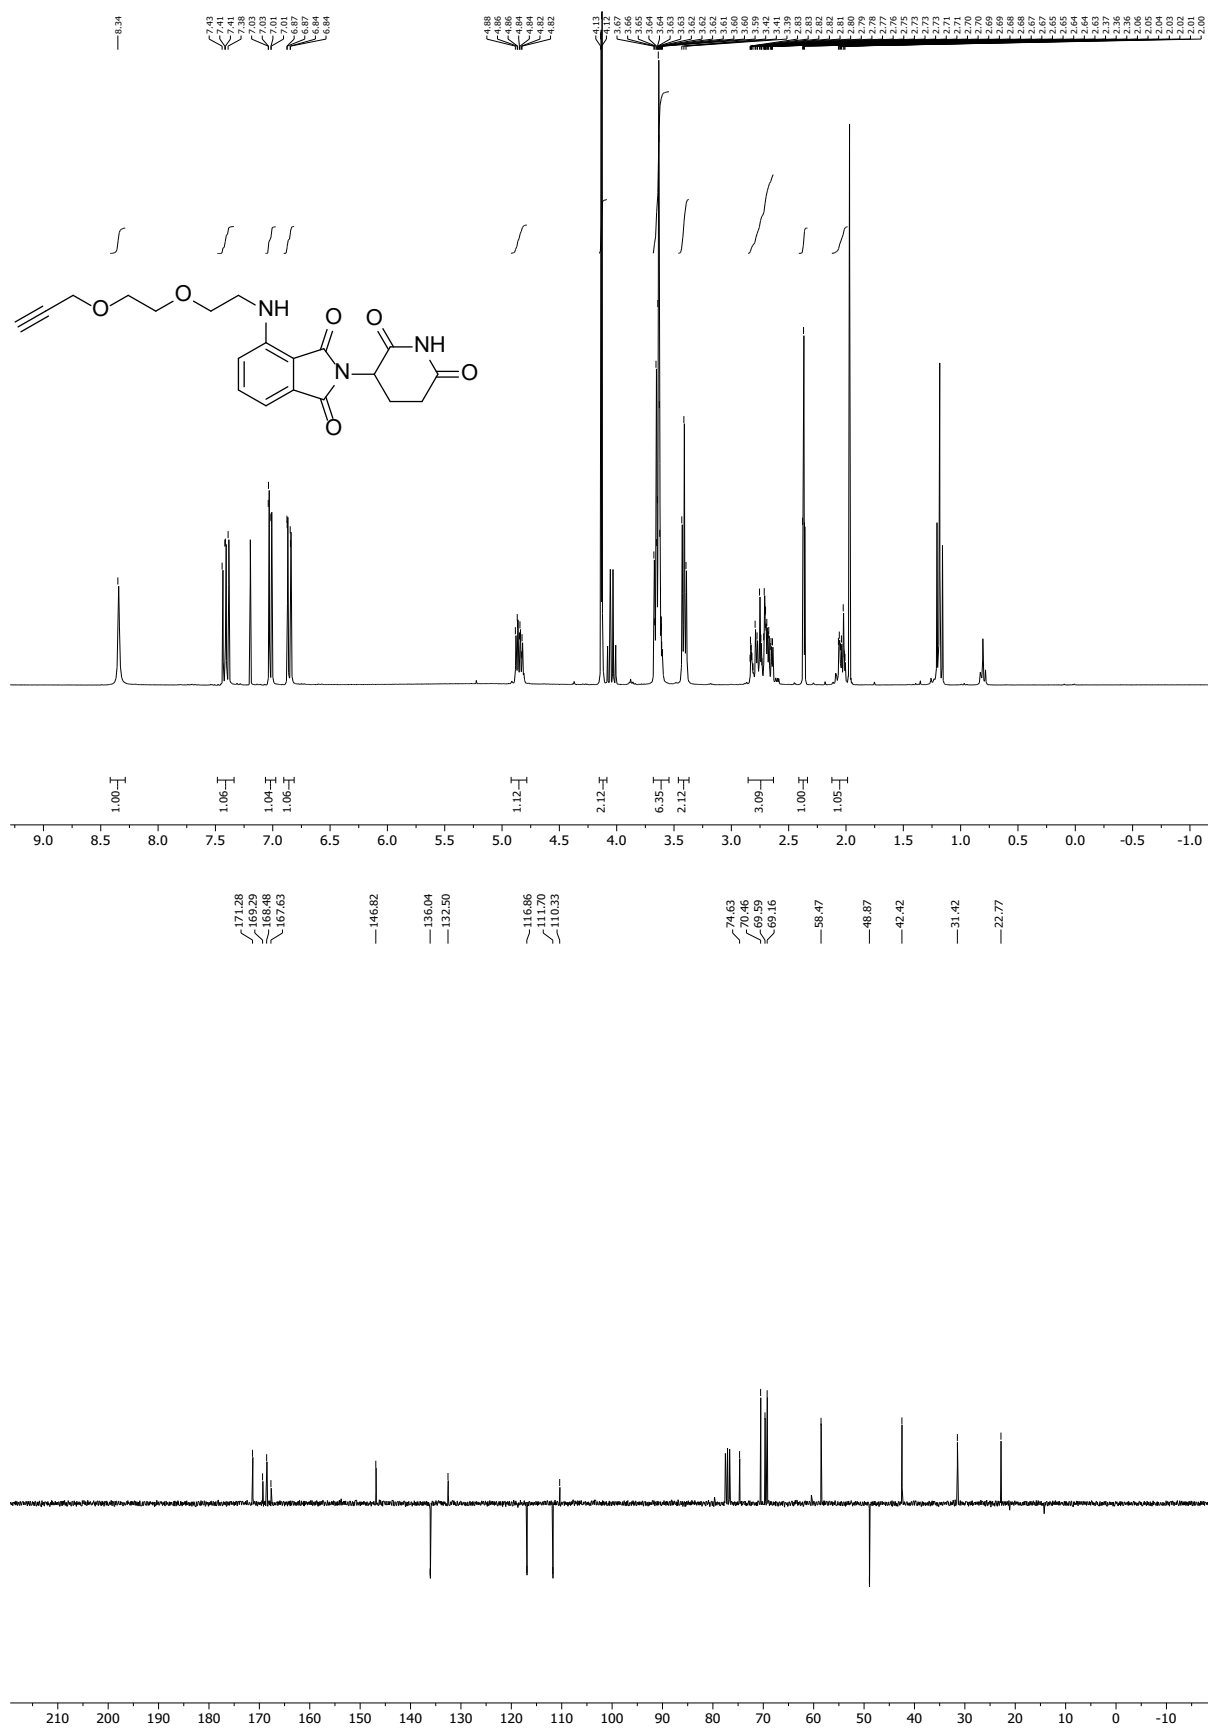

**<sup>1</sup>H-NMR and <sup>13</sup>C-NMR of compound 477 in CDCl<sub>3</sub>.**

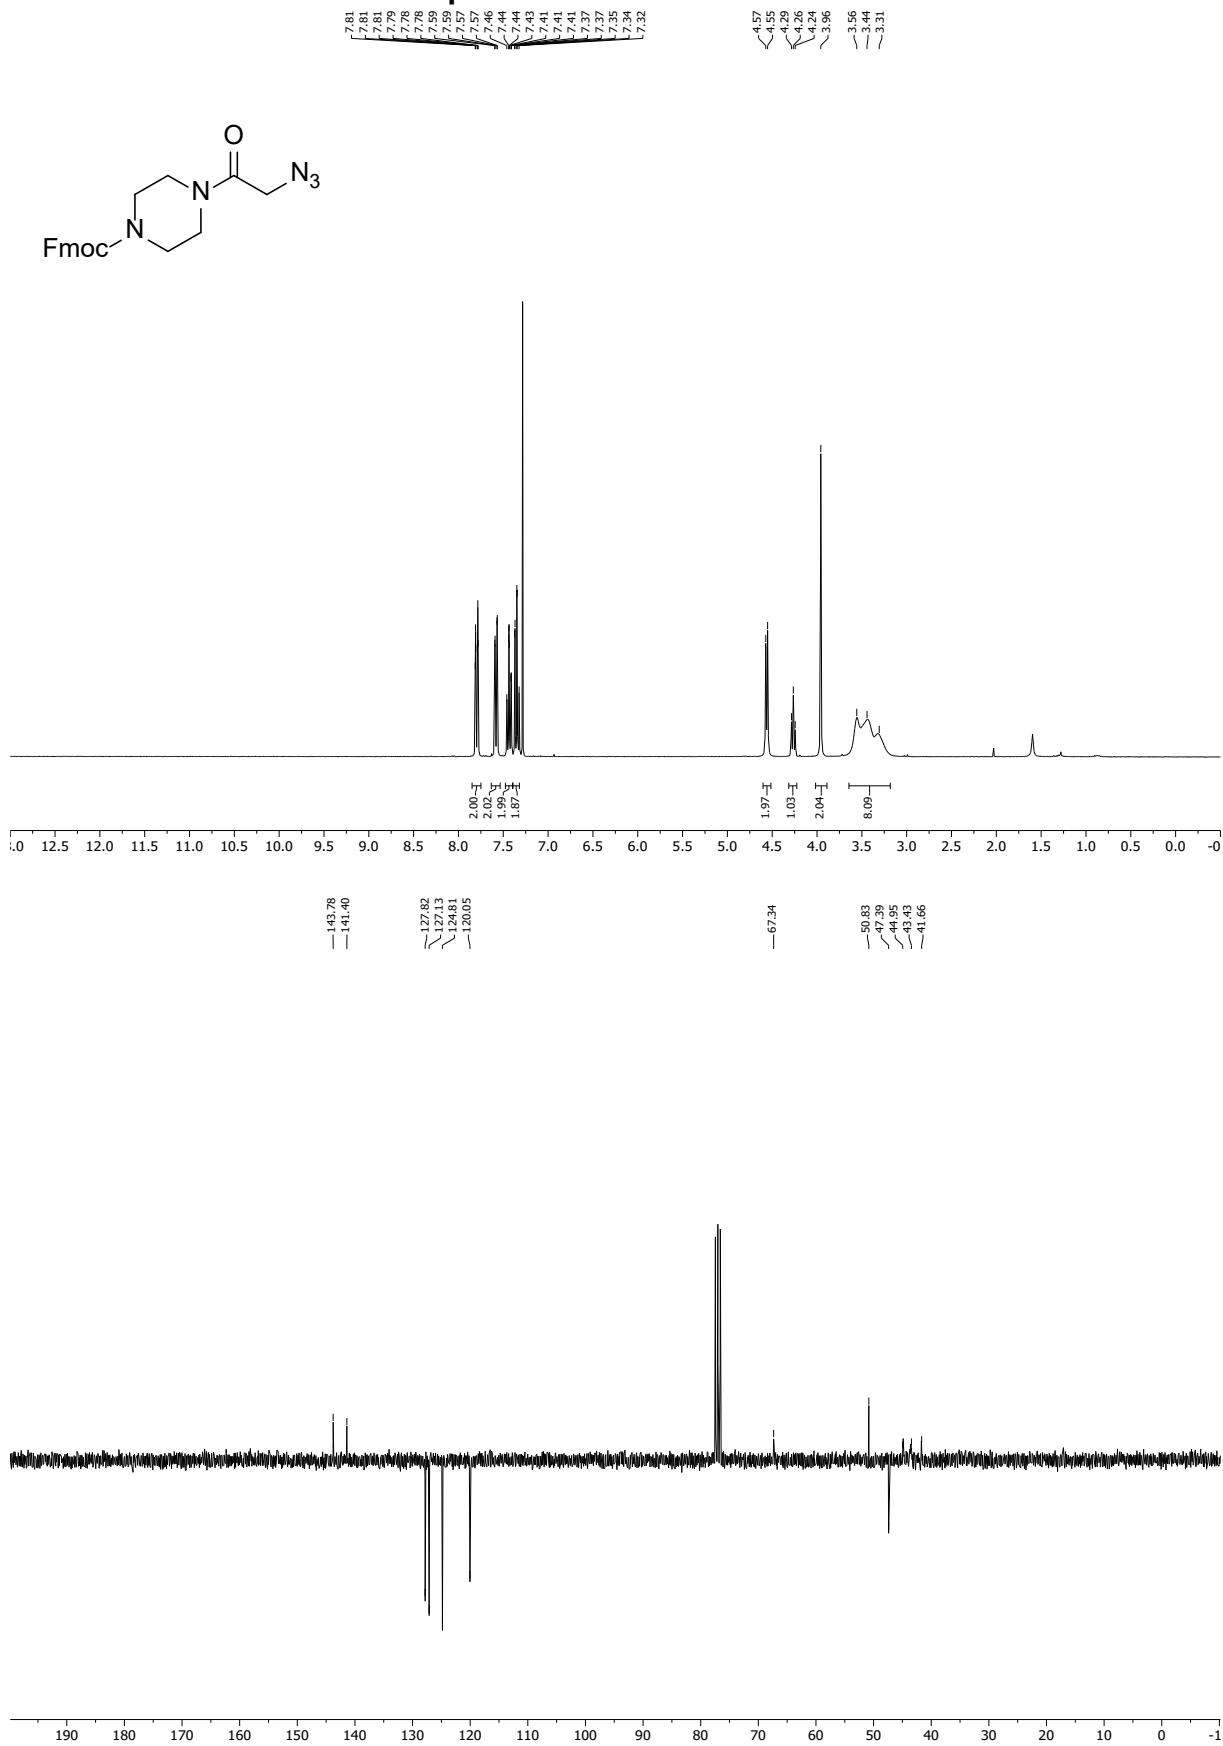



**<sup>1</sup>H-NMR and <sup>13</sup>C-NMR of compound 479 in DMSO.**

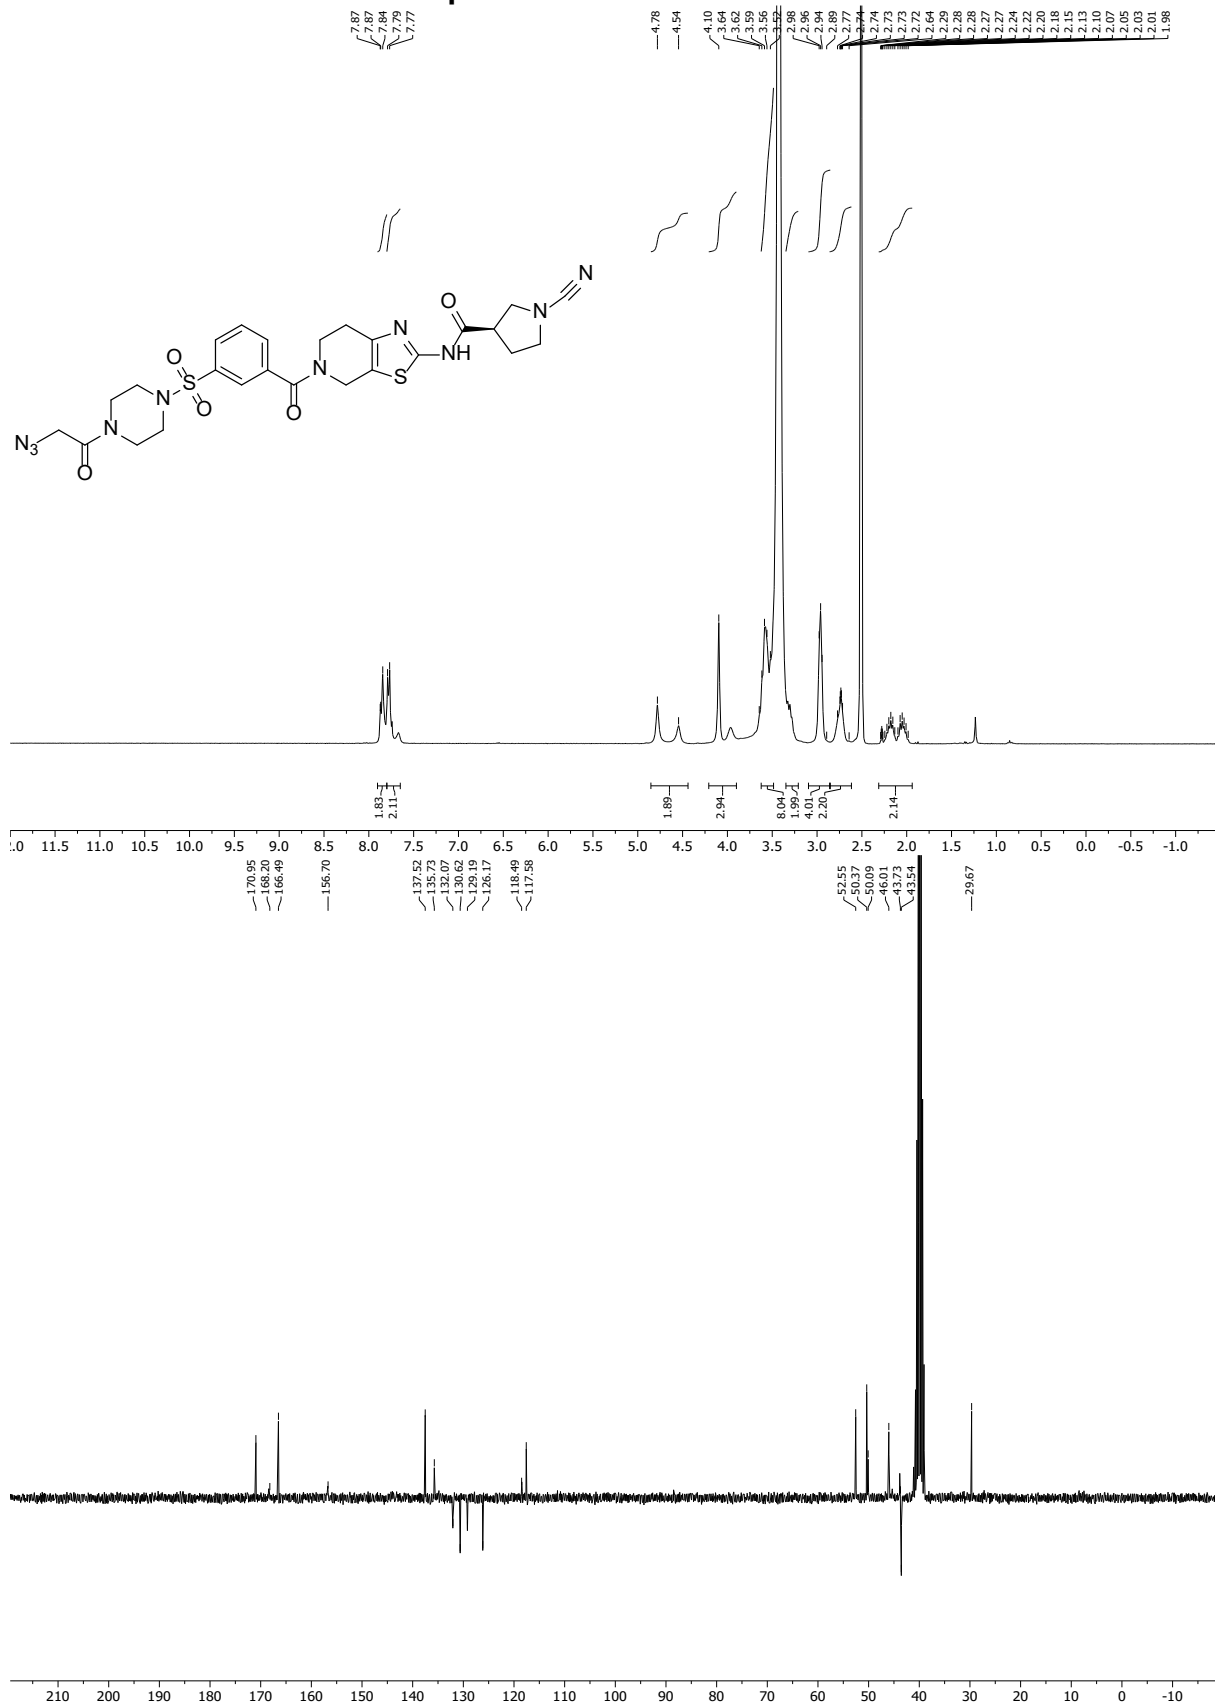

**<sup>1</sup>H-NMR and <sup>13</sup>C-NMR of compound JYQ-187 in DMSO.**

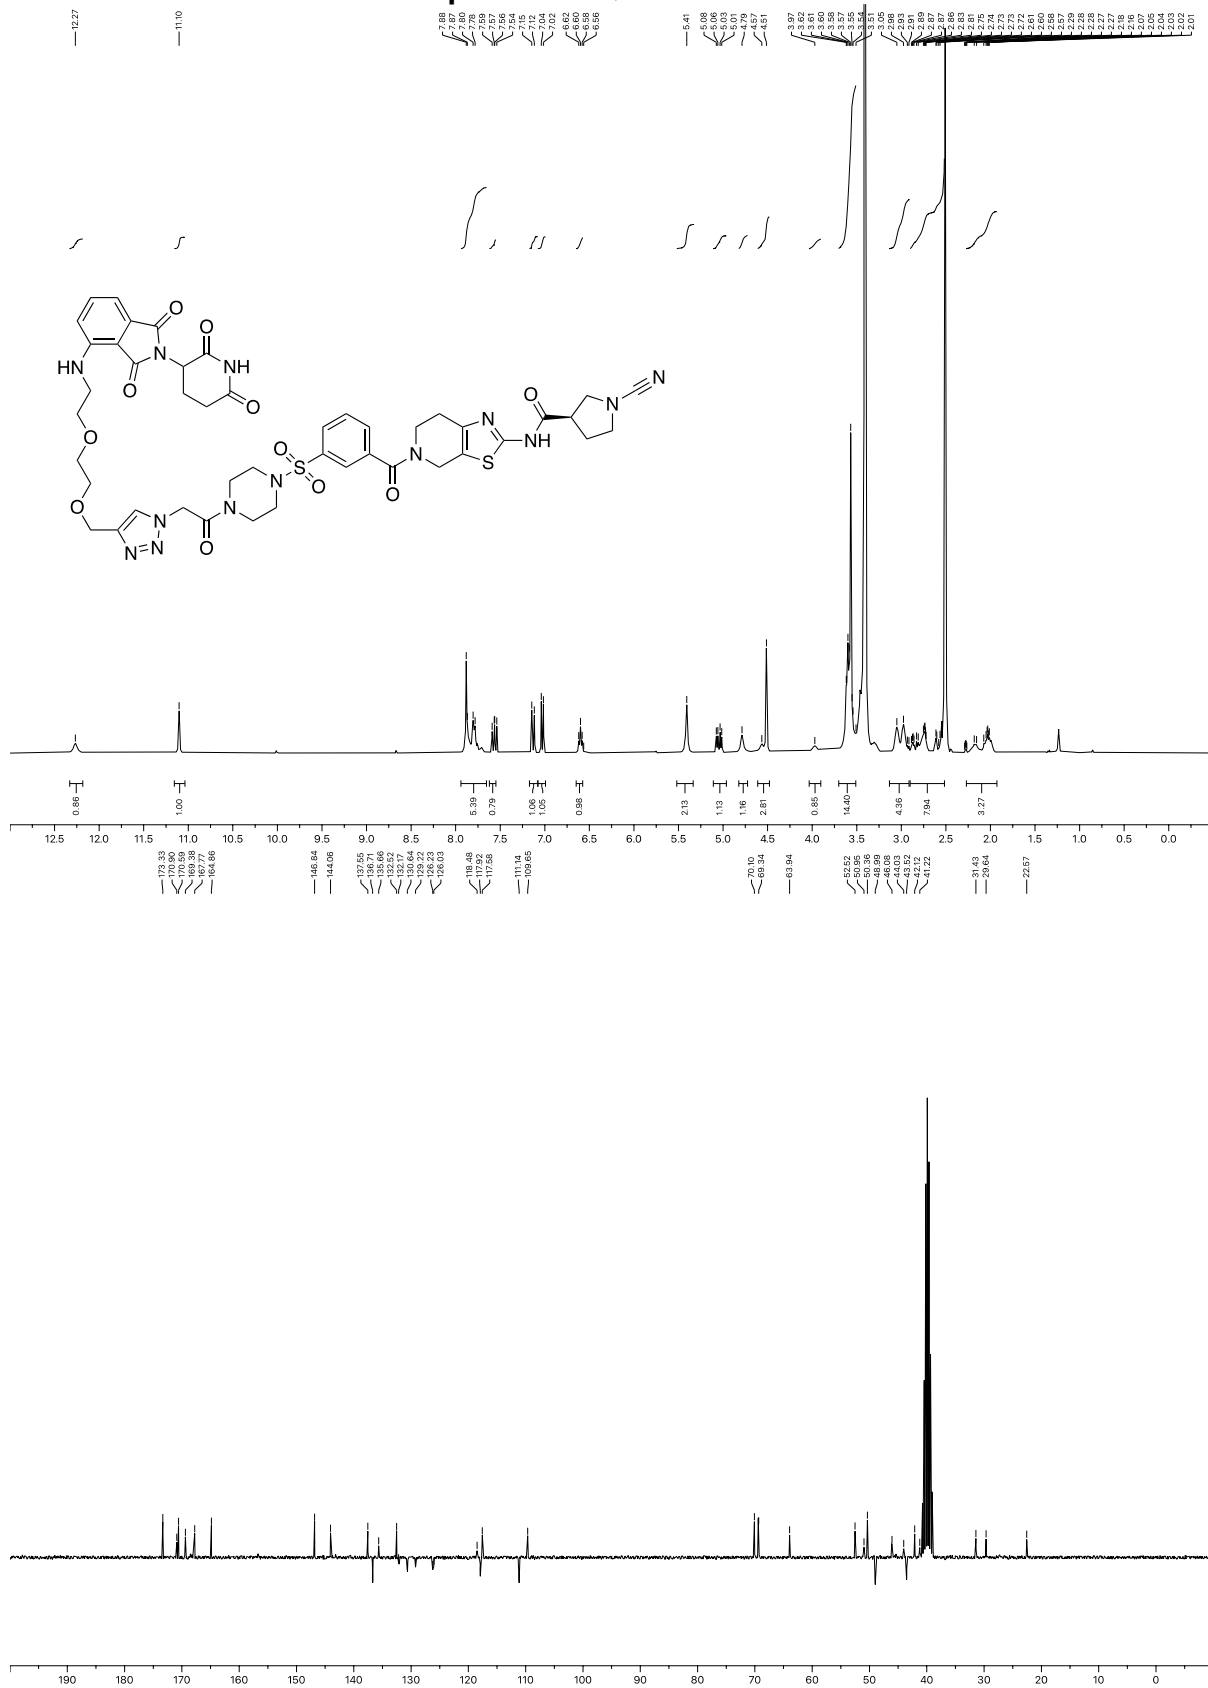

# <sup>1</sup>H-NMR and <sup>13</sup>C-NMR of compound JYQ-188 in DMSO.

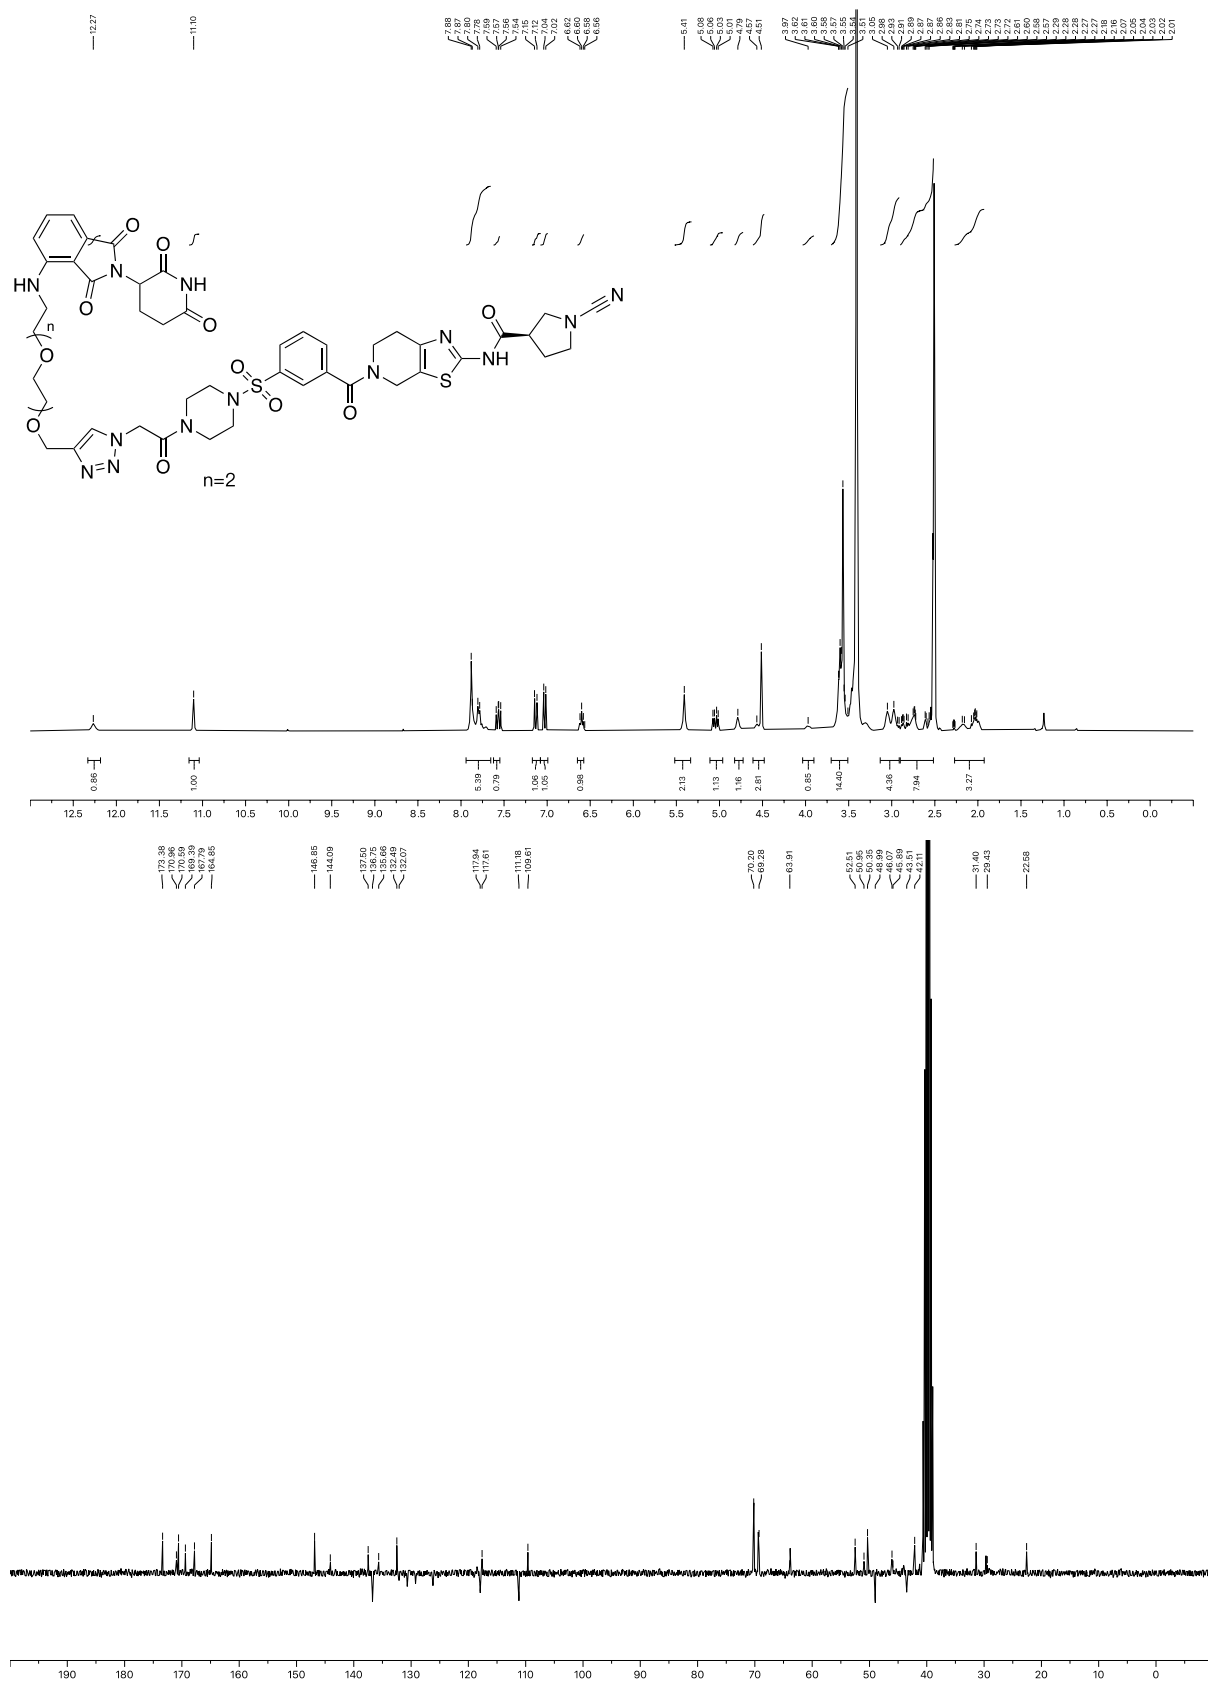

**<sup>1</sup>H-NMR of compound 480 in DMSO.**

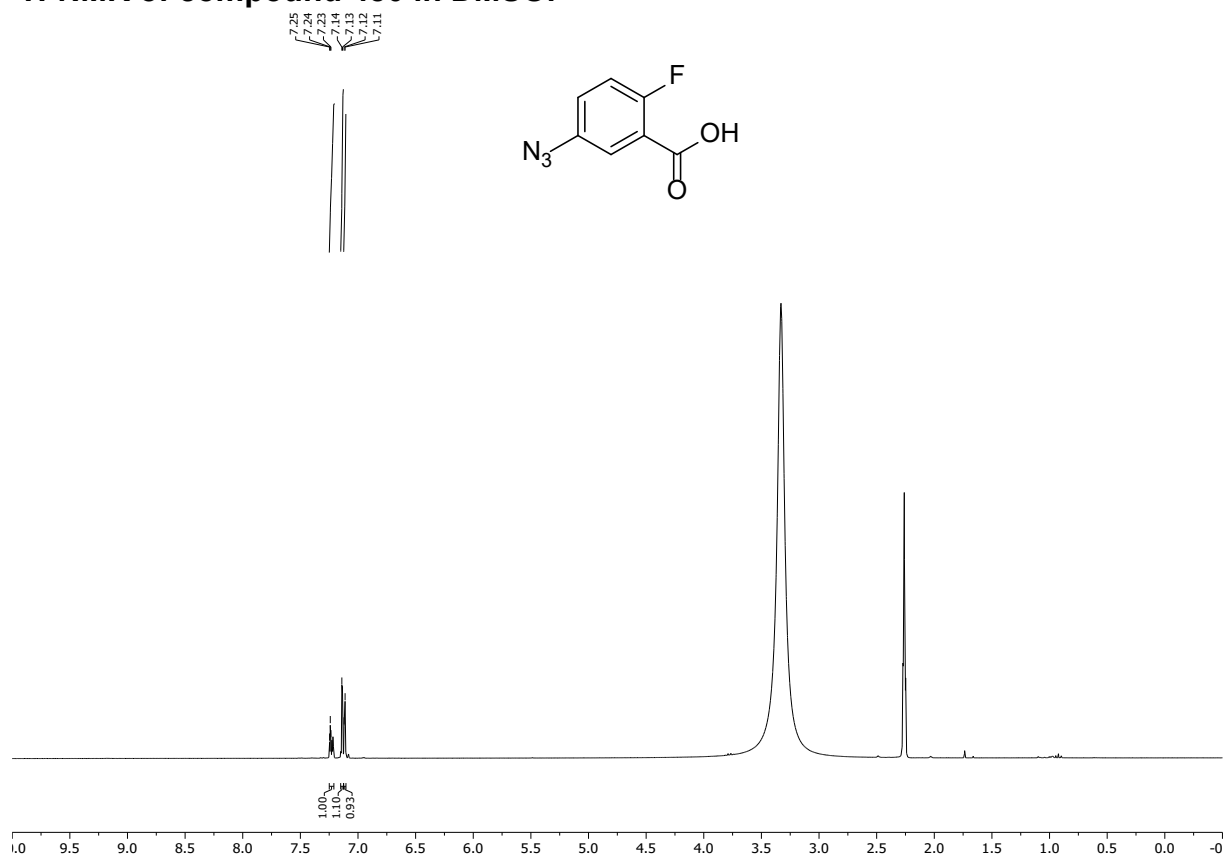

# <sup>1</sup>H-NMR and <sup>13</sup>C-NMR of compound 481 in DMSO.

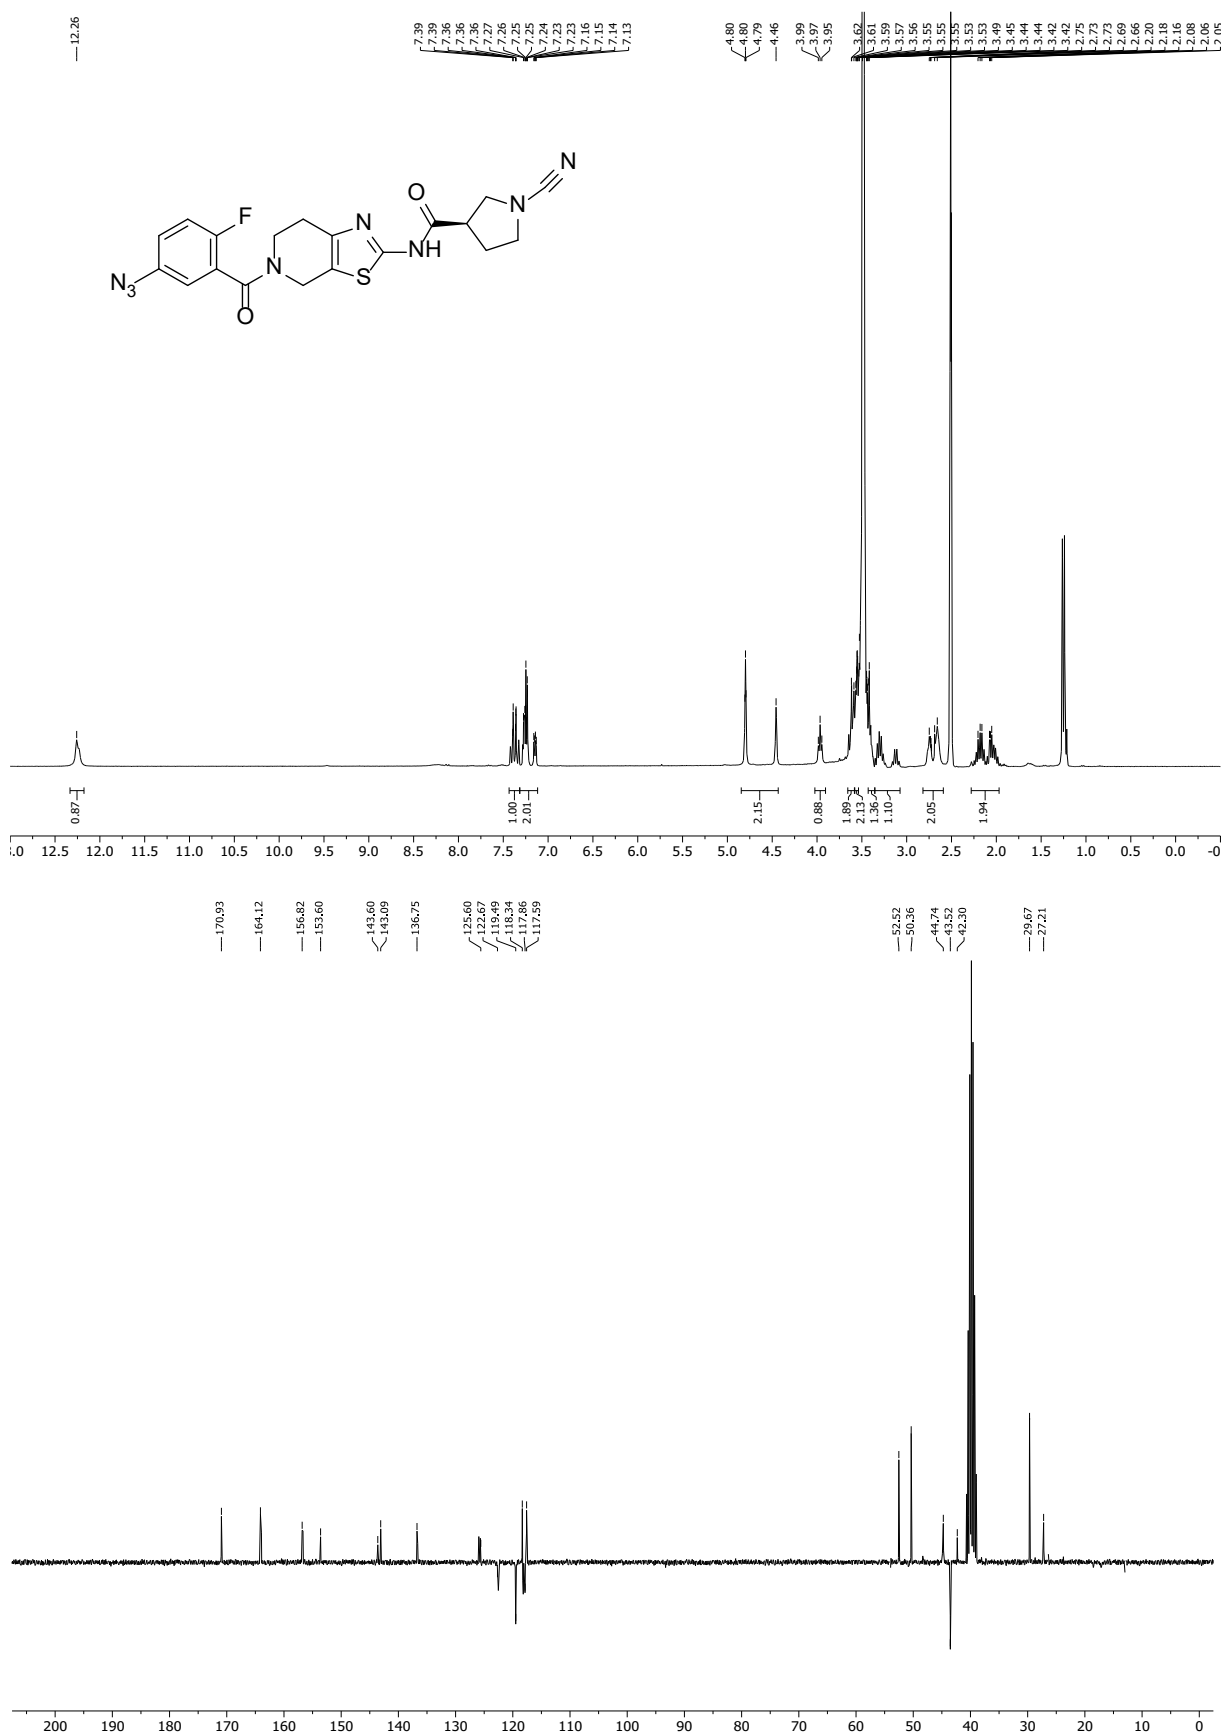

# <sup>1</sup>H-NMR and <sup>13</sup>C-NMR of compound JYQ-191 in DMSO.

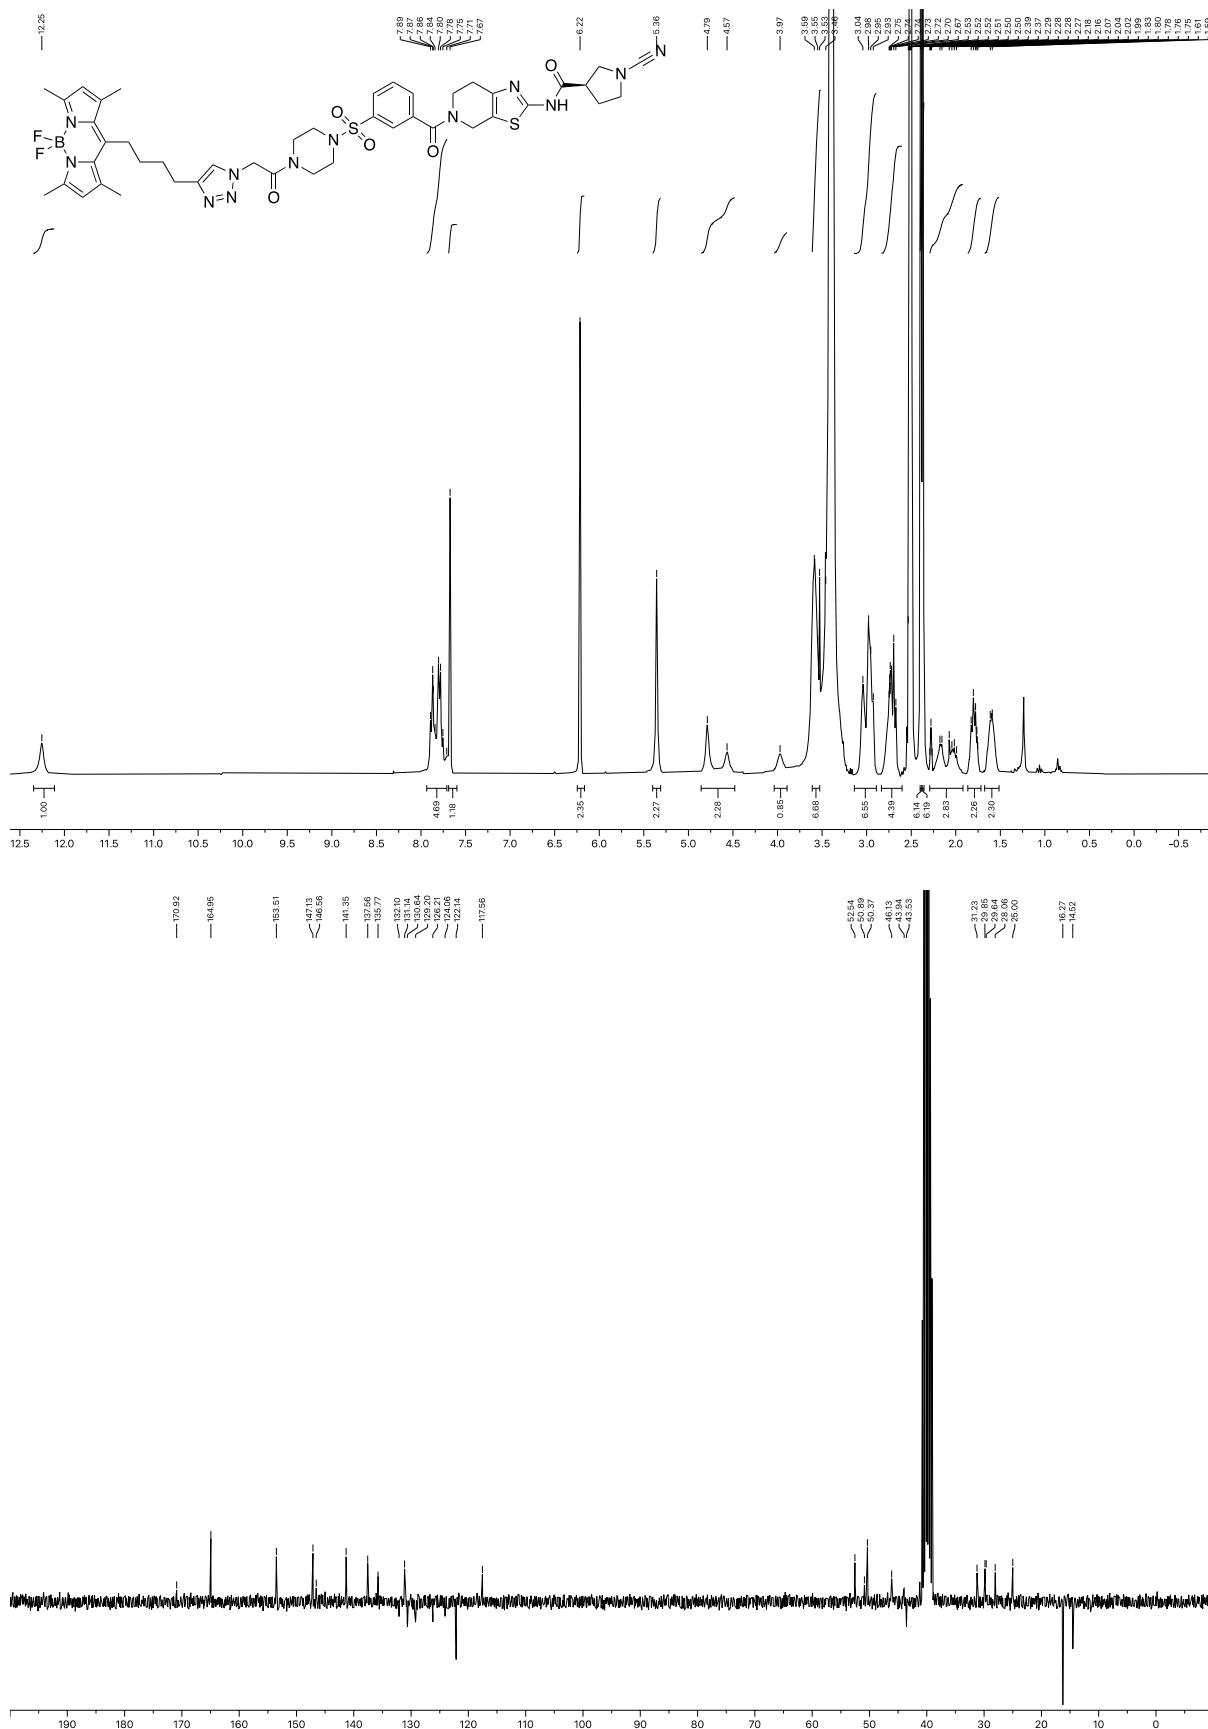

# <sup>1</sup>H-NMR and <sup>13</sup>C-NMR of compound JYQ-192 in DMSO.

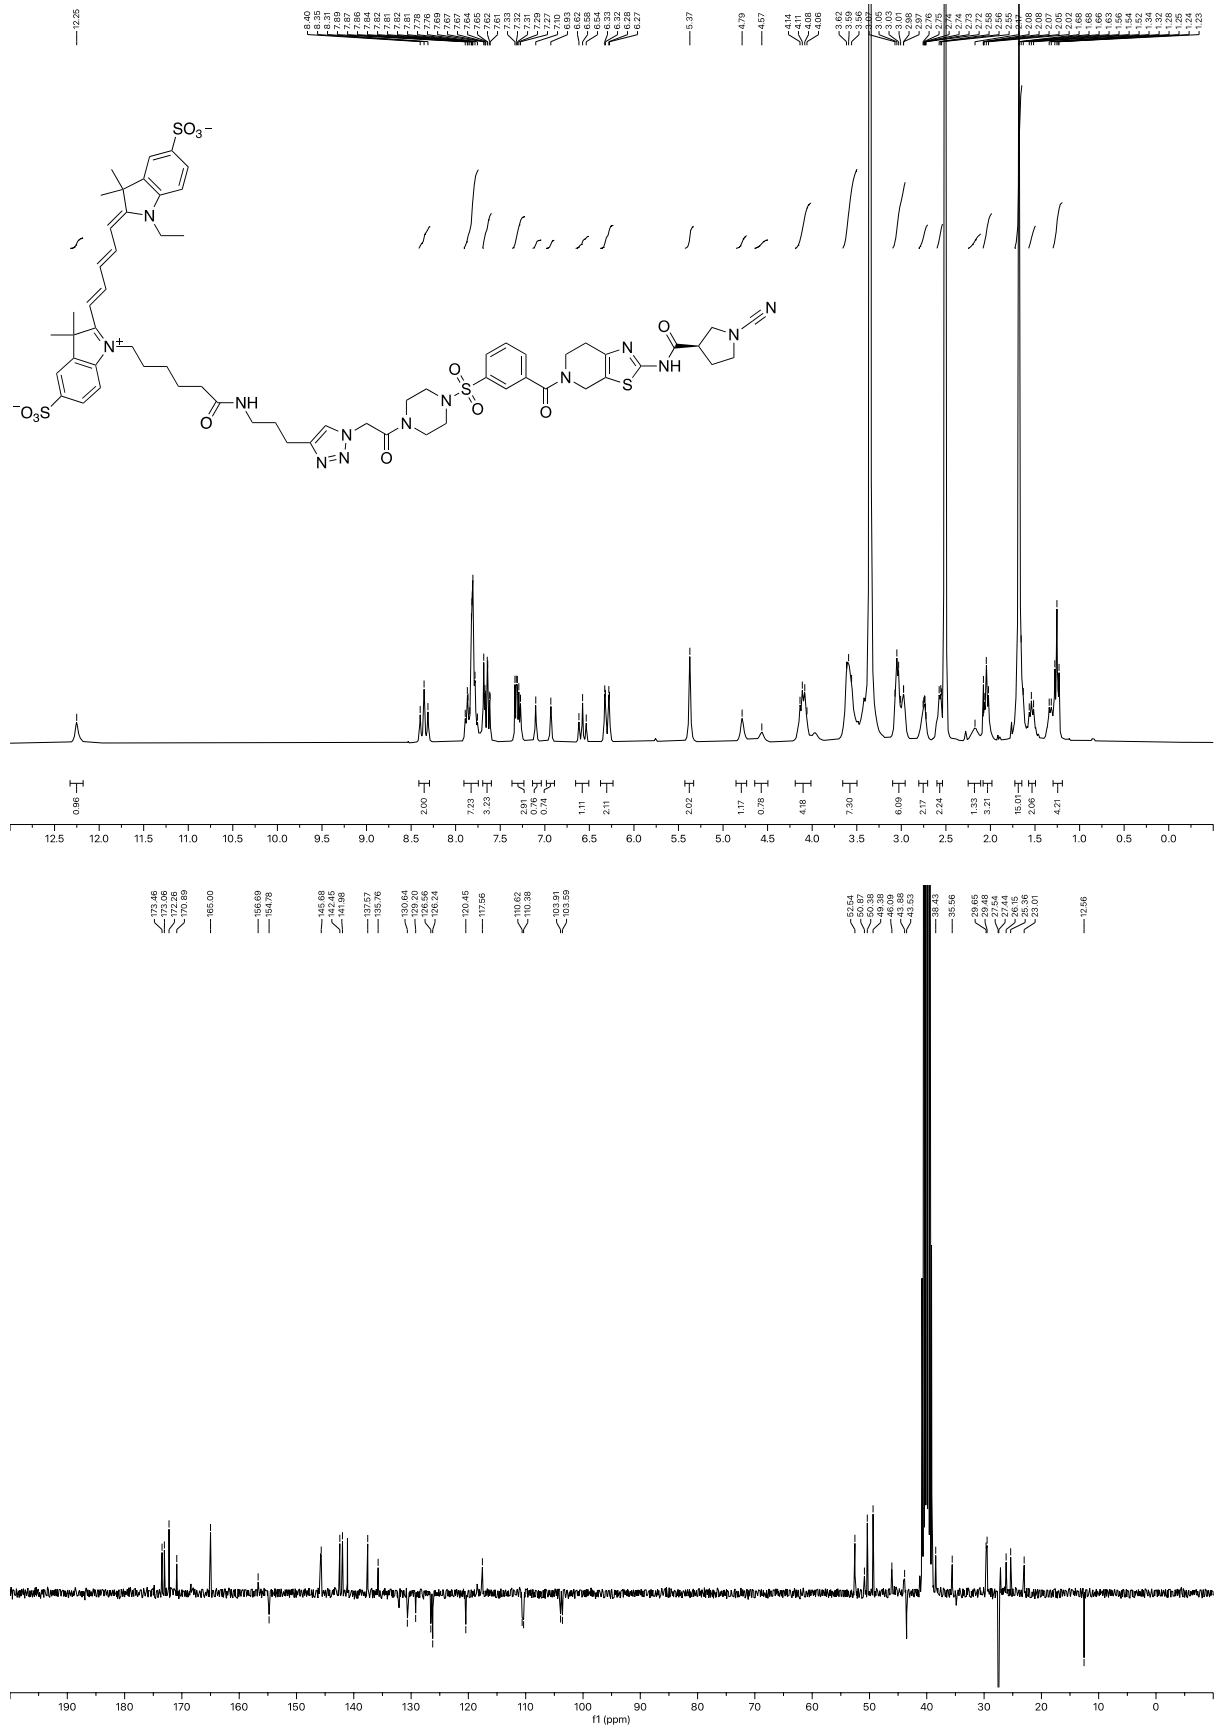

# <sup>1</sup>H-NMR and <sup>13</sup>C-NMR of compound JYQ-194 in DMSO.

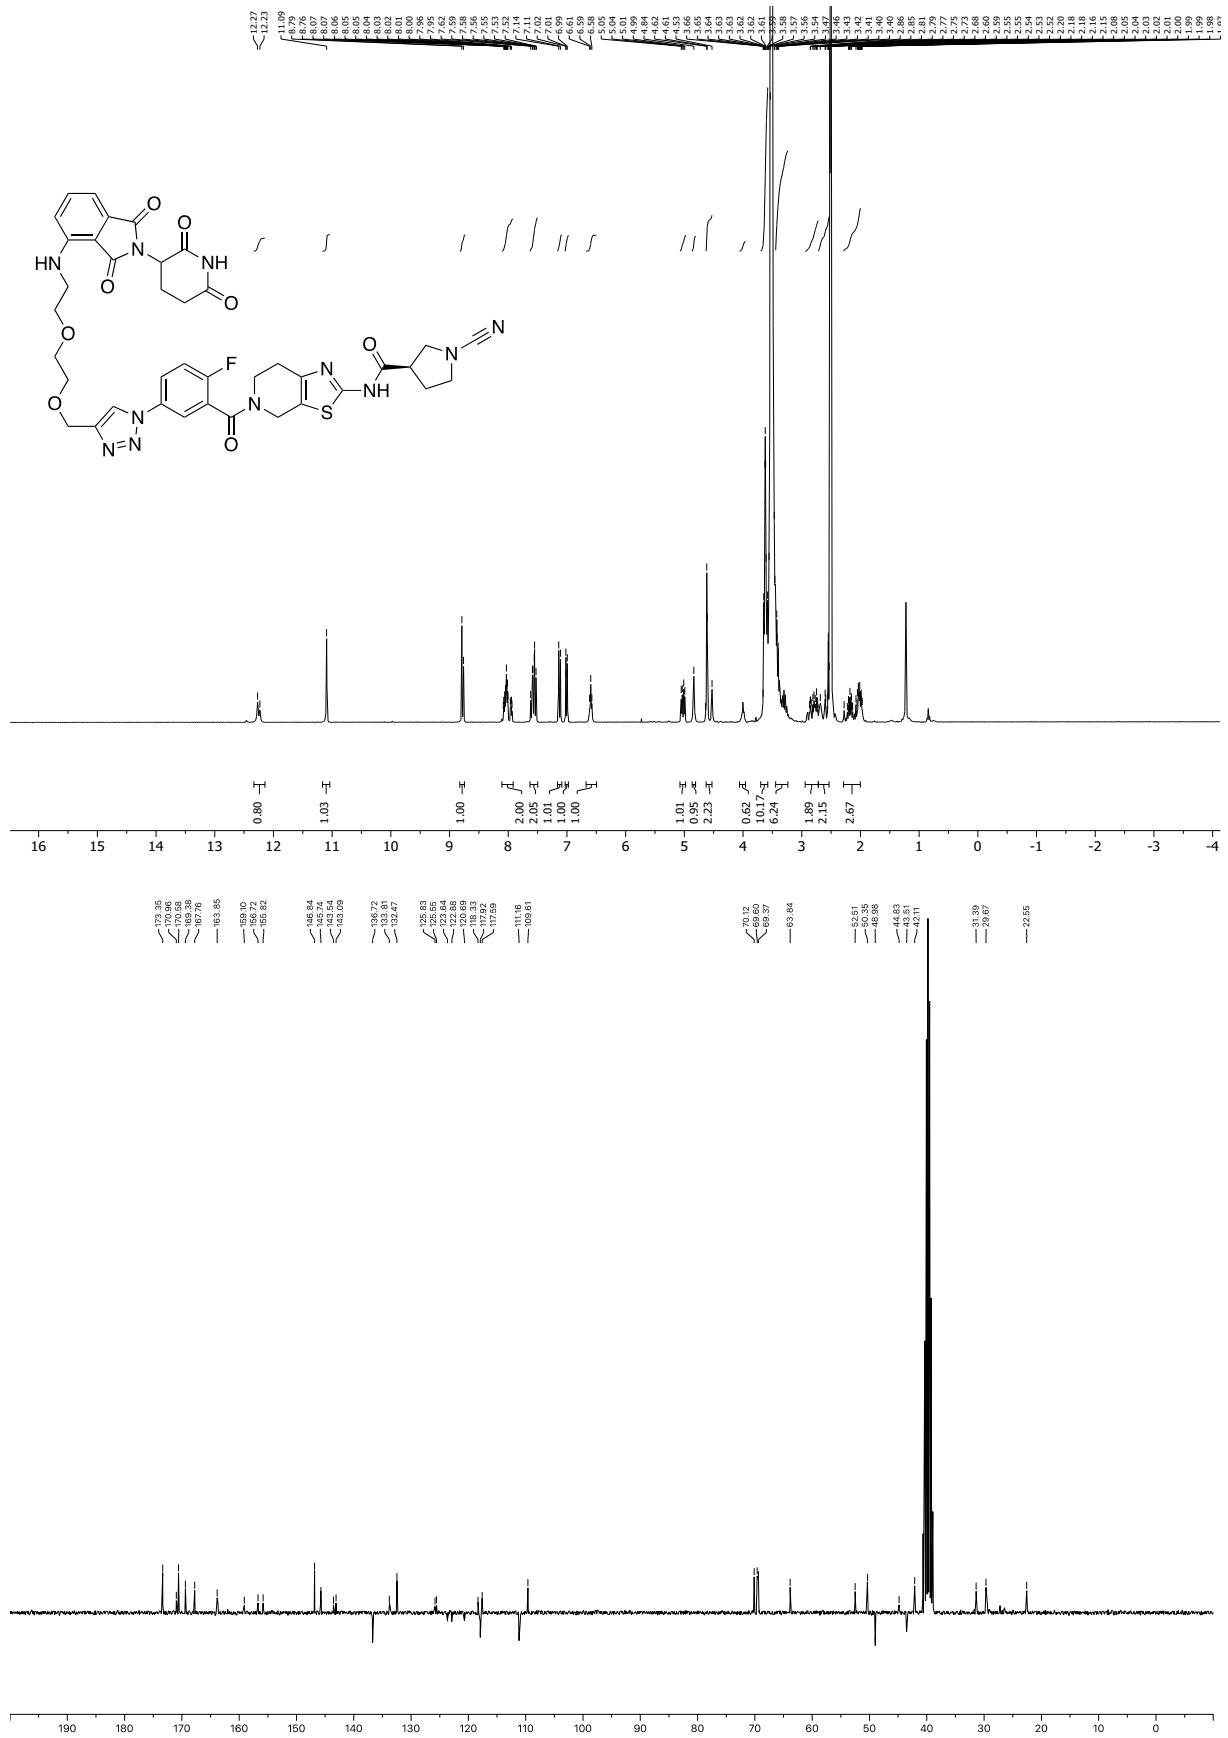



# <sup>1</sup>H-NMR and <sup>13</sup>C-NMR of compound JYQ-195 in DMSO.

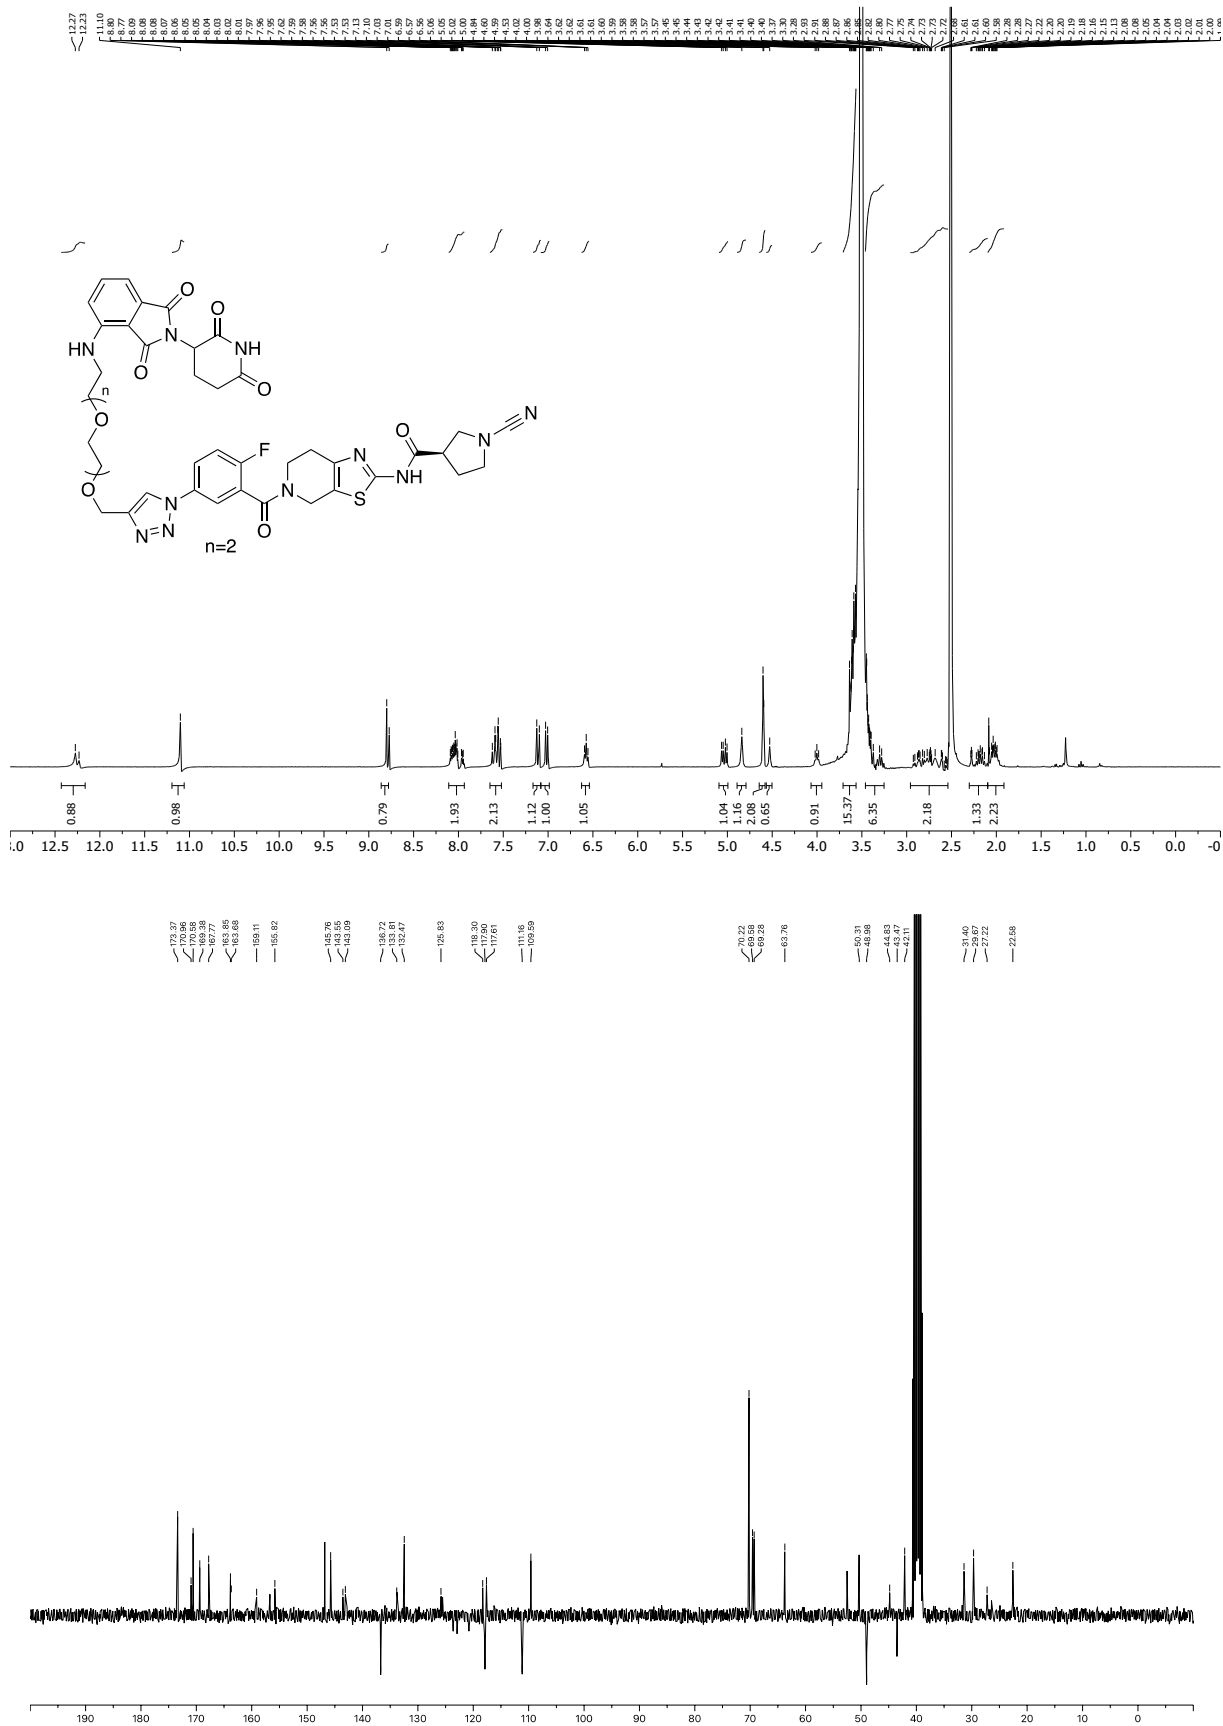





# JYQ-164

| Time | Height   | Area      | Area% |
|------|----------|-----------|-------|
| 3.42 | 14763    | 142.17    | 0.05  |
| 3.64 | 12895986 | 276325.06 | 99.95 |

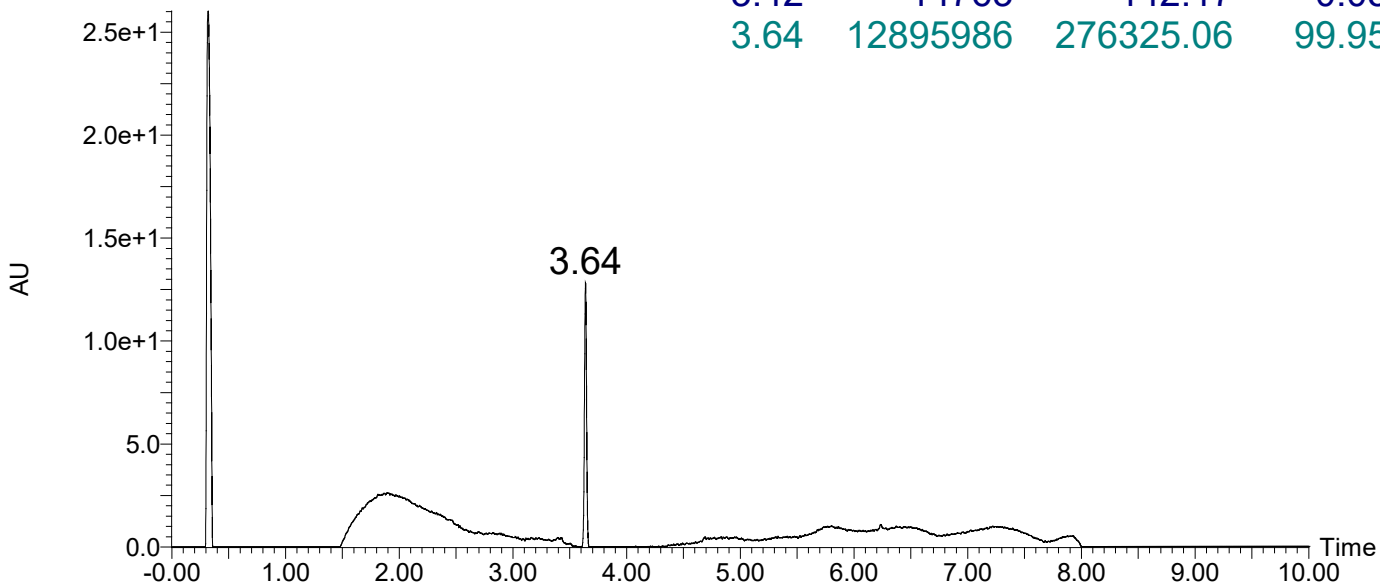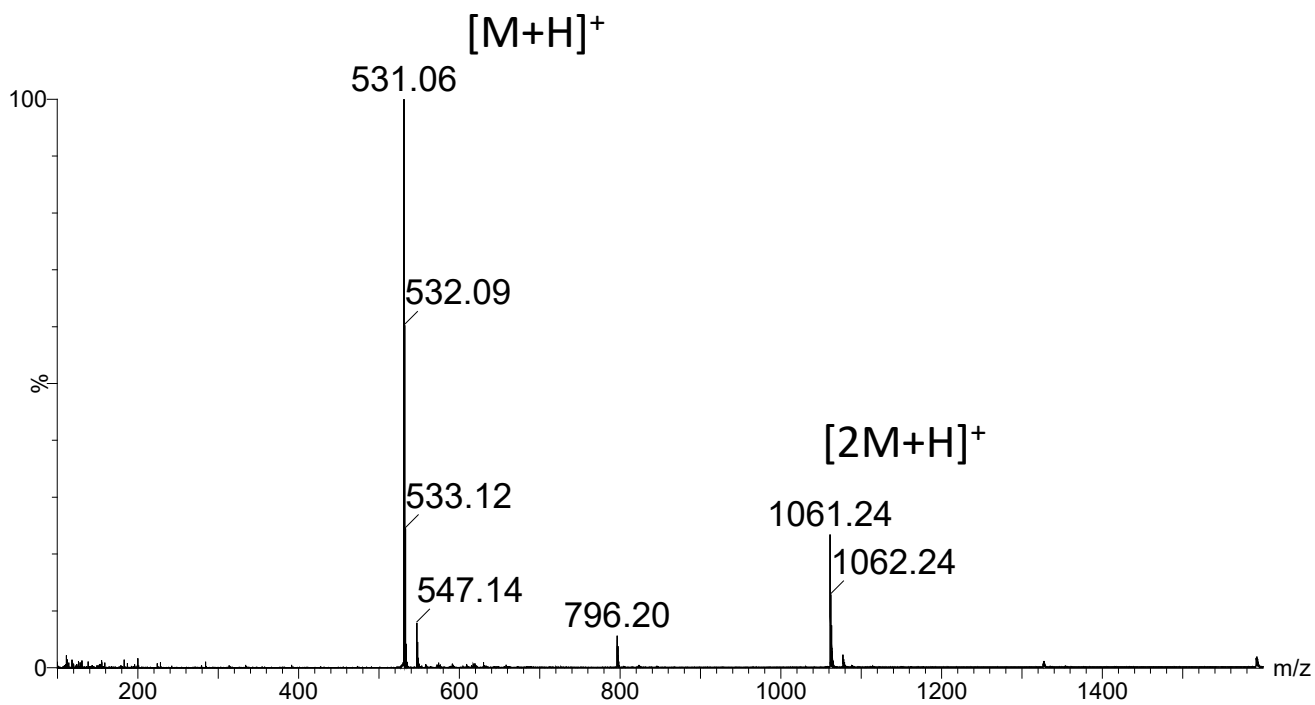

# JYQ-173

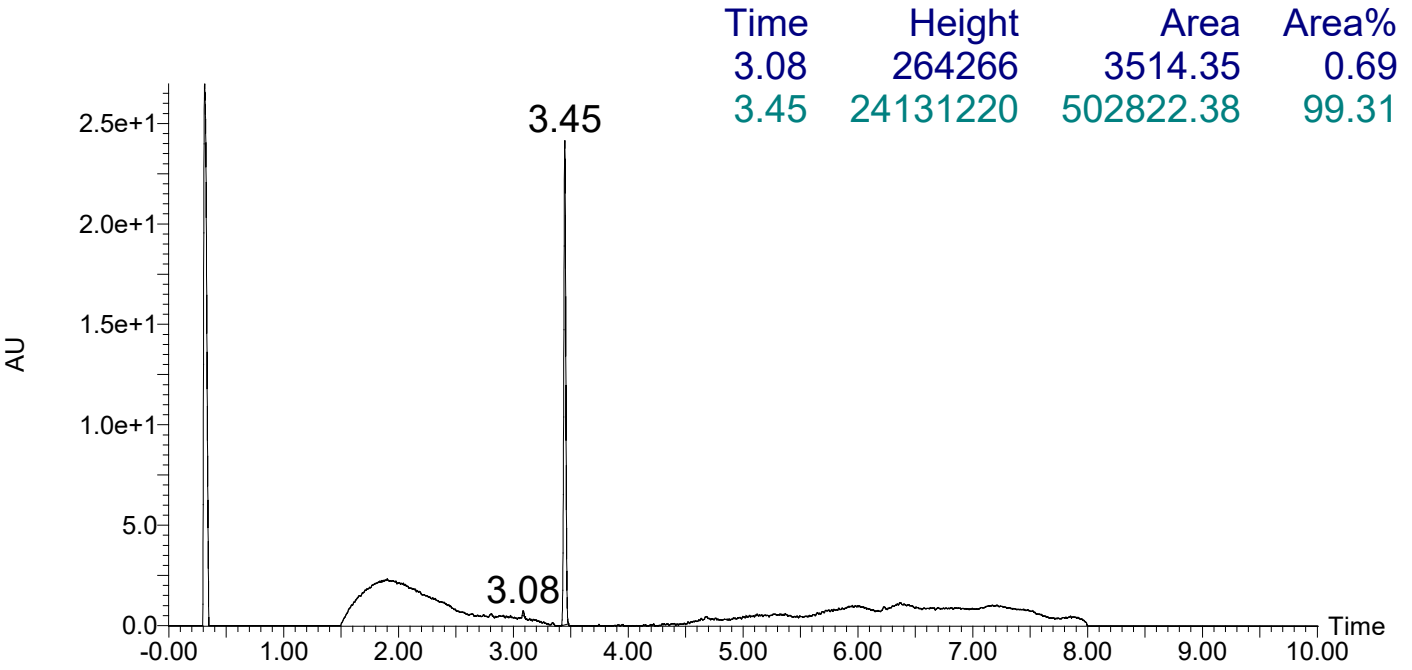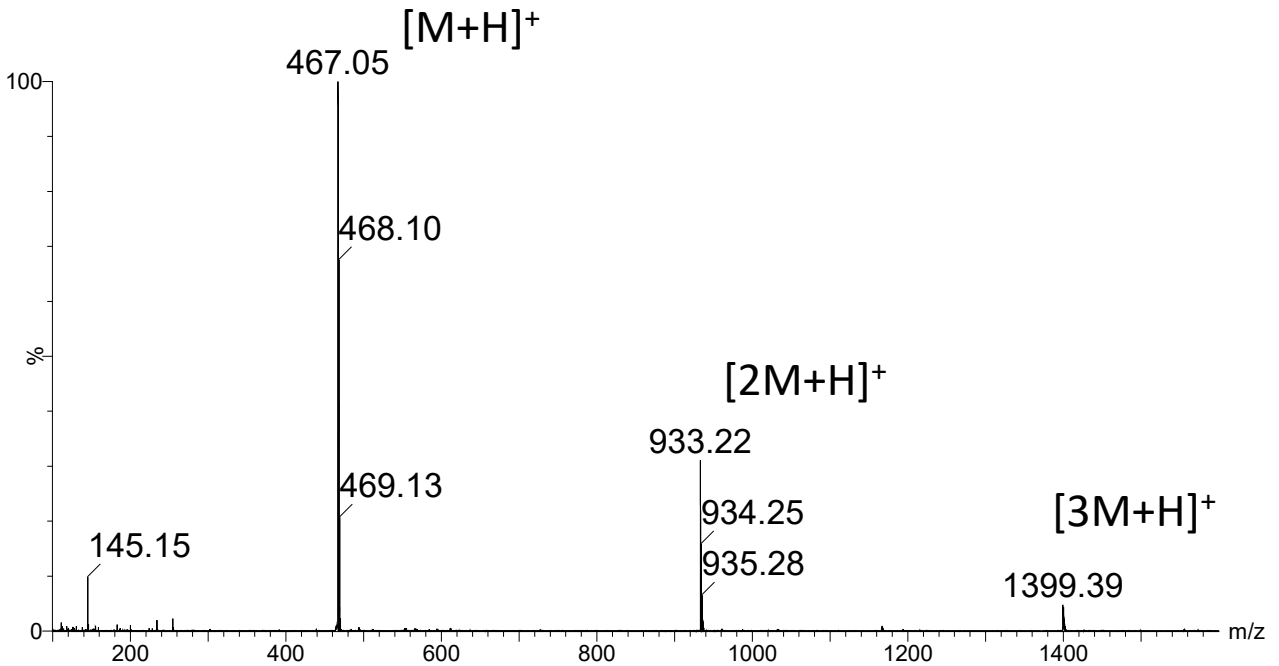

# JYQ-191

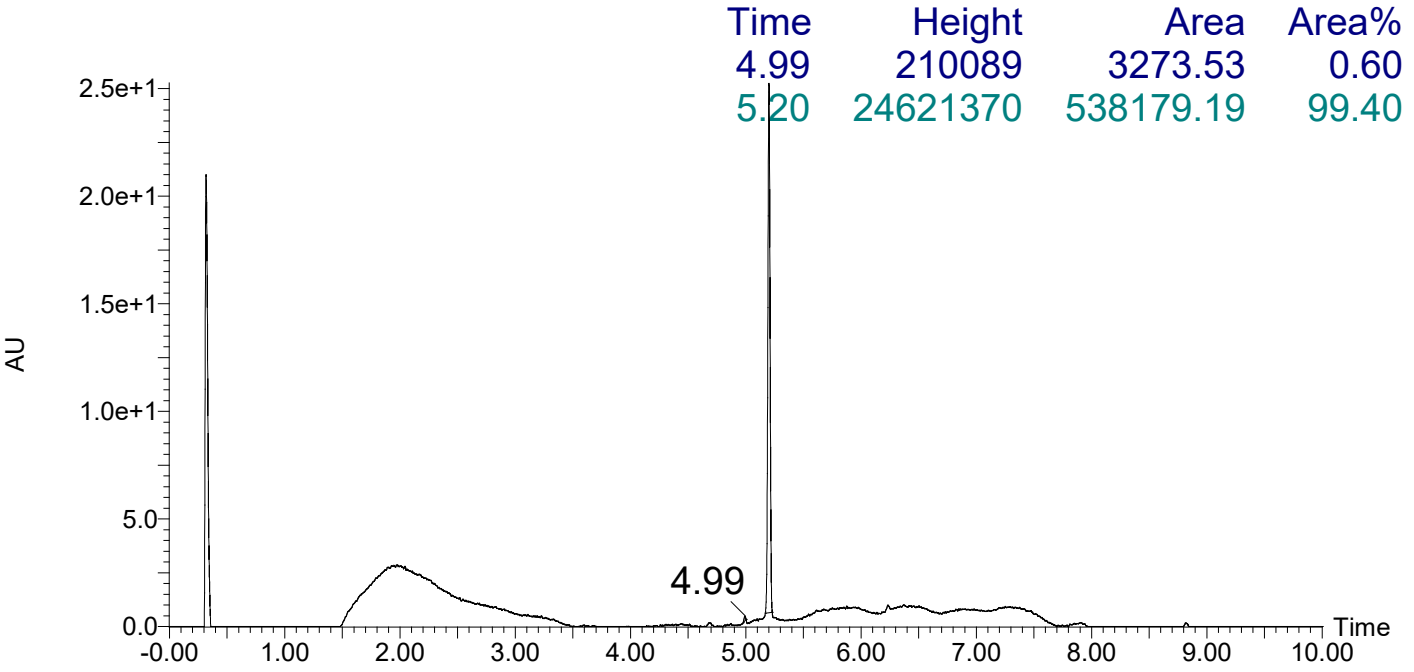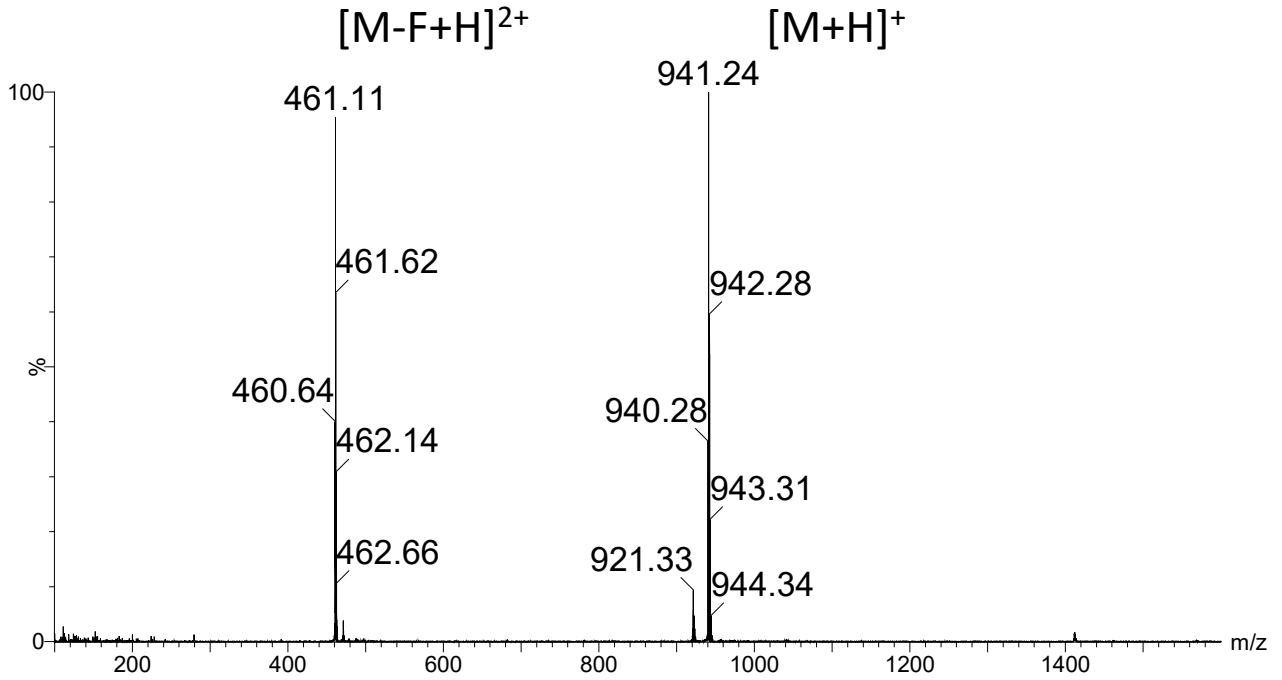

# JYQ-192

| Time | Height   | Area       | Area% |
|------|----------|------------|-------|
| 3.50 | 2158610  | 68878.09   | 1.99  |
| 3.70 | 94840592 | 3394834.25 | 98.01 |

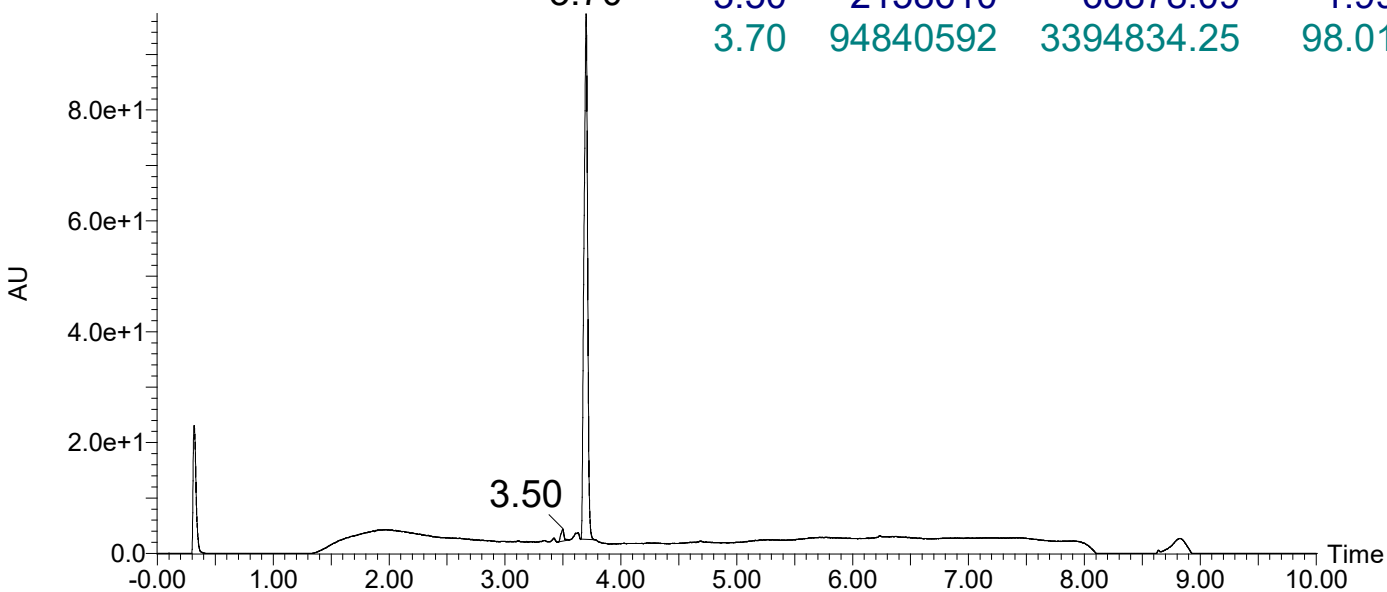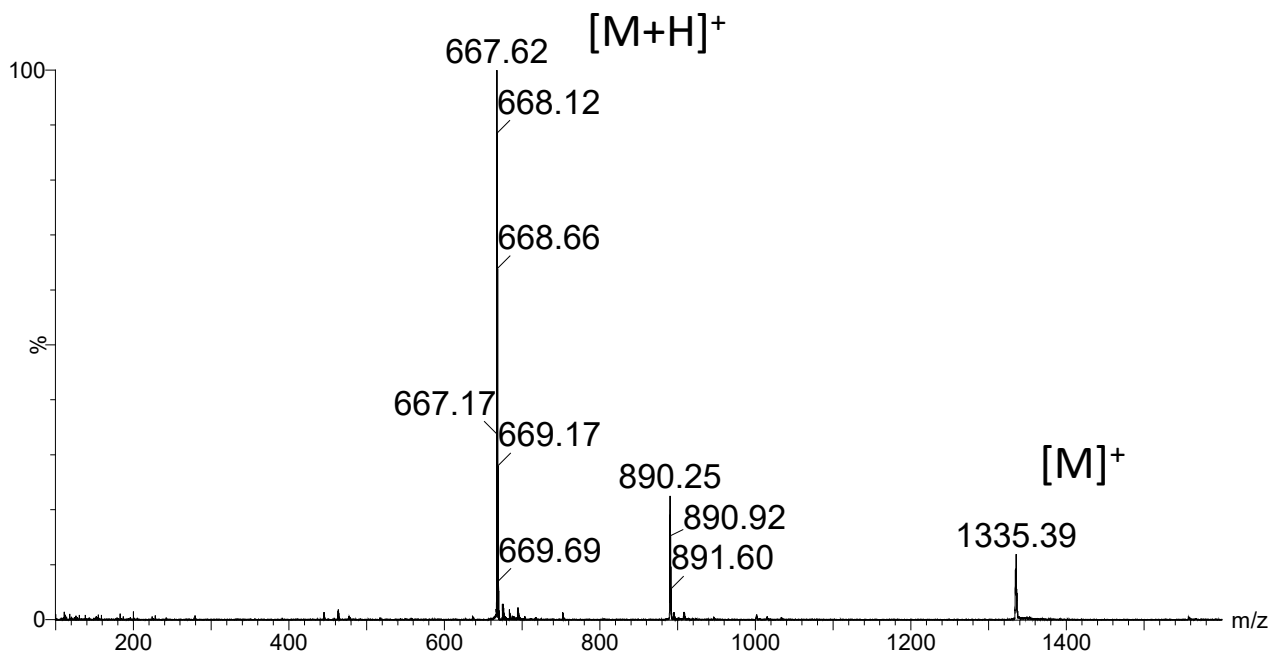

# JYQ-196

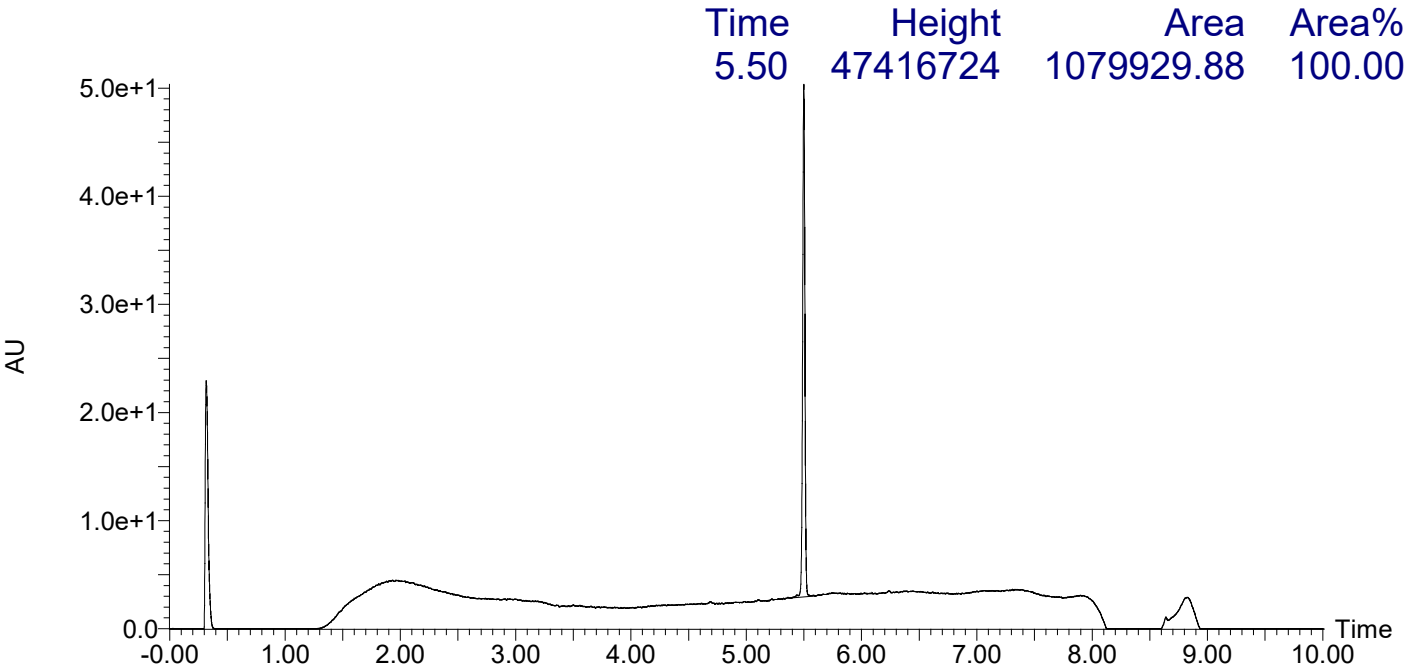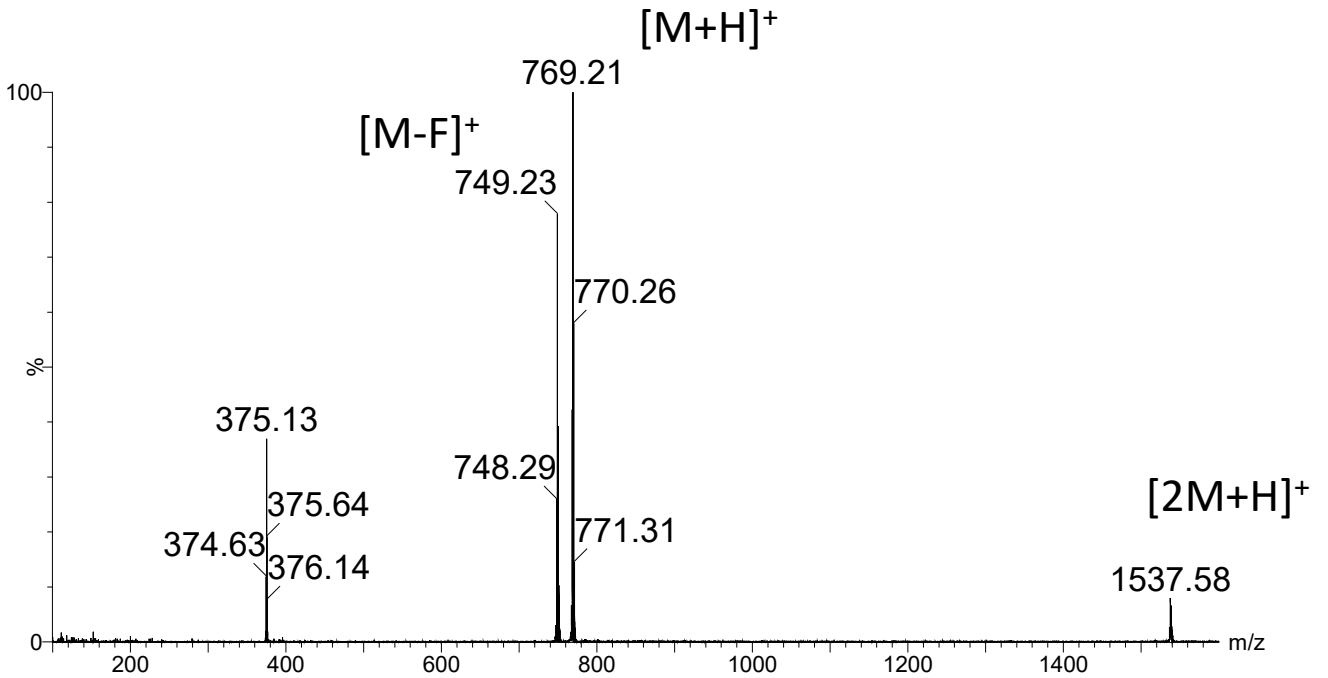



# JYQ-197

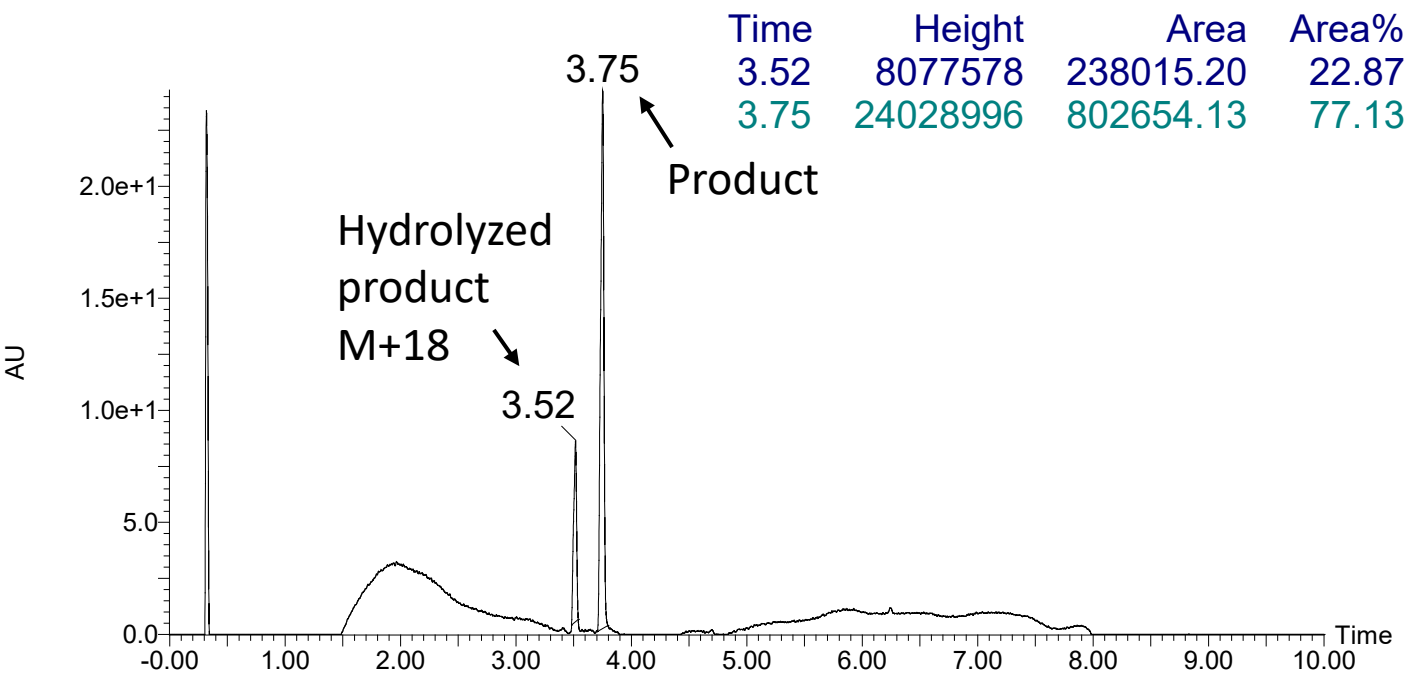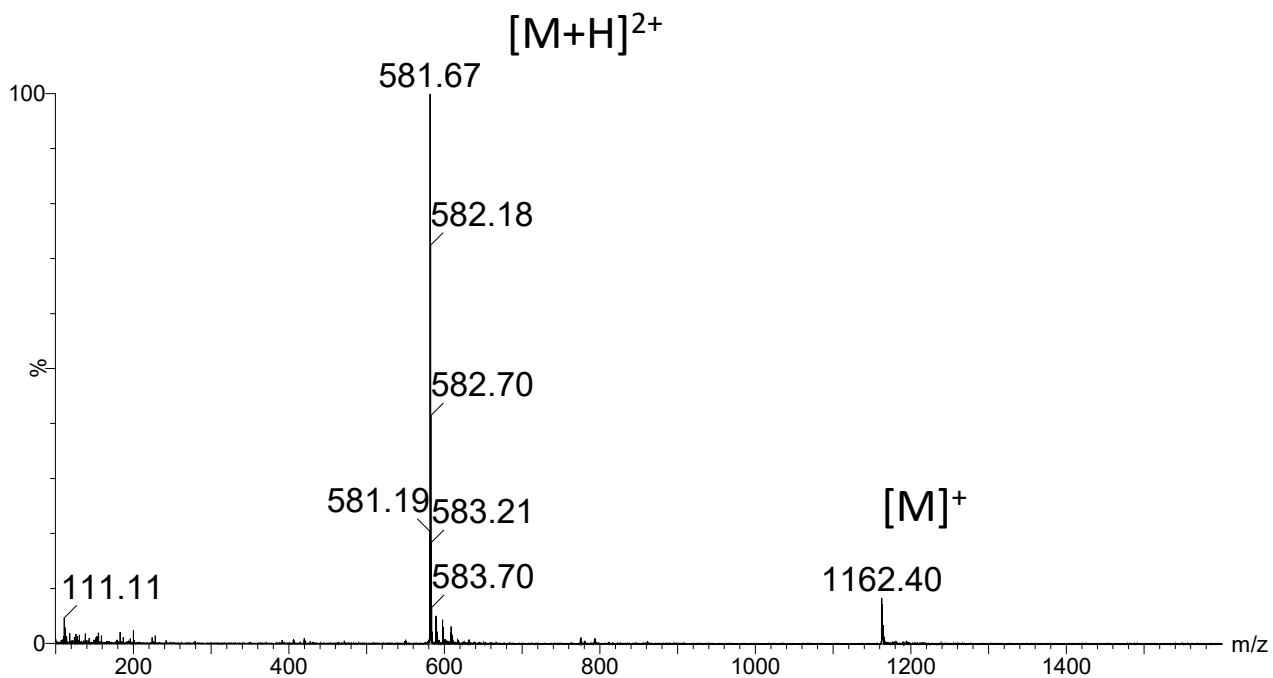

# JYQ-187

| Time | Height   | Area      | Area% |
|------|----------|-----------|-------|
| 3.71 | 185865   | 2974.73   | 1.31  |
| 4.08 | 10335345 | 223768.63 | 98.69 |

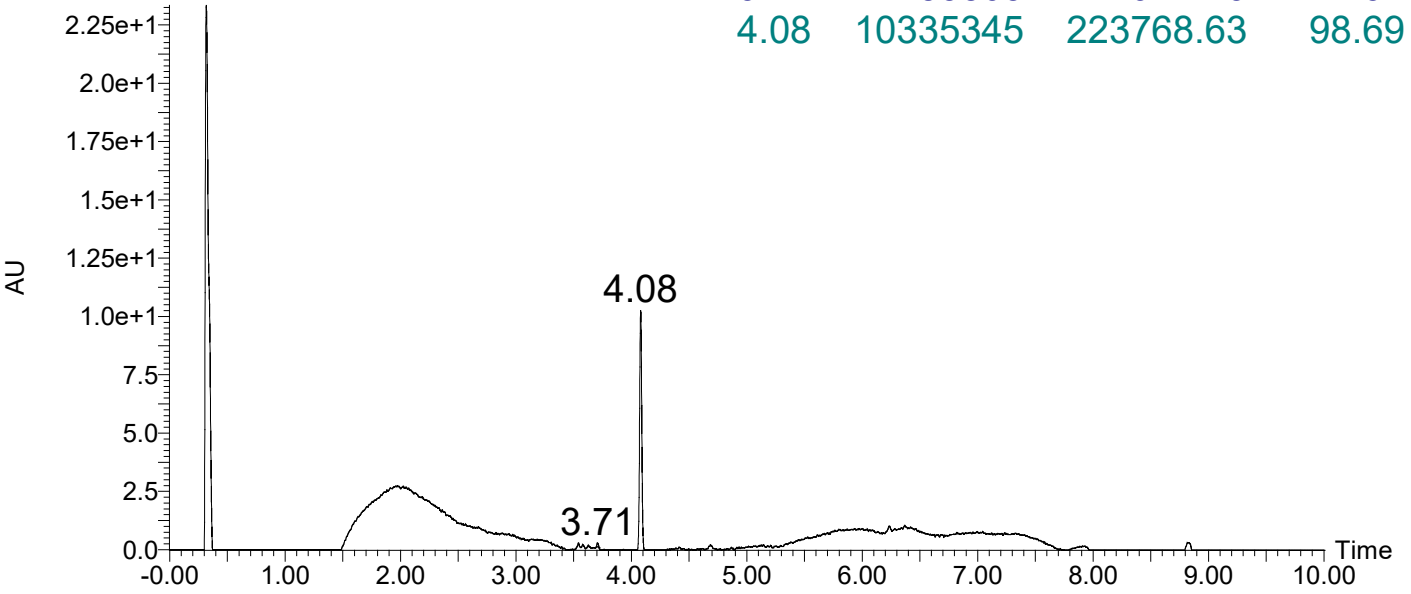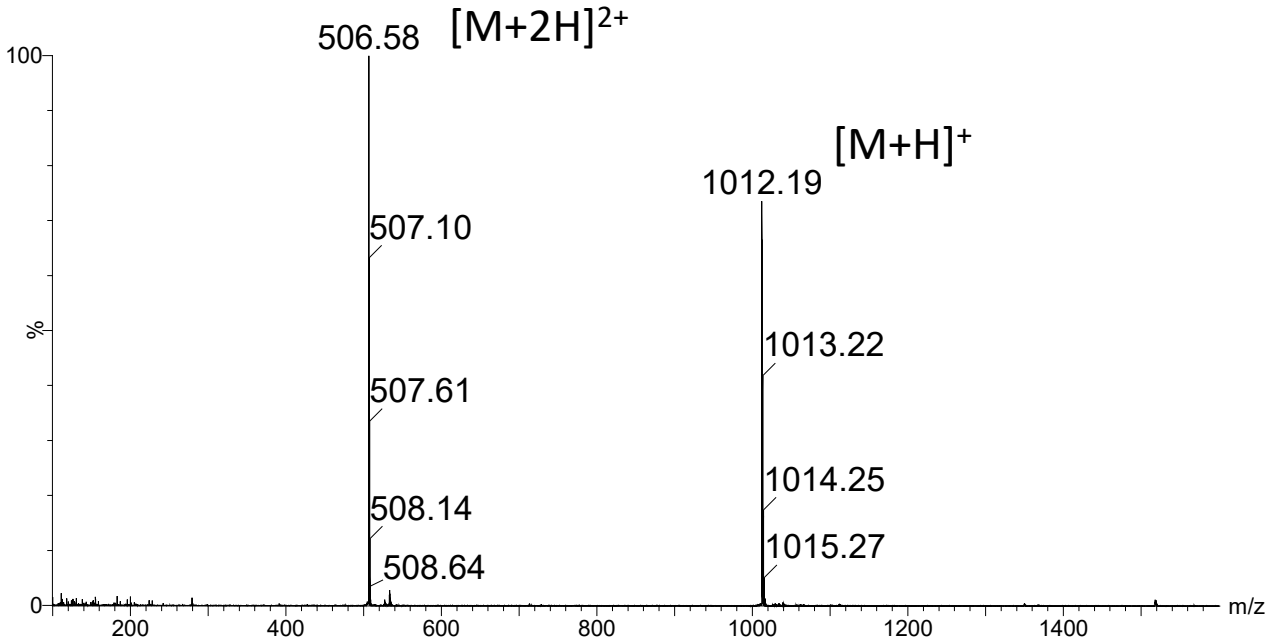

# JYQ-188

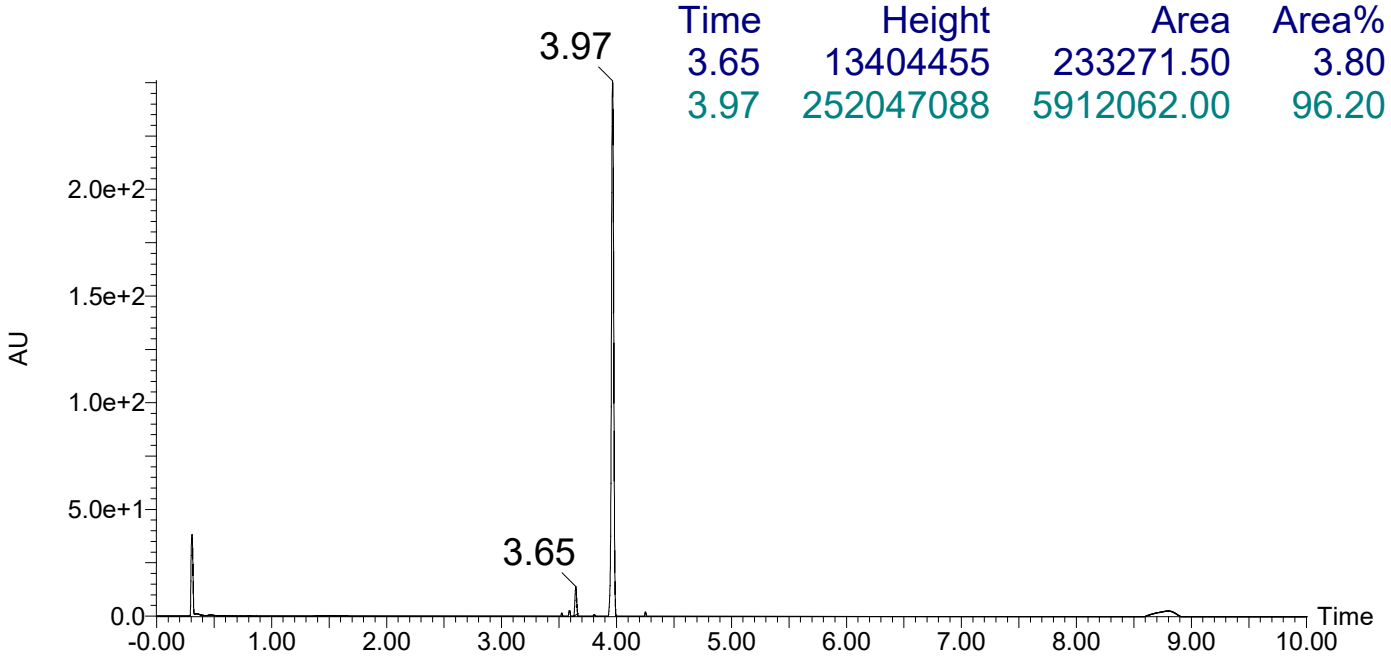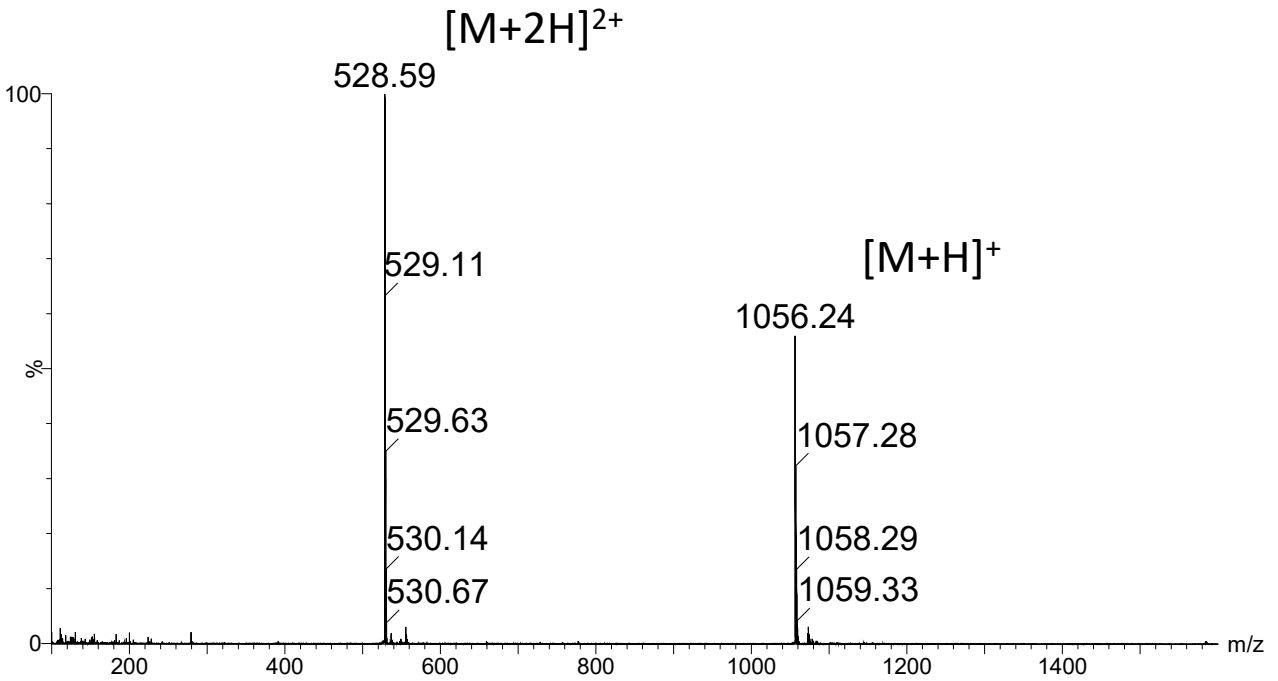

# JYQ-194

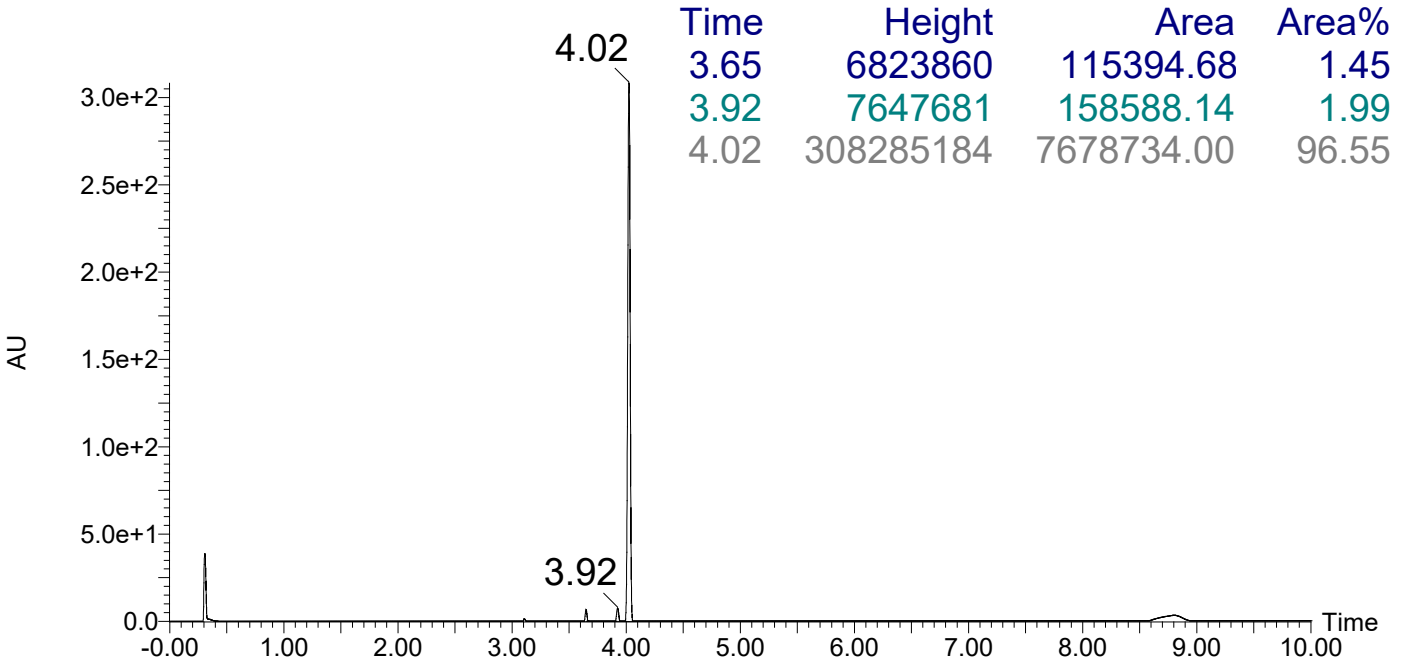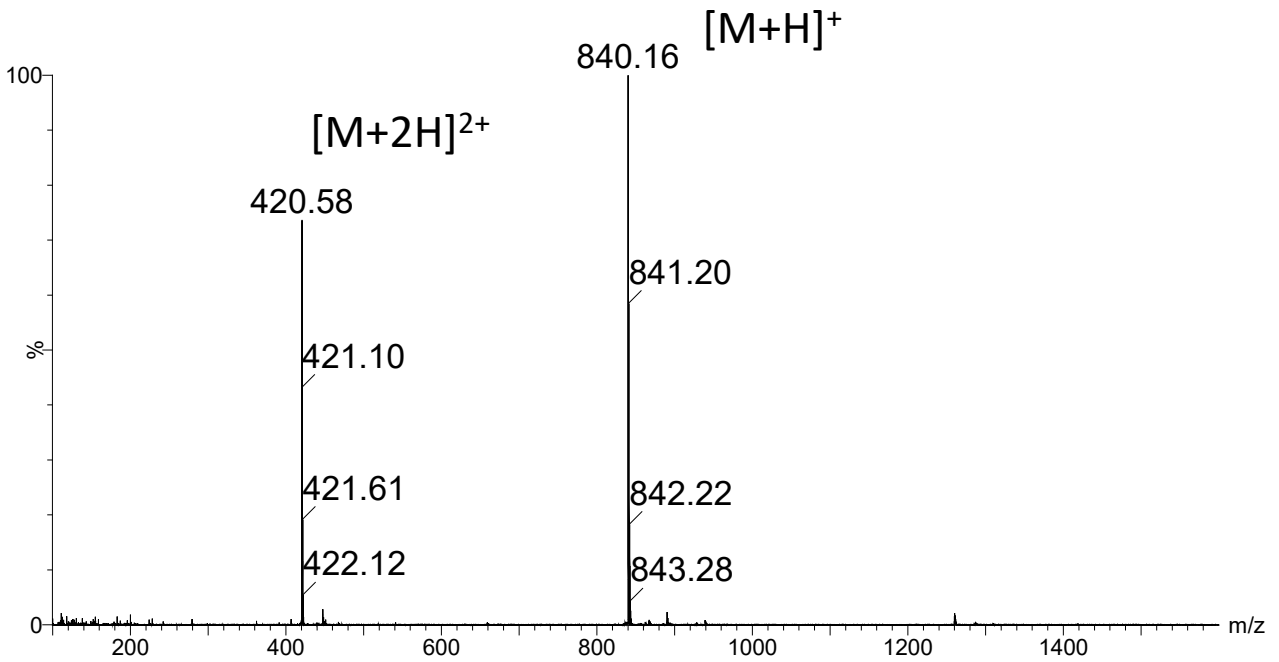

# JYQ-195

| Time | Height    | Area       | Area% |
|------|-----------|------------|-------|
| 3.66 | 17566310  | 191432.28  | 2.53  |
| 3.83 | 4728744   | 88709.19   | 1.17  |
| 4.03 | 298113696 | 7272005.50 | 96.29 |

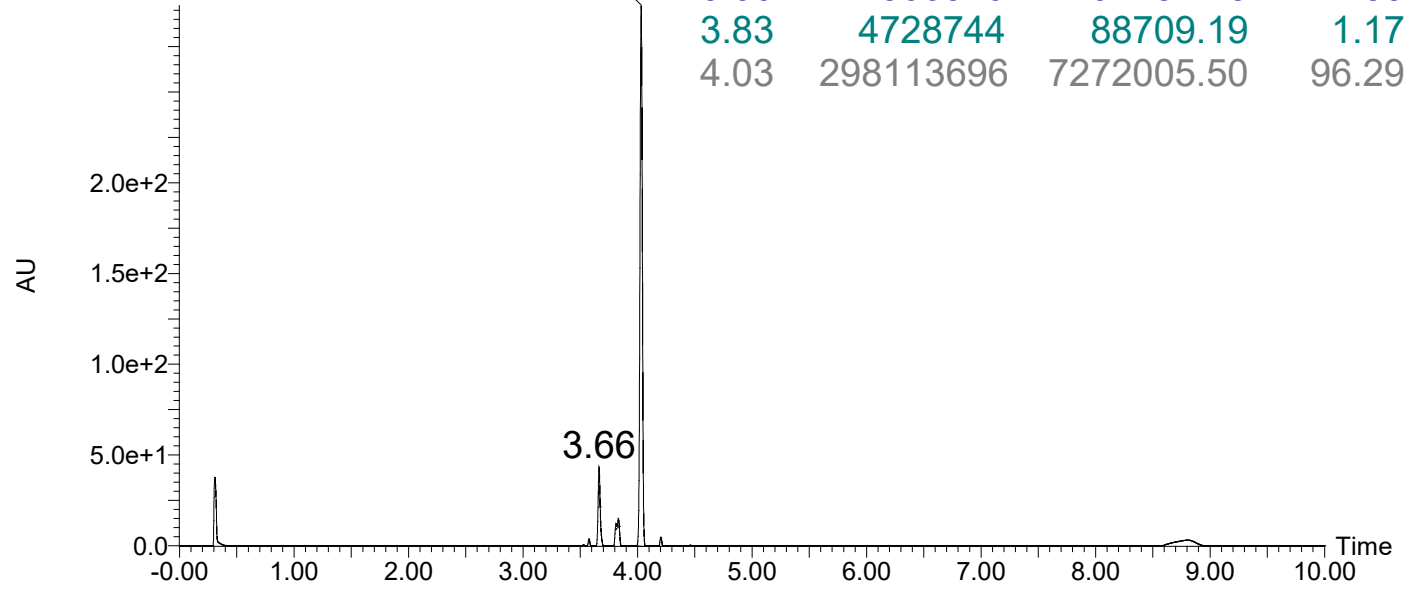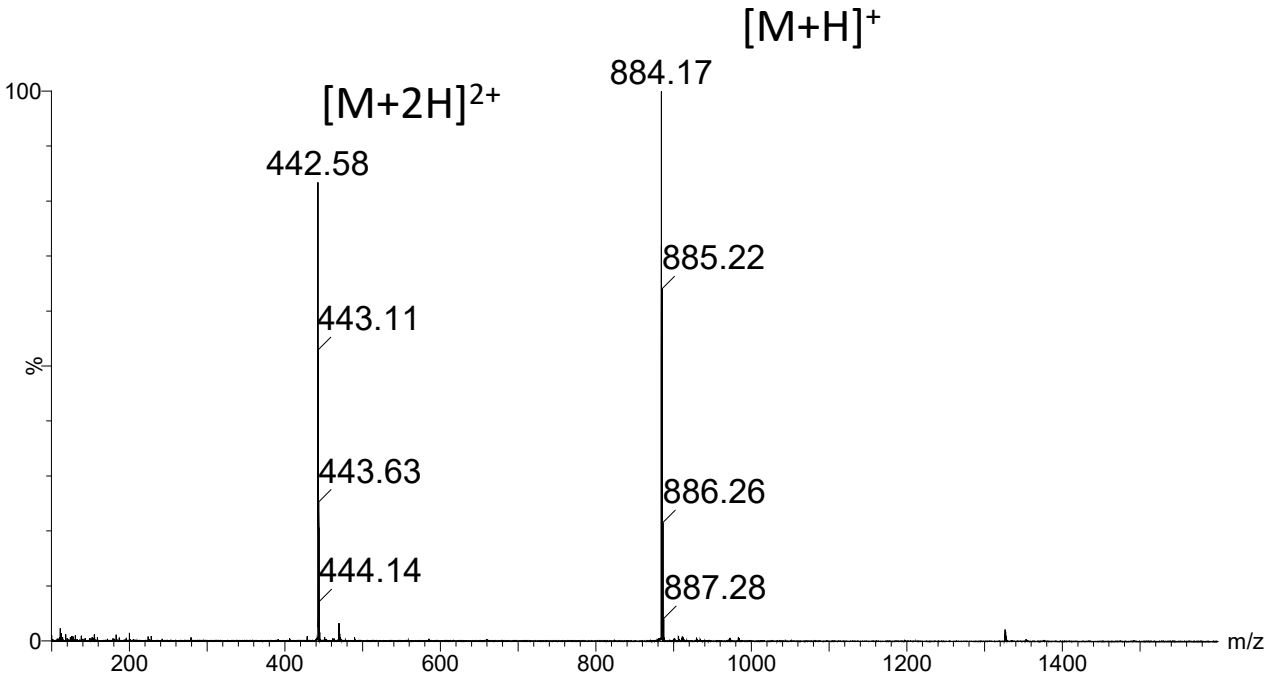

Supplement: jm3c02410_si_001.pdf [file jm3c02410_si_001.pdf]
